# Supplementary material for: A CRISPR screen in intestinal epithelial cells identifies novel factors for polarity and apical transport
Source: eLife journal article supplement (doi:10.7554/elife.80135), 2023-01-20

PIP5K1C:

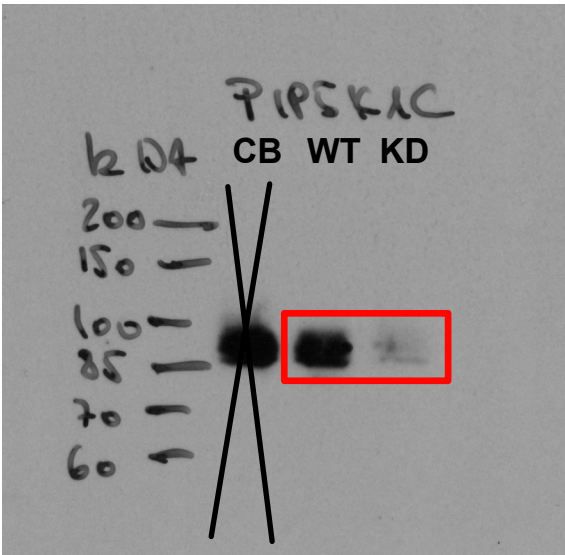

anti-PIP5K1C

Actin loading control  
(PIP5K1C):

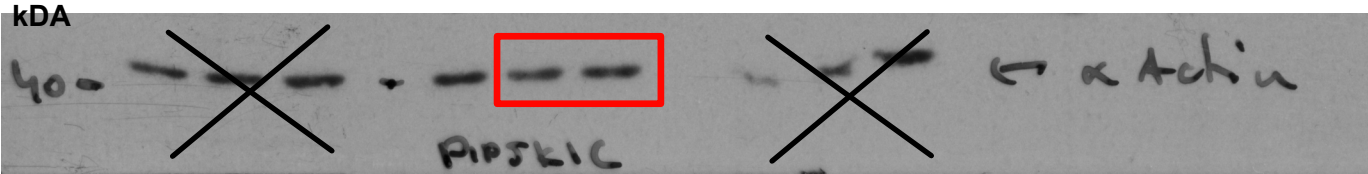

anti-Actin

**MTMR2:**

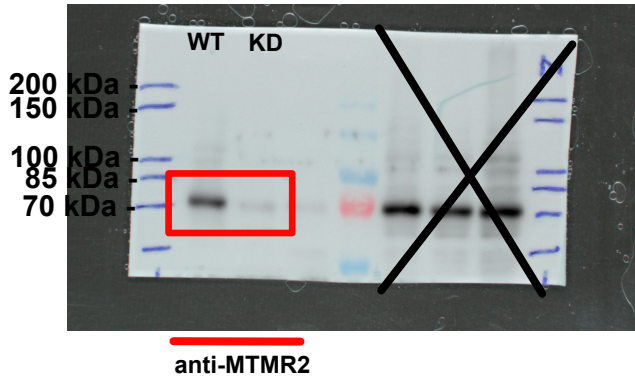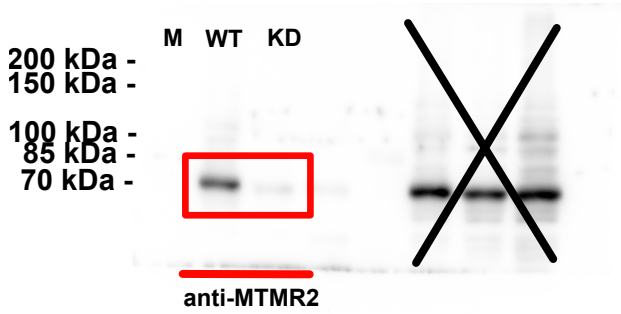

**Actin loading control  
(MTMR2):**

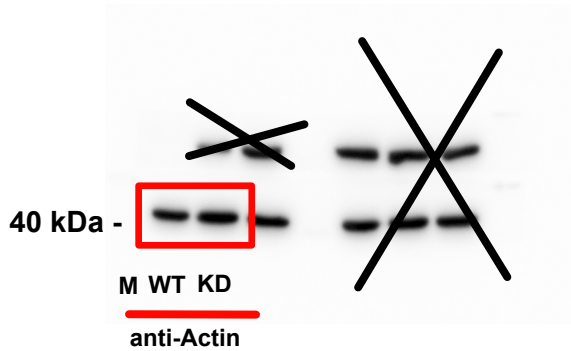

**ARHGAP33:**

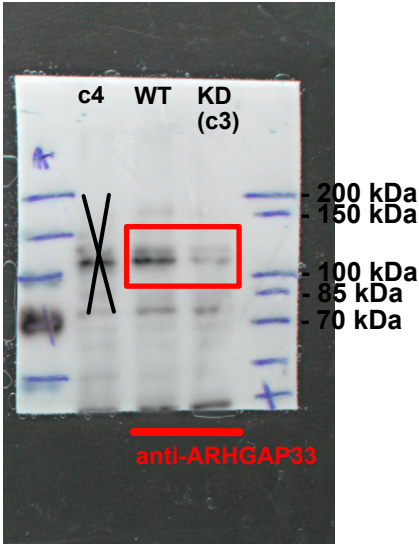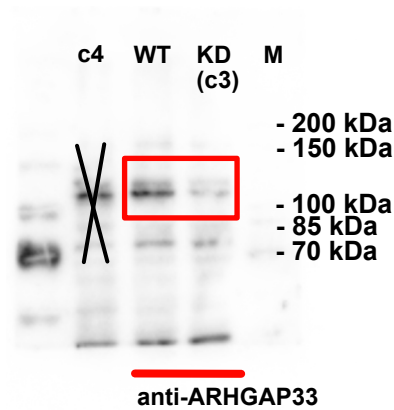

**Actin loading control  
(ARHGAP33):**

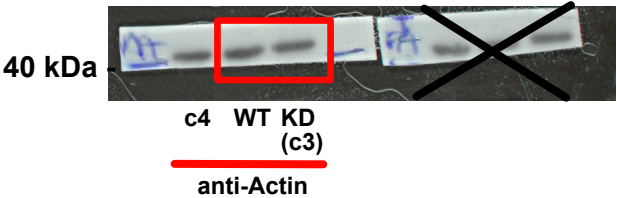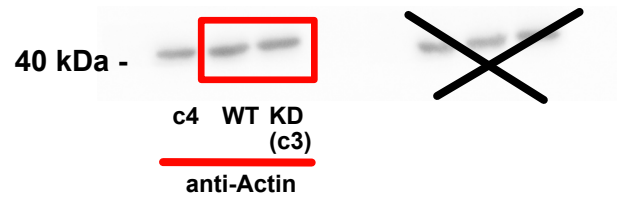

**TM9SF4:**

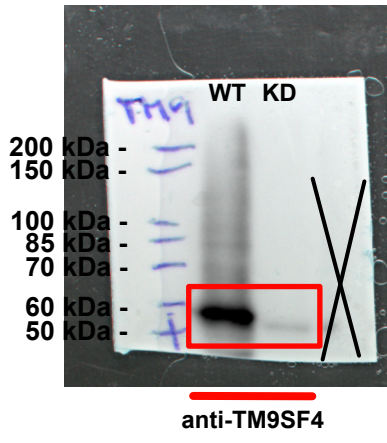

**GALNT2:**

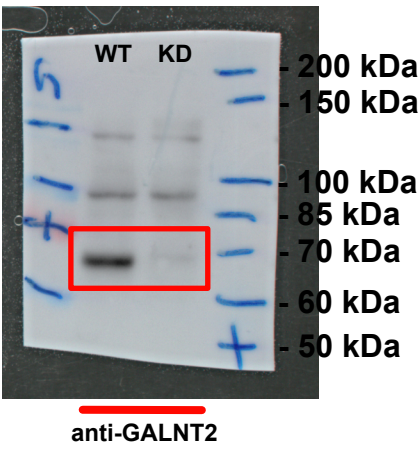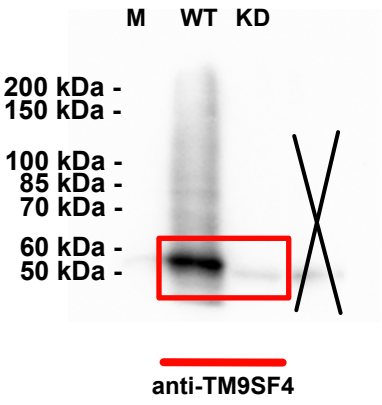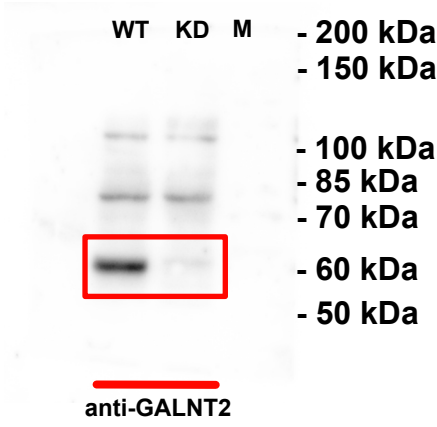

**Actin loading control (TM9SF4):**

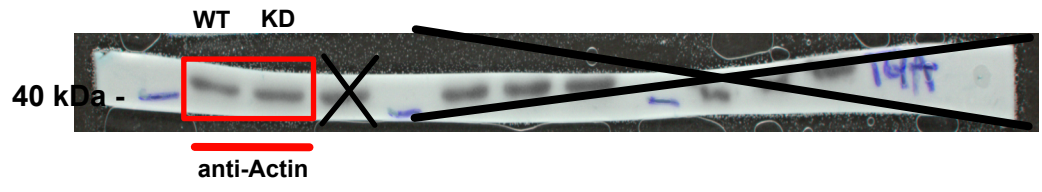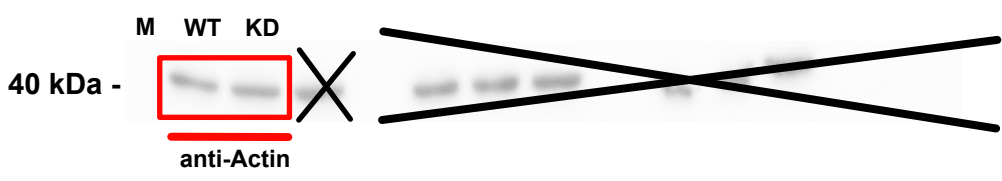

**Actin loading control (GALNT2):**

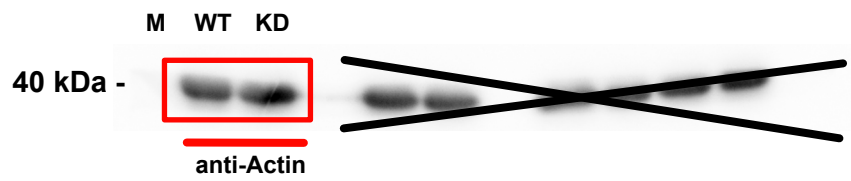

**ANO8:**

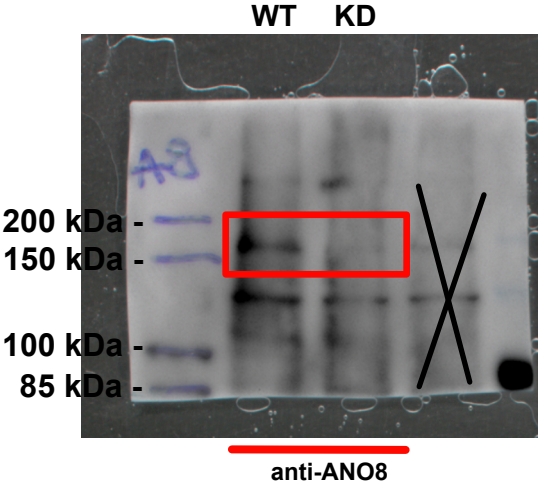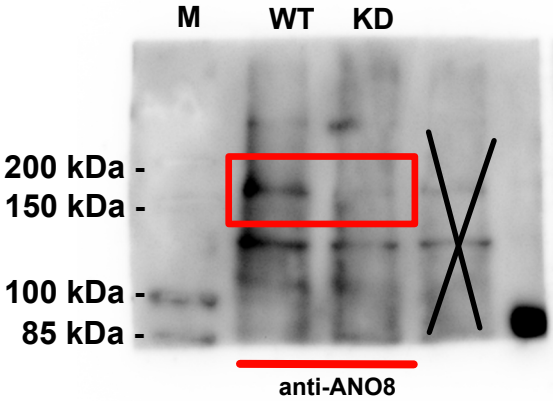

**Actin loading control  
(ANO8):**

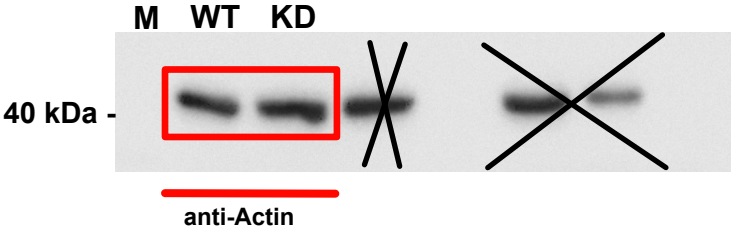

**TMEM110:**

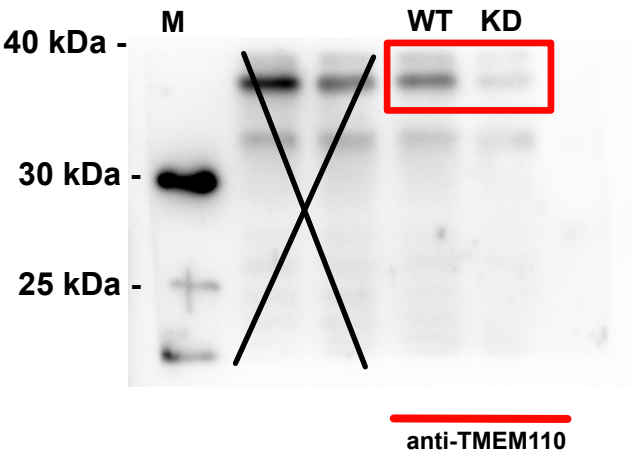

**Actin loading control  
(TMEM110):**

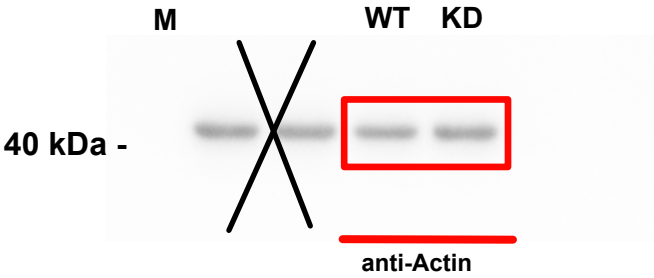

Supplement: supp [file elife-80135-supp-v1.zip]
