# Supplementary material for: A CRISPR screen in intestinal epithelial cells identifies novel factors for polarity and apical transport
Source: eLife. 2023 Jan 20;12:e80135. doi: 10.7554/eLife.80135 (PMC9889089; doi:10.7554/eLife.80135)
Supplement: Supplementary file 1. [file elife-80135-supp1.xlsx]

## Sheet: Table_1_A_toptag
ID	Sequences	Gene	logFC	logCPM	LR	PValue	FDR
HGLibA_37075	ACCTGCAAACATCCAGTCAC	PLEKHA5	10.6786	1.73838	8.06064	0.00452372	0.481907
HGLibA_40206	GAAGACCGTACACGCTTTGT	RANBP3L	10.5788	1.4245	7.78867	0.00525748	0.481907
HGLibA_02385	GATCTTGTCAGAGCGAGTAG	APBB3	10.3841	1.28718	7.58737	0.00587788	0.481907
HGLibB_38369	CGAGTGGGGCCGAGCCCACA	PRDX5	10.3145	1.32347	7.54122	0.00603031	0.481907
HGLibA_06684	CGTCCTGGAGATCTCAATGC	C9orf139	9.94475	0.826187	7.14444	0.00751969	0.481907
HGLibA_48386	GGGTACAAAGTTTGCTAGCA	TAS2R30	9.78697	0.688737	7.00662	0.00812091	0.481907
HGLibA_16982	TGCCTCCGCGTCGGAAGCGA	FBXL15	9.66461	0.452945	6.88947	0.00867051	0.481907
HGLibA_62894	GAGAGCAGCAGGGGAGAGAG	hsa-mir-6510	9.55078	0.518153	6.80359	0.00909746	0.481907
HGLibB_30382	AGTCGAGGTGAAAATTCTTA	MTMR2	9.24398	1.13364	6.61703	0.0101008	0.481907
HGLibB_15645	TCCTCACCTTCCGGGGGGAC	ETV7	9.21837	-0.0134126	6.54287	0.0105305	0.481907
HGLibA_45986	TTTGTAAGTATCTGAAGATG	SNRPE	9.21837	0.00492899	6.54171	0.0105374	0.481907
HGLibB_24448	AAGCCAGCTTCTGTTTGCAC	KDELR2	9.11131	1.87593	6.20402	0.0127461	0.481907
HGLibB_19619	GACTCTTACCAAAGATTTGA	GOLGA8O	9.06205	0.0901393	6.41082	0.0113427	0.481907
HGLibB_52939	TCTCTAGGGCTTGGCTCCGC	UNC45A	8.97638	1.82254	6.0367	0.0140114	0.481907
HGLibA_32034	CTGGCCAGCCAGCGCGTGTA	NKX2-2	8.88548	-0.236215	6.28925	0.0121472	0.481907
HGLibA_43912	ACTGCTCCTCATTGAAGATC	SH3BGR	8.80566	2.22896	6.17092	0.0129867	0.481907
HGLibB_56131	CTGAGAGATCACATCAGATT	ZNF544	8.73003	1.69577	5.75933	0.0164013	0.481907
HGLibA_25747	TGGGGGACAGTTGTCACAGC	KRTAP3-3	8.72977	1.36527	5.61147	0.0178433	0.481907
HGLibA_16725	CTAAGCCATCTAATGGAGAT	FAM76B	8.71978	0.783395	6.15552	0.0131003	0.481907
HGLibA_61156	GCTTTTTCCAGGCTGAGTGG	hsa-mir-4765	8.71506	-0.458494	6.16488	0.0130311	0.481907
HGLibA_07026	CTGACTGAAGAGCAGATTGC	CALM2	8.69908	1.27537	5.5641	0.0183324	0.481907
HGLibA_51785	TCTACCTGTGTATTCCGAGT	TRPV2	8.68062	2.04196	5.89822	0.0151562	0.481907
HGLibA_07818	TGCCAGCTCCTGCAGCGATT	CCDC61	8.572	-0.59579	6.05294	0.0138832	0.481907
HGLibB_06628	GAGAATGAGAAAGTGAGTGA	C8orf47	8.55258	1.19833	5.42631	0.0198355	0.481907
HGLibB_43694	ATTGAGCGTCCCGTCTGACG	SFSWAP	8.53724	-0.604067	6.02556	0.0141002	0.481907
HGLibA_56523	TGAAGGGCTACATAGTAGCC	ZNF680	8.50411	1.18155	5.38285	0.0203357	0.481907
HGLibA_18555	ACTGCGAGTGTAATGAGCAC	GALNT2	8.49889	-0.656276	5.99608	0.0143377	0.481907
HGLibA_01559	GCCTGGCCGATCTGATCGAG	ALDH2	8.49202	-0.607704	5.98864	0.0143983	0.481907
HGLibB_31445	GGACTGGAGACCGGACCGAG	NDUFAF3	8.4503	1.04135	5.95437	0.0146808	0.481907
HGLibA_32573	CGTCATAACGAGGCCCTAAA	NR1D1	8.35642	0.943355	5.23918	0.0220837	0.481907
HGLibA_49873	GAGCAAGGTCCGCTACCGGA	TMEM110	8.27019	-0.475984	5.8057	0.0159743	0.481907
HGLibA_49730	GCCCAGCAAGATAACCTACA	TM9SF4	8.14867	-0.634393	5.71237	0.0168458	0.481907
HGLibA_48631	CGGGGTGCGCCGGTCCGTGC	TBR1	8.12867	1.42454	5.09909	0.0239384	0.481907
HGLibA_42014	GTATCGAGGCGGACGACGAC	RPLP2	8.10471	0.688575	5.00808	0.0252293	0.481907
HGLibA_26977	GCGCCTATCGTTGGCCACGG	LOC646862	8.06436	-0.439615	5.63839	0.0175713	0.481907
HGLibB_20750	AAGCACGTTCTCCACGTATG	H3F3A	7.93615	1.81187	5.08982	0.0240667	0.481907
HGLibA_17989	CACGTAGTCACGGTTGGGCG	FREM3	7.90783	0.457915	4.83608	0.0278701	0.481907
HGLibA_01340	AAACCTCATTAAACTTGCCC	AIFM2	7.73517	1.00218	4.68893	0.0303576	0.481907
HGLibA_29079	GTACTTACGGGCCAGGATGA	MFRP	7.69154	0.770401	4.69661	0.0302222	0.481907
HGLibB_55983	AGCGGACCGCGTGCTCACGC	ZNF469	7.66008	0.675731	4.66561	0.0307725	0.481907
HGLibB_11588	TATGTTTATAGCGCCTGTGT	CTCFL	7.61355	-1.04129	5.28891	0.0214617	0.481907
HGLibA_48042	CTACCTCGGCGTCGAACATC	SYS1	7.60986	0.0702223	5.24602	0.021997	0.481907
HGLibA_34755	ACCGCCATCCGCAAGACCAA	OTUB2	7.47701	0.20533	4.4911	0.0340717	0.481907
HGLibB_25334	GGTTCGTGGAGTTTCTGAAG	KPNA6	7.42497	0.237786	4.46136	0.0346699	0.481907
HGLibA_17365	TACCTCCAGGCGAATCCCGA	FGF11	7.40032	-0.0551409	4.45593	0.0347803	0.481907
HGLibB_30844	CACTGTGATGCTGTCCACGA	MYOG	7.38796	2.00531	4.72522	0.0297234	0.481907
HGLibA_25771	AGGCACAGCACAAGGGACGG	KRTAP4-6	7.38225	-1.49981	5.10967	0.0237929	0.481907
HGLibA_57104	GCCCTTTGGGGTGAGGTAGT	hsa-let-7a-3	7.38225	-1.48686	5.10948	0.0237955	0.481907
HGLibB_09628	CTACCTGCTTGTGCGCTATG	CHST4	7.31108	4.01859	7.12847	0.00758692	0.481907
HGLibA_29793	CGCGTCGAAGCGCGGGCGGC	MPZ	7.30594	-0.0199192	4.36576	0.0366682	0.481907
HGLibA_14008	CGTGGTGGTCATATCGAGTA	DSCR3	7.28717	1.10632	4.39906	0.0359587	0.481907
HGLibA_15461	GCCCATCTCGGAAGGCGAGT	ERF	7.23103	-0.0360345	4.31997	0.0376676	0.481907
HGLibB_03088	TCATGAAGCGCATGAACTTG	ARPC4-TTLL3	7.22959	0.104899	4.31216	0.037841	0.481907
HGLibA_36719	GAAGTTGGGCCATCGAGGTG	PIP5K1C	7.22363	-0.149906	4.30665	0.0379636	0.481907
HGLibA_21910	GCGGACACCGCCTACCCCTA	HOXA4	7.22358	0.321598	4.28462	0.0384586	0.481907
HGLibA_14227	GGATCGAATAGCAGCAGAAT	DYM	7.21809	0.84682	4.32301	0.0376004	0.481907
HGLibB_31755	GACCACTGAATCTAGAAATG	NFE2L3	7.20135	0.130416	4.28856	0.0383697	0.481907
HGLibB_26184	GGGGAACATGGAGATTCCAG	LDHA	7.18931	0.95488	4.30542	0.0379912	0.481907
HGLibA_05514	CAACCATGAGAATCTTGCAC	C16orf97	7.14639	1.08599	4.21098	0.040163	0.481907
HGLibB_26419	GCAGAGTGCGACTGTCCCCG	LHX4	7.14002	0.793137	4.25757	0.0390757	0.481907
HGLibA_07783	CAATCGCGCGCTGCGGAGGG		7.0578	1.0481	4.15047	0.041623	0.481907
HGLibA_41933	TCTTCGATTACCTCAAAGCT	RPL30	7.03283	0.669635	4.1059	0.0427338	0.481907
HGLibB_39441	TAATTCTTACCAGTGGGGGA	PTPRC	7.01254	1.19261	4.11777	0.042435	0.481907
HGLibA_10587	GGTCTCCATCTACAACGAGC	COL5A1	7.00902	-0.293773	4.15579	0.0414924	0.481907
HGLibA_12487	TTAATTCGGTCTGGTTCCTT	DCDC2B	6.944	0.549982	4.07585	0.0435005	0.481959
HGLibB_48867	GGGACACTCACCTGGAATGG	TEAD1	6.93592	1.71776	4.19169	0.0406225	0.481907
HGLibB_49795	CATATAGTGATCAGAGATTA	TMEM106B	6.93579	0.153606	4.07733	0.0434623	0.481959
HGLibA_24335	CGTGTTCGACGCCCTCGAGT	KCNK9	6.87617	1.24801	4.04224	0.0443749	0.482677
HGLibA_42401	CAGAGTTCGAATCTCGCGAT	RTN2	6.86749	0.140208	3.97465	0.0461901	0.483083
HGLibA_57414	TTGCCTAGGCTGGAGTACAG	hsa-mir-1254-1	6.83957	1.22113	3.99492	0.0456377	0.482677
HGLibA_59030	ATGCAGGAGCCGCTCTGCCC	hsa-mir-346	6.82967	-0.929131	4.64846	0.0310814	0.481907
HGLibB_42207	GCTGTTAGATCCAGACATAA	RRN3	6.80426	1.9646	4.19832	0.0404641	0.481907
HGLibA_02762	TCCACCGGTGCATATTTGAC	ARHGAP33	6.77559	1.93985	4.18081	0.0408841	0.481907
HGLibB_49858	AAGAAAACTTCCACACTAGC	TMEM128	6.76149	0.317117	3.91948	0.0477298	0.484876
HGLibA_40884	TGCTTGGTGTACAGCTGATA	REV1	6.67355	-0.00449692	3.87641	0.0489693	0.48605
HGLibB_51794	AGATTAGAAAATGCATGACT	TSHR	6.64356	0.470475	3.79302	0.0514667	0.490975
HGLibA_60854	CCTGTATCTGCTGGGCTTTC	hsa-mir-4686	6.63511	2.30003	4.2463	0.039336	0.481907
HGLibA_13462	GCGCAACAGCGGCAGTTCGA	DNAAF2	6.62421	1.70604	3.92857	0.0474723	0.484632
HGLibA_20753	GAGGTGATCATGTCCGGTCG	H2AFJ	6.60337	2.05743	4.06878	0.0436827	0.482009
HGLibB_03164	GGTGCCTCTTCGTCATATGA	ART5	6.59625	1.0188	3.75018	0.0528017	0.493158
HGLibB_50519	TGAATTTCTGAATGAAAAGC	TMF1	6.59615	1.62671	3.89109	0.0485429	0.485583
HGLibA_02191	CCGATGACCACACGCTGCTA	ANO8	6.58193	1.92256	3.98849	0.045812	0.482677
HGLibB_27677	GGACGTCTGCACCGAGGCCG	LYPD3	6.57338	1.38297	3.78987	0.0515637	0.491337
HGLibB_07448	GCCGAAGCCCAAACCGCTAG	CBX4	6.57282	1.35348	3.78077	0.0518448	0.492435
HGLibA_39467	CTGAAGATGGATATTTGCGA	PTPN3	6.57235	0.545313	3.74077	0.0531	0.493158
HGLibA_15687	AACCTAGTGATGCAATCTAC	EVI2A	6.57041	0.990622	3.73183	0.0533848	0.493367
HGLibB_51743	ACTAGTCATCCTAACAGAAA	TSACC	6.55264	-0.704618	3.79142	0.0515158	0.491073
HGLibB_37958	GATTGATGCTAGCACACTCA	PPP1CB	6.50695	-0.60524	3.75295	0.0527144	0.493158
HGLibA_23311	ACCCCAAGCAGAACGAGCTC	INHBE	6.49185	1.1975	3.6992	0.0544385	0.495611
HGLibA_54333	AGTAGCAATTCCTGAAGTGA	WNK1	6.49068	1.5851	3.77961	0.0518806	0.492542
HGLibB_31283	CTGGAGTTGCAAGGACCCAG	NCL	6.47339	-0.646696	4.35411	0.0369198	0.481907
HGLibA_42064	ACTGCGCTCACCTGAAGCAG	RPS11	6.47126	0.704301	3.64569	0.0562146	0.498603
HGLibA_15350	GCAGGACAGCTTCCGACAGC	EPO	6.40524	1.69312	3.74005	0.053123	0.493158
HGLibB_25194	AGCCTGTCGCTGGCTAAGGT	KLHL9	6.35545	0.833385	3.63626	0.0565337	0.498973
HGLibA_44980	TTCCTGAGCACGGTGAACAT	SLC35D2	6.31664	0.461772	3.5107	0.0609737	0.50832
HGLibB_56449	GAATATGAAGAGACATGAGA	ZNF676	6.30577	-1.87006	4.23539	0.0395895	0.481907
HGLibA_02468	CGGAAGATCTGGCGAAGCTC	APOBEC1	6.30574	0.571004	4.19754	0.0404826	0.481907
HGLibA_63696	AGATTCTGAAAATCACTAAC	hsa-mir-6878	6.29662	1.61482	3.63056	0.0567278	0.499197
HGLibA_57447	GCCTAACCCGTGGATTTAAA	hsa-mir-125b-1	6.24717	0.219286	3.48321	0.0619945	0.510193
HGLibB_35107	ATCCACCAATGTAGTCTATC	PAPSS2	6.23834	1.94071	3.70855	0.0541344	0.494803
HGLibA_11338	GAACGCGGTACGACACCTCC	CSF3	6.23585	1.16534	3.4797	0.0621261	0.510327
HGLibB_28533	CAAAATGGCGCGGGTGCTGA	MCEE	6.17688	-0.231318	3.44562	0.0634198	0.513834
HGLibB_10710	TATCATAGCCACCCTGGCTA	COPS5	6.16405	-0.185221	3.42877	0.0640699	0.515469
HGLibA_06988	GGGCTCCAGCGCCGAGTTTA	CALB2	6.12631	0.891973	3.37015	0.0663877	0.520427
HGLibA_18589	GGAGACCAGCGCGTAAACGA	GALR2	6.11968	0.662356	3.36914	0.0664286	0.520512
HGLibA_45881	CCTCATGTACGAGTCCGAGA	SNAP29	6.11048	3.02571	4.4043	0.0358484	0.481907
HGLibA_65181	TTCTAAGCGCCCTGGGGACA	NonTargetingControlGuideForHuman_0798	6.09974	1.06325	3.35656	0.0669376	0.522313
HGLibB_07402	TAGGTCAGTTTAATGCAGAA	CBLN2	6.06911	0.213577	3.31795	0.0685272	0.525922
HGLibB_32217	AGTGCAAGGGACAGAACCCT	NOL11	6.04812	1.46261	3.38059	0.0659684	0.519102
HGLibB_44052	GTAATGCTGTAGCAGTCTGA	SIAH1	6.04422	0.877899	3.30291	0.0691575	0.527211
HGLibA_34157	AGGATGGCGCTATATTGGAG	OR52E2	6.04054	0.438923	3.29414	0.0695276	0.528546
HGLibA_49200	ACTGTCCAGTGCCAGAACGA	TG	6.02879	1.29338	3.33329	0.0678911	0.524399
HGLibA_21931	CGTCGAGATCGCGGCCTTGC	HOXB2	6.02104	-0.0648966	3.29104	0.069659	0.52901
HGLibA_03418	GTCGACGAAATAGTCAAAAG	ATAD5	6.01819	2.62644	3.9289	0.0474631	0.484632
HGLibA_45174	GTGCACTATAGGGATCCCCG	SLC45A2	6.00484	0.171422	3.2682	0.070635	0.531776
HGLibA_22837	CTCGTCGAGCGCCGAGATCC	IGFBPL1	5.97814	0.902817	3.28435	0.0699432	0.529827
HGLibA_23731	GTGGGCAAGTGCTACGTGCG	ITGA3	5.94699	0.827864	3.22574	0.0724888	0.536552
HGLibB_03751	GGTAAGCTCATCGCAGTGAT	ATP6V1F	5.94694	0.699412	3.22369	0.0725796	0.536801
HGLibB_03857	CTCCAAGACGAGTGAAAATC	ATXN7L3	5.93798	2.29219	3.62162	0.0570335	0.500079
HGLibA_29962	TGACGACTGAGATAGAGCAG	MRPL36	5.91512	0.485901	3.18969	0.074104	0.54146
HGLibB_56570	GAATATGAAGAGACATGAGC	ZNF728	5.9087	-0.20207	3.21079	0.073154	0.538139
HGLibA_09049	TATTCAGTCACCAAGCAAAG	CENPC1	5.86769	-0.0601432	3.17649	0.074705	0.543524
HGLibB_43163	TGGTCACACACCGATGCACT	SEC22C	5.8667	0.65465	3.15509	0.0756903	0.545411
HGLibA_61856	TGTTGGTGCAAAAGTAATTG	hsa-mir-548ab	5.84622	0.35373	3.13379	0.0766853	0.547368
HGLibA_15340	TGCCGTCGCGGTCCACGTAC	EPN1	5.84238	1.33633	3.19511	0.0738588	0.540701
HGLibA_59450	TTTAGCAGCCTGAAAACTAT	hsa-mir-378f	5.84056	0.155709	3.13418	0.0766667	0.547313
HGLibB_16859	CACGGTGTCCTCCCCGACAG	FARSA	5.83801	-0.135204	3.15614	0.0756418	0.54531
HGLibB_20235	CATAGACTCCTCTCGAAAAC	GRIA2	5.81435	2.22574	3.5027	0.0612688	0.508909
HGLibB_36525	AGGAAGGCGTGTAGTCTTCA	PIGO	5.76044	1.37139	3.13758	0.0765075	0.546905
HGLibA_30103	CTGATCGGATGGATGCTTTC	MRPS5	5.7547	2.59681	3.65902	0.0557664	0.497595
HGLibB_44810	GTCTCACCACCCAATTTAAG	SLC2A13	5.74077	1.41237	3.11921	0.0773741	0.549169
HGLibA_61395	CAAACACATACTGTATTGTC	hsa-mir-4999	5.73849	1.92013	3.27655	0.0702763	0.530813
HGLibA_61222	TTCCCTCCTAGAGTAAAGAA	hsa-mir-4779	5.73636	1.45446	3.12707	0.077002	0.548292
HGLibB_56340	CCAGCCTCGACCCTGCGCAG	ZNF621	5.73122	0.772914	3.1291	0.0769061	0.547935
HGLibA_06093	TCATCAACGTCTAAGAAACT	C2CD3	5.72543	2.83686	3.84686	0.0498391	0.487961
HGLibA_38800	GATTGCTCATGGAGGAACCA	PRR20A	5.69249	-2.01183	3.73037	0.0534315	0.493441
HGLibB_32589	TCTTGTCGATCTTGCAGCTC	NR5A1	5.68444	-0.123697	3.03591	0.0814411	0.56138
HGLibA_17960	TCGGAGGATACATTCCGTGA	FPGS	5.66737	2.56149	3.55151	0.0594912	0.50499
HGLibA_64672	GGGACTGATATATGGCGAAC	NonTargetingControlGuideForHuman_0289	5.646	0.146816	2.99085	0.0837363	0.568231
HGLibA_60147	AATGGTGGAGCAGATTCGAG	hsa-mir-4436b-2	5.63991	-1.69086	3.68642	0.0548574	0.496044
HGLibA_65254	GCACGAGGTGAACAGCCGCT	NonTargetingControlGuideForHuman_0871	5.63493	0.776314	2.97921	0.0843403	0.570012
HGLibB_46957	ATTCAGGAGGCTGAAGCAAG	SRP9	5.63403	0.291793	2.96632	0.085015	0.571295
HGLibA_28358	AGCAGTGCCCTCGTCGCTGC	MARCKSL1	5.63073	3.49211	4.39281	0.0360907	0.481907
HGLibB_02145	AGAAGGCGAACGACGACTTG	ANKRD9	5.61152	0.893926	2.9776	0.0844244	0.570206
HGLibB_10677	ACCCGGCGCTGCGAAGCCTG	COMTD1	5.60703	0.955362	2.96563	0.0850511	0.571422
HGLibB_30839	GGGTTGGGGTTCGCACCCGC	MYOD1	5.5818	1.32073	2.98218	0.084186	0.569545
HGLibB_34719	GAACAGAGAGAAATTTGAAG	OTUD4	5.5771	-0.77201	2.97888	0.0843576	0.570067
HGLibA_39874	GCGAGCACATGATGGCGATA	RAB31	5.5741	2.40055	3.36586	0.0665609	0.521045
HGLibB_10952	TGATGATGCAACTCAGCAGC	CPNE4	5.56795	0.987796	2.93951	0.0864367	0.574854
HGLibB_23168	TTCACCCGACTGAAAATCAG	IL9	5.56597	0.892036	2.93548	0.0866528	0.575094
HGLibA_32061	GTCAGACGCTGTGCGCTCCC	NKX6-3	5.55644	-1.55777	3.01454	0.0825207	0.564339
HGLibA_21508	ACGCAAGACCGTGACAGCAA	HIST1H4H	5.54473	2.81774	3.64109	0.0563701	0.498697
HGLibA_20590	TGGCTTACCGGAGCCAAATG	GTF3C4	5.53085	1.49099	2.97236	0.0846982	0.570485
HGLibB_46288	CACAAGGAGAAGGCTGGTGA	SPAG11A	5.52289	1.78468	3.04152	0.0811599	0.560492
HGLibA_29023	TATACATGTCGCCTTCACAC	METTL9	5.51458	1.9168	3.08918	0.0788143	0.553764
HGLibA_10455	CCCTTACTGTCCCCGAGCCG	COA6	5.50173	2.20332	3.21312	0.07305	0.537886
HGLibA_20812	ATCTTCCCACTGCATCAAAA	HADHB	5.49142	0.751308	2.86633	0.0904508	0.584688
HGLibB_16420	TGCGAAATGGGAAGCCTCGA	FAM209B	5.47389	1.04261	2.85949	0.0908364	0.585778
HGLibB_18342	ATGAACTTATCCAGTCACTT	GABRA5	5.46206	1.0121	2.85848	0.0908934	0.585888
HGLibA_49153	ATATACCCCTGCACCAGCAA	TFDP2	5.45817	0.545438	2.84396	0.0917181	0.587908
HGLibB_18992	AATTGCCTGAGGAGCTATCG	GGT6	5.44466	1.39552	2.88777	0.0892547	0.581759
HGLibB_02968	AGATGATGCCGTCCGTGCAG	ARL4C	5.43771	0.968503	2.83422	0.0922757	0.589647
HGLibA_34205	CCCAGTTTGATCACGACCGA	OR52R1	5.43698	2.0447	3.0672	0.0798871	0.556636
HGLibB_37463	ATTAGAGCTTGAAGATAAAC	POLE2	5.42809	-0.683115	2.87142	0.0901653	0.583891
HGLibA_64230	ACACCTCTTTGGGTGAAGGA	hsa-mir-888	5.42649	2.36895	3.22055	0.0727191	0.537212
HGLibA_55979	GAATATGAAGAGACATGCGA	ZNF430	5.4194	2.22214	3.12898	0.0769117	0.547935
HGLibA_43732	ACGTTTCACCACATTGTAAG	SFR1	5.41632	3.33412	3.9878	0.0458309	0.482677
HGLibB_30091	AAGCTACGAAGAACTCCAAG	MS4A12	5.41512	1.5213	2.88829	0.0892254	0.581717
HGLibB_55382	TCCAACTTGCTGATAACATC	ZNF12	5.40139	0.994288	2.80291	0.0940934	0.594982
HGLibA_29916	GGGTTCCGGTTGGTGAATTC	MRPL18	5.40075	0.906523	2.8022	0.0941349	0.594982
HGLibB_36201	AACTTCACGGGTGCCCACTC	PGLYRP1	5.39913	2.02181	3.02613	0.0819334	0.562421
HGLibA_65130	GCCAGCGGGGATATGGTGAA	NonTargetingControlGuideForHuman_0747	5.3989	0.427023	2.79565	0.0945207	0.595781
HGLibB_20856	CACTTACACTGTTGAGAAAG	HAUS4	5.39793	2.62317	3.35127	0.0671533	0.52256
HGLibB_48686	GCTCTGGCGAGATGGCGGCA	TCEB3C	5.38957	-2.42962	3.48298	0.0620031	0.510193
HGLibA_40329	ATGTCCTTCTGGGCGGCTGG	RASGEF1A	5.37239	1.84401	2.93966	0.0864287	0.574854
HGLibA_02479	AGGAGCCCGCGTGACGATCA	APOBEC3B	5.36949	-0.388215	2.8208	0.0930503	0.591531
HGLibA_45720	GCGCGTGAGCGTCTTGCAGA	SMIM10	5.36727	1.40223	2.825	0.0928071	0.591047
HGLibB_33945	GTGGATAAGGCCAATGATAG	OR4F15	5.36694	0.853652	2.78046	0.0954207	0.598535
HGLibB_05924	CGGGCACGGCCAGCGGCGTC	C1QL2	5.3648	-0.241914	2.84225	0.0918154	0.588346
HGLibA_61940	GATTGGTGCAGAAGTAATTG	hsa-mir-548ax	5.36479	-0.124467	2.83849	0.0920307	0.589011
HGLibB_31517	ACTCGGGTGATAGCGTGCGA	NDUFS6	5.35695	2.80924	3.49744	0.0614638	0.509719
HGLibB_07816	GCGACTCCTGCTCCAAACTA	CCDC63	5.35348	1.29033	2.80121	0.0941934	0.59505
HGLibA_44648	ACCAAACTCAGCCACGATAG	SLC25A14	5.34979	2.26547	3.09301	0.0786295	0.553137
HGLibA_45462	CACCCATCGGGGGTCCTTTA	SLCO2B1	5.34837	1.17774	2.77841	0.0955431	0.598876
HGLibA_43672	CGGGTAAATGTTCGCGGAAG	SETMAR	5.33981	0.20756	2.73993	0.0978691	0.606048
HGLibB_13712	TTAAGATGAATATATGAAGC	DOCK1	5.339	0.976019	2.75358	0.0970372	0.603502
HGLibB_38493	CGCGGCGCACCGCGCGCTCT	PRKCDBP	5.33707	-0.752658	2.79619	0.0944887	0.595779
HGLibB_40963	GCCTACCACTCGGCCGTCCA	RGMA	5.33634	0.368118	2.74131	0.0977845	0.605798
HGLibB_01624	GGACTCGGTTCCCAAGCCGT	ALG2	5.33611	1.36134	2.79923	0.0943094	0.595412
HGLibB_20663	TGGCCGGATTGCTTCAATAG	GYG2	5.32598	-0.431161	3.41301	0.0646842	0.516999
HGLibB_28534	AAGCTTGCTCCAGTTCCACA	MCEE	5.32182	1.05903	2.74916	0.0973055	0.604375
HGLibB_13265	TGGCACTAATACTCCAACCA	DISP1	5.31326	2.67917	3.31013	0.068854	0.526689
HGLibA_55050	ACAGAGCGAATGGTCACAGT	ZCCHC9	5.30726	2.22889	3.0386	0.0813062	0.560869
HGLibA_44787	ATACACGAAGCAGCCCATGA	SLC26A11	5.29381	-0.379055	2.79251	0.094706	0.596336
HGLibB_27601	GCTGCCTCTCCTGCCTGCGC	LUZP2	5.29188	1.54965	2.79565	0.0945205	0.595781
HGLibA_27990	GTAACCGATGCTCTAAAGAC	MAGEH1	5.29177	0.757847	2.72259	0.0989374	0.609095
HGLibB_48494	TTCGCCTCCCGCGCAGTCAG	TBC1D3H	5.28745	1.22021	2.74085	0.0978126	0.605915
HGLibB_15678	CCGCTCCACCTGGTCGGCGT	EVPL	5.28471	1.34531	2.76951	0.0960758	0.600455
HGLibB_48741	GGACTGCCAAGCGCCTTGTG	TCFL5	5.28381	0.862439	2.70914	0.0997749	0.610906
HGLibA_28546	GACGTACCTGTCGACGGCGA	MC3R	5.26985	0.926524	2.70213	0.100214	0.612253
HGLibA_28210	GCCAACATCGTGGCCTACCA	MAP4K1	5.26316	1.03053	2.69615	0.100591	0.613402
HGLibA_63886	GTTGGGCAAGGTGCGGGGCT	hsa-mir-744	5.25277	-0.292811	2.76915	0.0960974	0.600555
HGLibA_03477	ACCCTCAGTGCGACCAGTGA	ATG16L2	5.25258	1.585	2.77445	0.0957797	0.599636
HGLibA_47803	ATATACCATCGCTGTAAAGG	SUPT16H	5.25258	1.00881	2.69168	0.100874	0.614141
HGLibA_41130	GGGAGGGACACCGCCCTAGA	RHBDD3	5.25228	2.42291	3.09069	0.0787415	0.553559
HGLibA_26345	TCGCCGTGGGCGTTGAAGCG	LGALS1	5.24532	0.805442	2.68219	0.101476	0.616038
HGLibA_36151	AAGTTTCTGCCTCCCCGACA	PFDN6	5.2453	0.290032	2.6655	0.102546	0.618895
HGLibB_42598	GAATGTCTCGGCGAAAGCAG	SALL2	5.24528	2.72557	3.28159	0.0700612	0.530097
HGLibB_45887	GACGGTCCGAGTGTGCAAGA	SNRNP25	5.22609	1.39051	2.71609	0.0993411	0.610016
HGLibB_03390	CTTCAAGTTATCCAGAGAGA	ASXL2	5.2208	0.513277	2.65191	0.103426	0.620999
HGLibB_14378	AGCCGCGGCCCACCAGCGCG	ECHDC3	5.20879	-0.760869	2.74255	0.0977085	0.605441
HGLibB_31617	TGTGCATCCTCCTGACCCAC	NEK6	5.20814	2.66371	3.20191	0.0735524	0.539954
HGLibA_13168	TTCGACAGCGGGACAAGGAT	DHX16	5.19728	0.188056	2.63512	0.104524	0.624125
HGLibA_56424	GTTCTGTTCGAAGTCACGAG	ZNF627	5.18735	0.535955	2.62334	0.105303	0.626144
HGLibB_25008	AGAGGCACCGAAGTTGAGCA	KLF10	5.18661	0.78714	2.63195	0.104733	0.624692
HGLibB_23913	CCAGCTGACACAAAGATATC	JHDM1D	5.16166	3.0557	3.46119	0.0628252	0.511928
HGLibA_01549	GGTAGGGTTGACCGTCGGGA	ALDH1B1	5.15367	-0.756599	2.63829	0.104316	0.623766
HGLibA_22322	CCTTGCTGAACGGAACCGGG	HSPB9	5.14078	-0.0476154	2.60736	0.106369	0.629283
HGLibB_57706	AAACCTAGCCCCAATACTTA	NonTargetingControlGuideForHuman_0678	5.14044	0.89546	2.59869	0.106952	0.631072
HGLibA_63633	GAGGGCCAGAGAGCTGGGTG	hsa-mir-6862-2	5.13431	0.944983	2.59416	0.107258	0.631968
HGLibA_48829	AGACATACCTCCAGAAGCTT	TCP1	5.13172	1.91574	2.76865	0.0961272	0.600605
HGLibA_62471	CGCTTCCTCCAGACACACCA	hsa-mir-595	5.12193	1.33897	2.6248	0.105206	0.625845
HGLibA_11388	AGAGGGGGACTACAACGTCA	CSNK1D	5.12133	0.532653	2.57773	0.108377	0.635778
HGLibA_57676	TGTTCTGGAATTCTGTGTGA	hsa-mir-1299	5.1164	0.310817	2.56713	0.109106	0.638022
HGLibB_04730	ATCTTCCAATGTGTGTCCAC	BPIFB6	5.11019	0.965025	2.58005	0.108218	0.635313
HGLibA_03473	CAATTTAGTCCCGGACATGA	ATG16L1	5.1087	0.496732	2.56176	0.109477	0.639138
HGLibB_23299	CAACTCACCGAGCTCAGGTA	INO80E	5.10598	1.4952	2.63758	0.104363	0.623912
HGLibA_49851	AGACCGAGGTGGGGACCCCT	TMEM105	5.09966	1.42104	2.61815	0.105647	0.627205
HGLibB_06011	GCGCCCACTGGGAGGACGCC	C20orf202	5.0916	0.554906	2.55209	0.110149	0.64051
HGLibB_03408	TCACCTGATGGACTCCAAGA	ATAD3A	5.07849	1.99191	2.75118	0.0971827	0.603921
HGLibA_48351	GGAGGCCGTGGCGTCGCGCC	TARSL2	5.06607	0.916993	2.54207	0.11085	0.641886
HGLibB_27306	GGAGGAGTCCTCGGAACGCA	LRRC3C	5.06568	1.45354	2.59598	0.107135	0.631551
HGLibB_30734	GCTGGACGCCATGCTGCAAG	MYL7	5.06338	0.070933	2.53368	0.11144	0.643688
HGLibA_46401	TCGGGGGCTAAGTCCCTGTT	SPANXN1	5.06248	0.886636	2.54019	0.110982	0.642265
HGLibB_31272	CCATGACATCCACAAATGAC	NCKAP1L	5.05793	2.02811	2.74519	0.0975473	0.605042
HGLibA_07784	CCGGACGAGGTGCTCGCACA	CCDC42B	5.04899	-0.0635408	2.53962	0.111021	0.642359
HGLibA_64479	TACCCTCCGGATACGGACTG	NonTargetingControlGuideForHuman_0096	5.04625	0.184739	2.51588	0.112705	0.647294
HGLibB_31358	GAAGTTACCCACCCGGGATG	NDNF	5.04511	0.748759	2.5302	0.111686	0.644134
HGLibA_09387	AGCAGGACTTACGGCAGTGG	CHD1L	5.04357	-0.886869	2.5614	0.109502	0.639228
HGLibB_06165	ATCGCAAAGTAGGGGACTCG	C2orf70	5.03179	1.98258	2.70934	0.099762	0.610906
HGLibB_20889	GCTGAGAAAAAGTGCCCTTG	HBD	5.02619	0.610813	2.50827	0.11325	0.648891
HGLibA_33720	AATGGGGGAAAATCAGACAA	OR2A1	5.01407	-0.714622	2.59142	0.107444	0.632499
HGLibA_62947	ATATTGCAAGAATGATAAGA	hsa-mir-653	5.01404	-1.37412	2.59971	0.106883	0.630821
HGLibB_23687	GTGCAGCAGCACGACATCAG	ITGA11	5.0132	1.75803	2.62399	0.105259	0.625947
HGLibB_33899	AAGGTAATTGACAGATGAAG	OR4C13	4.99428	1.79995	2.61917	0.105579	0.627053
HGLibB_34813	TTTCAGGGAGCCATTCCTGA	P2RX5	4.99203	1.785	2.61373	0.105942	0.628043
HGLibA_31518	TACAACGATCCCAACCGCCG	NDUFB4	4.98478	-0.746064	3.13162	0.0767872	0.547603
HGLibA_65257	TCATGCTTGCTTGGGCAAAA	NonTargetingControlGuideForHuman_0874	4.98453	1.82529	2.6243	0.105239	0.625947
HGLibA_58688	AGAGAGAAAGATCTGGAAGT	hsa-mir-3156-1	4.97931	0.88391	2.47671	0.115544	0.655632
HGLibA_07437	ACCAGGGTCTGCTAATCCAG	CBWD3	4.96943	0.819225	2.46672	0.11628	0.657665
HGLibB_15310	CCATGAAGCAGCAGCATAAG	EPHX4	4.96597	2.87421	3.12678	0.0770157	0.548292
HGLibA_60462	CTCAAACTAAAGGATATAGA	hsa-mir-4509-1	4.96474	-1.4776	3.12393	0.0771506	0.548566
HGLibB_24727	GCGACCTGCAGAGCAAAGCC	KIAA1456	4.95979	2.3339	2.79085	0.0948039	0.596578
HGLibB_03485	AAGCAGCATCTCCTTAAAAC	ATG4A	4.95957	2.40669	2.82651	0.0927194	0.590806
HGLibA_42247	GTGTTGTACCTACGTCAGGA	RRH	4.95669	0.910287	2.45826	0.116908	0.65956
HGLibA_02927	AGATATCCTCGTGTACGTGC	ARL11	4.95427	1.53932	2.53068	0.111652	0.644047
HGLibA_09155	AGTCATACAGGCGATCTGCG	CEP68	4.94587	1.68935	2.55429	0.109995	0.640379
HGLibB_06073	AAAATAATATGGAGACGGCA	C22orf42	4.94557	2.42729	2.82394	0.0928681	0.591072
HGLibA_36681	GCTCCGTGATAAAGTCGAAG	PIM3	4.94161	1.7689	2.57012	0.1089	0.637293
HGLibA_23737	TCTGTGCGCCAGCTGTACAG	ITGA5	4.94148	3.93933	4.02275	0.0448906	0.482677
HGLibA_59449	AACAGAACGAGCACTGGACT	hsa-mir-378f	4.92932	-0.0927321	2.4387	0.118374	0.664478
HGLibB_24096	CTGTGCAATGTAGTTACAGC	KCNA2	4.91602	1.54652	2.50063	0.113801	0.650269
HGLibB_47076	TGAAGACTCCGCTGGCCTTG	SSH1	4.91435	2.58248	2.88085	0.0896387	0.582754
HGLibB_11929	AAGGCGAAAAGACCCCTTCG	CXorf51B	4.91191	0.409195	2.41145	0.120451	0.670213
HGLibB_31438	GGTCCAAACTGTCTAAGCCC	NDUFAB1	4.90831	0.7476	2.41815	0.119937	0.668492
HGLibA_46948	GCGCTGCTGACCGACATCGA	SREBF1	4.90368	1.61497	2.50726	0.113323	0.649003
HGLibB_54712	ATCTACCGCACAAATCTTGA	ZAR1	4.88169	2.25157	2.68518	0.101286	0.615478
HGLibA_16127	AACACGCCCAAGTATCATGA	FAM134B	4.8805	1.58161	2.48316	0.115071	0.654559
HGLibB_21794	ATAAGGACCTGGCCGCTGCA	HNRNPH1	4.87911	2.24994	2.68269	0.101444	0.615979
HGLibB_53927	AAGGGACCCCATGAGAAGTA	WBSCR17	4.87663	1.30425	2.43149	0.11892	0.665779
HGLibA_06061	GCGGGCAGCGATGCCTGCGT	C22orf26	4.85573	1.91921	2.5503	0.110274	0.6408
HGLibA_55473	TTCATGTGTTCGAAATCTAC	ZNF136	4.85269	1.36977	2.41818	0.119934	0.668492
HGLibB_41742	TGAAAGCTGAGGATGCTCAA	RP2	4.83581	2.8034	2.95426	0.0856516	0.572955
HGLibA_21101	CGATGCCAGCTCGTACTTTG	HECW1	4.83496	1.52774	2.43681	0.118517	0.664723
HGLibA_08559	CCTTGGCAGGCATAACGAGA	CDC42BPB	4.83005	0.813178	2.35948	0.124524	0.683087
HGLibB_09612	CGGGCACTCACCCGGGCGCA	CHST13	4.81646	-0.320529	2.36487	0.124094	0.681693
HGLibA_57533	TGCTTGAACCCGGGTGGTGG	hsa-mir-1273a	4.81428	1.49534	2.41363	0.120284	0.669653
HGLibB_13929	GGGCTGCTCACCTCTGAAAG	DRAP1	4.81325	1.21362	2.37229	0.123506	0.67968
HGLibA_36383	CCTACAAGACAGCGCAAATG	PHF6	4.81249	1.80938	2.47913	0.115366	0.655081
HGLibA_42192	CCGCAAGAAGGGAGCCAAGC	RPS8	4.80933	0.861738	2.34521	0.125669	0.686464
HGLibA_55720	CAACCCTTGCACGCCATCGT	ZNF28	4.80288	0.830863	2.34857	0.125398	0.685779
HGLibA_28908	CCCATCTACATCGAAGTACA	MERTK	4.79833	1.67107	2.43487	0.118664	0.665112
HGLibB_50776	GCAACTTCTCAATAACACTC	TNIP2	4.79073	2.75287	2.87757	0.0898215	0.583216
HGLibA_31402	AAATACCTCGTTCGACTGAA	NDNF	4.78525	3.64079	3.57055	0.0588128	0.503363
HGLibB_48426	CTGCGGTTCCCGGACAGCAA	TBC1D16	4.78444	1.63014	2.41645	0.120067	0.668843
HGLibA_58869	CCTGCGTAGGATCTGAGGAG	hsa-mir-3193	4.78425	0.922119	2.32724	0.127127	0.690575
HGLibA_16610	GCTTCCCATAACTCGTCGAA	FAM47B	4.77938	2.27556	2.61031	0.106171	0.628722
HGLibB_25713	CTGTTATTCCACTAAGTAAC	KRTAP4-1	4.77161	0.069192	2.31659	0.128	0.693699
HGLibA_37956	TTTGATTTGTTACGGGCCAA	PPIP5K2	4.77091	0.298655	2.30183	0.129221	0.697744
HGLibB_07209	CTGCTGGGATTCCATCCACG	CAPZB	4.76543	1.23225	2.33679	0.12635	0.688019
HGLibB_27382	AATGCAATATTTGAGATAGA	LRRC72	4.76496	0.693483	2.3094	0.128594	0.695526
HGLibA_21361	CGCTTTGCGCTTAGCAGCGC	HIST1H1B	4.7596	2.19163	2.55588	0.109885	0.640266
HGLibB_08292	AAATGGCTATGGAATCCTGC	CD226	4.75664	0.39527	2.29226	0.130021	0.699323
HGLibB_30709	GAGGAACATGGTGAAATTGA	MYL12A	4.74637	2.10721	2.51416	0.112828	0.647676
HGLibB_03736	TAAGAAAGTAGCTCAATACA	ATP6V1C1	4.74497	1.57743	2.37365	0.123399	0.6794
HGLibA_51076	TTAGATGAAGTGCGCCTGAG	TP53RK	4.74486	1.18763	2.31715	0.127954	0.693518
HGLibA_63549	CACTTTTATTCCTGAGGAAA	hsa-mir-6843	4.7399	1.75605	2.40737	0.120765	0.6715
HGLibB_27934	CCCTCCTGCAGACATGCTGA	MAGED4	4.73591	3.70349	3.56425	0.0590364	0.503982
HGLibB_51285	CATCGTTATGTTTGATTTAG	TRDN	4.73427	1.75472	2.40219	0.121166	0.672913
HGLibB_55101	CTCAGATATTCTGTCTGAAA	ZFC3H1	4.73176	1.19131	2.30696	0.128796	0.696295
HGLibB_55141	TCATCGGCGCTCAGAATAGG	ZFP36L1	4.71959	1.99976	2.46781	0.1162	0.657487
HGLibB_15846	GATCGTATGCATTAAGTGTC	F2RL2	4.71576	2.85622	2.87604	0.0899069	0.583478
HGLibA_09340	TCGCCCTTACCAATAACCCC	CHAD	4.70935	2.11457	2.48723	0.114774	0.653546
HGLibA_33095	TATCTCAGTCTCATCACAAG	NUSAP1	4.70352	0.92547	2.27387	0.131571	0.703834
HGLibB_28872	GCTATCTTCATGCTTCGCGA	MESDC2	4.69711	2.03366	2.45187	0.117385	0.66099
HGLibA_16174	ATATCCATGTAGCGACAAGA	FAM154A	4.69275	2.81848	2.82979	0.0925305	0.590304
HGLibB_33946	AATTAACAAGAAATGCCAGT	OR4F16	4.68997	-0.408832	2.2678	0.132087	0.705381
HGLibB_31828	AGCGGCGATAGCTGCACGCG	NGF	4.68892	0.58149	2.25652	0.133053	0.707584
HGLibA_05332	CGAGAGCCGTCAACTTGCGT	C14orf166	4.68646	1.38565	2.2926	0.129992	0.699273
HGLibB_22488	CTCGAAGGCTGCTGAAGAGC	ICOSLG	4.67084	0.132594	2.23244	0.13514	0.71378
HGLibB_42700	TACCAGGCAAACCAGGACAG	SARS2	4.66974	1.14472	2.25734	0.132982	0.707393
HGLibA_62395	TCATGACATAAGCCAGTGGC	hsa-mir-575	4.65371	1.90644	2.3804	0.122866	0.677978
HGLibA_49087	CAACGTAGGCGGAACACACC	TEX28	4.63303	2.0265	2.39828	0.121469	0.67384
HGLibA_18498	ATGCAGCGGGGGCACGGCAT	GAL3ST1	4.63252	2.42106	2.55025	0.110277	0.6408
HGLibA_43863	TCCGCAGGTGAAGCAAATCA	SGSM2	4.6319	1.84906	2.34762	0.125475	0.686028
HGLibB_45834	TTAAAGTCAAAAACTAATGA	SNAPC1	4.62462	2.68371	2.68104	0.101549	0.616277
HGLibA_55261	TACACCTACCCCACGGCGAC	ZFR2	4.61705	1.81597	2.32637	0.127198	0.690868
HGLibA_47084	TAGCCGTCGCGATCGCGACG	SRSF6	4.61476	0.94265	2.20223	0.137812	0.721831
HGLibB_26095	TGGAGCTCTGGCGCCGGCAT	LCE3B	4.61208	1.52501	2.2616	0.132617	0.706568
HGLibB_57407	CCTTGGCGAGACGGAGGTAC	NonTargetingControlGuideForHuman_0379	4.59207	2.23199	2.43498	0.118655	0.665095
HGLibB_22792	ATCCCCAACTGCGACCGCAA	IGFBP4	4.59178	1.12049	2.19554	0.13841	0.723911
HGLibB_16617	GGTGCTGAGTGAAAGCGAAG	FAM53C	4.58859	1.51202	2.23981	0.134498	0.711738
HGLibA_14224	TGTGTCCTCCTGCATGAATA	DYDC2	4.58758	-0.344953	2.19923	0.13808	0.722743
HGLibB_28506	ACCACAGCATCATGACCGTG	MC3R	4.58146	1.11462	2.18605	0.139266	0.726326
HGLibB_11170	GGTTGAGCGTATGCATGAGC	CRKL	4.57865	2.35872	2.47877	0.115393	0.655096
HGLibA_23711	CACCGTCAAAGGCGACAATG	ITFG3	4.57277	2.32492	2.45818	0.116914	0.659565
HGLibB_47067	AGGACTCACATAGTCCTGGA	SSBP4	4.56098	1.98667	2.32989	0.126911	0.689988
HGLibA_56066	AGATTTATGGCTAAAAGACC	ZNF479	4.56012	0.693217	2.15528	0.14208	0.735227
HGLibB_49054	ACGAAGATGATTACAGTTTA	TEX9	4.55841	1.83571	2.28637	0.130515	0.700619
HGLibA_42843	GCTGCAGCTCTCGCTCCCTT	SCAMP3	4.55234	1.56276	2.22192	0.136064	0.717007
HGLibA_51892	GAGCAAGTGTGCCCTCGTGA	TSPAN1	4.54002	2.31435	2.4256	0.119368	0.666719
HGLibB_40734	GCCTTATAGGAAGCATAAGC	REEP4	4.53427	-0.305315	2.15238	0.142349	0.735922
HGLibB_08020	CGCAGTGTAAGAAAAGCAGC	CCL4	4.53052	2.10442	2.3387	0.126195	0.687811
HGLibB_30392	ACCAGCAACAAGTCATTAAC	MTMR6	4.5303	2.07797	2.32963	0.126932	0.690037
HGLibA_18912	GGATGCCAACCCGCCCCTGA	GEMIN2	4.52706	2.75413	2.63569	0.104487	0.62411
HGLibB_06003	ACGGCTACGGGCACAGCCAC	C20orf197	4.51833	1.54371	2.19389	0.138559	0.724304
HGLibB_22181	CCCCATACGAAGCAGTGCAC	HSD3B7	4.51258	2.9288	2.73138	0.0983945	0.607507
HGLibB_05276	CGCCATGGGGACTCCGGCTT	C12orf65	4.51104	2.14271	2.33372	0.126599	0.688905
HGLibA_34963	ACTGTGAAGCGGATCGACGA	PACSIN2	4.50507	0.973663	2.12528	0.144886	0.743449
HGLibB_41510	AAATGGCACAGACATCATAC	RNF167	4.49153	2.24802	2.36312	0.124233	0.682068
HGLibA_19618	GTTTACCTGTTCCTTGGCCT	GOLGA6L1	4.48685	0.40745	2.0928	0.147995	0.752946
HGLibB_56264	CTGAGCAGAGAGCCTCAGCG	ZNF587B	4.48449	1.66761	2.19307	0.138633	0.724453
HGLibB_57664	ATGCGAAACGACATTTATTA	NonTargetingControlGuideForHuman_0636	4.48368	2.2161	2.33821	0.126235	0.687909
HGLibB_33221	GGTGCCTGTCGTGTCTTCGC	OCSTAMP	4.47949	1.11687	2.1115	0.146196	0.747435
HGLibB_02823	ACAGGACATGCGGAAGCACG	ARHGEF17	4.47913	1.40927	2.13738	0.143747	0.739978
HGLibA_15714	GGAAACGTCCAGCACCGAGC	EWSR1	4.47424	1.98573	2.26037	0.132722	0.706749
HGLibB_02660	CAGGCAGATCCAGATGCCGT	ARFGAP1	4.47265	1.61312	2.17153	0.140586	0.730545
HGLibA_40129	CAGCGCCGGGCATCAGATGA	RAF1	4.46744	2.27846	2.35612	0.124793	0.684099
HGLibA_52096	GGGCATCGGCATGACGTCCA	TTC28	4.46474	1.08213	2.09556	0.147727	0.752109
HGLibB_00814	ATATTCATCAAACCTTAGAT	ADAMTS18	4.44411	1.82794	2.19352	0.138592	0.724394
HGLibB_53388	CTTCTTACAAAAAGCCACAT	UTP6	4.43948	1.40621	2.10757	0.146572	0.748588
HGLibA_43139	TTAACGAGCCTAGTAATGAC	SDHAF2	4.43853	-0.364002	2.0788	0.149358	0.756953
HGLibB_37563	TTGGCTCACAGGAAAAATGG	POLR3B	4.43775	1.49345	2.12148	0.145246	0.744572
HGLibA_04178	GAGCGCCCGGCATGTCGCAA	BATF3	4.43568	1.38482	2.10281	0.147028	0.75009
HGLibB_35747	GGGACACCCACCTGGGCAAA	PDE4C	4.4342	4.17404	3.55878	0.0592314	0.504642
HGLibB_37847	GATGGCAAGCATGTGGCCTT	PPIAL4A	4.4328	0.52652	2.05714	0.151494	0.762642
HGLibB_02600	CACCTACCACGTTGATCCCA	AQP6	4.43278	3.12349	2.78397	0.095212	0.597787
HGLibB_35066	TGTGGCGTTTCGGCTCAGGA	PANX2	4.43129	5.80515	3.83359	0.0502353	0.488382
HGLibA_22969	GAGTATACTCAGTGTATAAG	IL12RB2	4.42881	-0.341456	2.0858	0.148674	0.755043
HGLibA_36458	GCTGATACACGGCAGTGCTC	PHRF1	4.42875	-0.110204	2.0681	0.150409	0.760087
HGLibA_29974	GCTGCGCAAAGTCGAGCTCC	MRPL4	4.42044	2.44781	2.3804	0.122866	0.677978
HGLibB_30250	CCCGCACTCACTCTTCTTGC	MT1H	4.41887	1.1968	2.07327	0.1499	0.758668
HGLibA_62548	GAGTAAAAATTCCATGGGGT	hsa-mir-6074	4.41031	0.231007	2.03765	0.153446	0.768731
HGLibB_08175	GCGGTGCGCAAATCCCTGCA	CCS	4.40867	0.64426	2.04856	0.15235	0.765396
HGLibB_57295	CTCGGCCCACTTGCGTTATA	NonTargetingControlGuideForHuman_0267	4.40734	2.86535	2.59246	0.107373	0.63233
HGLibA_55643	ACTAGATGTGATATTACAGT	ZNF233	4.40277	1.53553	2.10292	0.147018	0.750082
HGLibA_44041	CACGCTTACGACGTGGTCGG	SHISA5	4.40255	0.904625	2.04455	0.152752	0.766653
HGLibB_14764	TGGGTCTGGTTGTAGAAGAT	EIF3H	4.40041	-0.463543	2.053	0.151907	0.763941
HGLibB_57853	CTTCCTGCGTGGCTTTAAAC	NonTargetingControlGuideForHuman_0825	4.39272	-2.09195	2.65304	0.103352	0.620791
HGLibB_33907	CTGTGACTTGTACCCTTTGC	OR4C3	4.38879	1.06416	2.03872	0.153338	0.768455
HGLibB_18199	GACTGGGGAACCCGATGAAG	FXYD1	4.38699	0.888292	2.03128	0.154091	0.77089
HGLibB_28496	CAGCAGTTTGCCATCTTATG	MBTPS2	4.38046	0.727153	2.02313	0.154919	0.773181
HGLibA_33338	TCTCTTACCTTGCTGGTTTG	OLA1	4.37739	1.49335	2.07574	0.149658	0.757772
HGLibB_01728	TTAAGAGTCAACCATAATGA	ALS2CR8	4.37504	2.57422	2.3993	0.121389	0.673648
HGLibB_26069	ACTGCAGCATCCCCCAGAGC	LCE1C	4.37184	2.30813	2.28316	0.130785	0.701541
HGLibB_11414	GAAGAATGTACGCTTTGACC	CSRNP2	4.36499	1.57386	2.66956	0.102284	0.617932
HGLibA_57412	GTGCCACTGTACTCCAGCCT	hsa-mir-1254-1	4.36482	-1.17169	2.62792	0.104999	0.625225
HGLibB_16223	GTATTTACTGAAAGCCGCAG	FAM168A	4.36043	2.24925	2.26219	0.132566	0.706568
HGLibA_26037	AGACATGAACGCTCTCGCTC	LARP4B	4.36023	2.76757	2.492	0.114426	0.652515
HGLibA_32318	GCAGCCCACACGCGACAAAG	NOP9	4.35532	0.84879	2.0161	0.155638	0.775155
HGLibB_17809	GGCGTCGCAAGCGCTTCAAG	FOXD2	4.34934	3.68259	3.10475	0.0780641	0.55146
HGLibB_29534	GGCCCGTCTGCCGCAGCACG	MNT	4.34913	0.455744	1.99543	0.157774	0.780666
HGLibA_21698	ACTCGACAAAGCCCGATACC	HMGB4	4.34897	3.48286	2.95118	0.0858147	0.573267
HGLibA_13298	CATGCCCGCAGATCGATTGG	DKK2	4.34789	2.88215	2.54762	0.11046	0.641226
HGLibB_56444	GACTGTGAAGAGACATGAGA	ZNF675	4.34658	0.930955	2.00252	0.157038	0.778997
HGLibA_49735	GGAACACTTACCTTCGCGGC	TMA7	4.34237	2.0807	2.18208	0.139626	0.72737
HGLibA_57487	TGTCCCTCAGGGCATAGAAC	hsa-mir-1266	4.34136	1.75688	2.09832	0.147461	0.751141
HGLibA_58797	CTGCTGTAAGGCACAGCAGA	hsa-mir-3179-3	4.33366	1.84427	2.11692	0.145679	0.745944
HGLibB_25866	ATGGTACCAACTGCTCAAGA	L3MBTL3	4.33205	2.78123	2.4742	0.115728	0.656069
HGLibA_08666	ATTGACGTCGGTGACTACGA	CDH22	4.3302	1.93106	2.13137	0.144312	0.741502
HGLibA_28832	TTTCAGCGCCGTGAAGAACC	MEF2BNB	4.31925	2.36836	2.26297	0.1325	0.706481
HGLibA_03185	GGACTAAGGCGACGCAACTC	ASAH1	4.31894	2.24644	2.21611	0.136577	0.718656
HGLibB_45109	GCAAAACGCACTGAAAGAAC	SLC44A3	4.31469	1.87854	2.10554	0.146766	0.749205
HGLibA_63638	GCCTCATTAACATTTTCAAC	hsa-mir-6863	4.30713	1.58442	2.04013	0.153197	0.76803
HGLibB_31140	AAATCCTACCTGAGTGAGCG	NAT8	4.29974	1.88372	2.09594	0.147691	0.752004
HGLibA_12876	CCTGCCAAACTTACTGCACA	DEFB124	4.29346	2.3316	2.22992	0.135361	0.714636
HGLibB_41894	TCACCTTGTAGAATTTCCTG	RPL35	4.2914	0.909909	1.96389	0.161097	0.790776
HGLibA_25639	AGGTGACAGGTCTATAGACC	KRTAP12-4	4.28952	1.40345	1.99694	0.157617	0.78041
HGLibB_44757	TGAGCCCTCACAGGGCGGTC	SLC26A9	4.28534	2.13008	2.14703	0.142846	0.737183
HGLibA_62394	AAGGTCATGACATAAGCCAG	hsa-mir-575	4.27918	0.955884	1.95523	0.162024	0.79369
HGLibA_24716	CAATGCCATTCCCATGAATA	KIAA1211	4.27019	3.228	2.69216	0.100843	0.614077
HGLibA_24886	GCTGGTCTCTCGAGAATTGA	KIF1B	4.26847	0.0692263	1.93815	0.163869	0.798246
HGLibA_12610	CCTCATGATGTTACATCGCT	DDI1	4.26798	2.04918	2.11307	0.146046	0.747058
HGLibB_27647	GTTGTCCGTCCACGTCATCG	LY9	4.26631	3.63471	2.97602	0.084507	0.57026
HGLibB_22297	TGGTTGTAACTTGGTATTCC	HSPBAP1	4.26558	2.18942	2.15049	0.142525	0.736379
HGLibA_07252	CTCGCCGTTCGCGTCGCCGA	CARM1	4.26485	1.09198	1.95073	0.162508	0.794962
HGLibA_02345	AAACCTACCAGTGTTGTAGT	AP4E1	4.26379	0.386384	1.92875	0.164895	0.800846
HGLibB_04391	GTACAGCTCCCTGAGCACCG	BEAN1	4.26316	1.72082	2.03098	0.154121	0.770958
HGLibB_04787	GGTCAGACCATGAGCGAGAG	BRD9	4.25588	0.979086	1.93846	0.163836	0.798246
HGLibA_19913	GAAGCTGGGACCTCCGAATA	GPR142	4.2469	0.854799	1.92775	0.165005	0.801251
HGLibA_39809	CATTTGATGATTTGCCGAAA	RAB12	4.24277	1.79229	2.0278	0.154444	0.771673
HGLibA_63708	AGCACTGACCTGGAGTGGGA	hsa-mir-6881	4.23822	1.31823	1.95064	0.162518	0.794962
HGLibB_12826	TAAAGAAGAAAATGGCGAAG	DEFB108B	4.23716	0.863104	1.92098	0.165748	0.803449
HGLibB_00942	TTGCGAAGGCGCATGTACTC	ADD2	4.23158	1.03916	1.92231	0.165602	0.803077
HGLibA_40014	TCTACCACAATGTGGCCGAA	RABGEF1	4.2276	1.79853	2.01851	0.155391	0.774549
HGLibB_22842	AGGGCTGCTCTCCCAGAGCC	IGLON5	4.2268	1.59904	1.98201	0.159179	0.784848
HGLibA_03016	AGTTACCTTCTGGAGCGAGC	ARMC3	4.215	0.211327	1.90629	0.167375	0.808397
HGLibA_55758	GCTACTCTAGCTCAAGAGAC	ZNF292	4.21446	0.943652	1.90766	0.167224	0.808071
HGLibA_26360	ATCACAGGCAGCATCGCCGA	LGALS2	4.21164	2.053	2.07137	0.150087	0.75918
HGLibA_27580	ACGCAGTTCTCGGACGCCGA	LTB	4.21035	2.63652	2.28808	0.130371	0.700341
HGLibB_04976	CGTTGGTACCTGCGTGTTTC	BTNL8	4.20716	1.93923	2.03853	0.153358	0.768491
HGLibA_62644	AGAAGGTGAGACCAATGTCC	hsa-mir-6124	4.20649	2.15228	2.09008	0.148258	0.753909
HGLibB_07620	GCAACTAGTTCCTGAATATA	CCDC144NL	4.20235	0.38593	1.88572	0.169685	0.814826
HGLibA_60729	CCATCCCCGGTGTGCCCTTG	hsa-mir-4655	4.20159	1.18374	1.91155	0.166791	0.806701
HGLibB_02181	TTCTTCATTGATGAGAAAGC	ANO5	4.20127	1.26872	1.92123	0.165722	0.803384
HGLibB_00580	TGGGCAGAATCACGGCCAAA	ACSM4	4.2001	3.28323	2.6589	0.102972	0.619753
HGLibB_56837	CTTGCTCCAGATAAGTAATC	ZNF91	4.19788	0.432725	1.88834	0.169389	0.81442
HGLibB_20353	TGGTTCTTCAAATTGCACAT	GRSF1	4.19702	2.18799	2.09552	0.147731	0.752109
HGLibA_50055	AGTAGCTAAAATCCGTAAAA	TMEM170A	4.192	1.11053	1.89869	0.168225	0.810959
HGLibB_40858	TTTCCTCATCTGTTAGTGTA	RFC3	4.19007	1.21106	1.90733	0.16726	0.808167
HGLibA_47302	AGGGCGAGCAGTGCGCCCCC	ST8SIA6	4.18756	-0.342432	1.89	0.169202	0.813893
HGLibA_03776	GTGAACAAGAAACAAACGCA	ATP8A1	4.18041	0.304985	1.87208	0.171237	0.818178
HGLibA_06346	CACTGCAGTTGAGTGAGCAC	C4orf6	4.17714	2.26304	2.1065	0.146674	0.748988
HGLibA_14660	CCACACAACAACACCACGAT	EHBP1	4.17693	2.48905	2.19038	0.138875	0.725102
HGLibA_58101	CGGGCAGCACCAGAACTGGT	hsa-mir-196b	4.17601	3.83079	3.01335	0.0825814	0.56456
HGLibB_46635	AATATTAAAATCATTCGAAA	SPINK2	4.17171	0.313797	1.86252	0.172335	0.821097
HGLibA_26555	ACTGTGCCTGCGCTGCAGTT	LIMS3L	4.17164	1.10661	1.88266	0.170032	0.815496
HGLibB_47722	CATGGCCGACGAAAAGCCCA	SUMO2	4.17086	2.17874	2.07105	0.150118	0.759204
HGLibB_57692	ATGCCTTAGACTTAACCTCG	NonTargetingControlGuideForHuman_0664	4.16887	0.0164511	1.86784	0.171723	0.819564
HGLibB_54496	GCTTGATTTCAGCCAAAAAC	XPO1	4.16646	0.996573	1.87621	0.170765	0.817353
HGLibA_39540	GCGTCTACGTGCGCGTTAAT	PTPRU	4.16343	0.365704	1.92336	0.165487	0.802825
HGLibB_42583	GAAACAAGAAAACATCAAAG	SAFB	4.16231	2.06896	2.03403	0.153812	0.769908
HGLibB_10691	CTATCTCCACGACCAGAACC	COPE	4.1592	-0.221486	1.86636	0.171893	0.819955
HGLibA_35521	GTAGACATTCTGGCGGTAGT	PCDHGA10	4.15402	-2.19002	1.93337	0.16439	0.799607
HGLibB_54654	ACGAATGATGCCAAACTTTC	YRDC	4.154	1.14028	1.87618	0.170769	0.817353
HGLibB_21908	TGCGGGGGCACTAGAGCGCG	HOXB4	4.15189	-0.394691	1.86712	0.171805	0.819699
HGLibA_26162	TGCCAGCGTAGTCAGTAGCG	LCMT2	4.14973	3.05474	2.46328	0.116535	0.65828
HGLibB_35877	AGGAGAATGTGTGTGTGTCC	PDP1	4.14952	1.43394	1.89794	0.168309	0.811235
HGLibA_13012	ACGTGCAGCAGTGTCGCATA	DET1	4.14866	2.26564	2.08428	0.148823	0.755546
HGLibB_41884	AGATCTACAGACAGTCAATG	RPL31	4.14866	1.84876	1.97032	0.160413	0.788725
HGLibA_47938	GAGACTAGAAATGTATACCA	SYCP3	4.14248	2.10348	2.02727	0.154498	0.771879
HGLibB_36847	GATGGCGCTCCTCCCTGTGA	PLA2G2F	4.13644	0.905791	1.84882	0.17392	0.825385
HGLibB_56866	AAAAAGCATCTCTAGAAATA	ZNHIT6	4.13495	0.22292	1.85665	0.173012	0.822971
HGLibB_05975	TCACTGGGCGCAGTGCGGAC	C2	4.13433	0.163965	1.84184	0.174736	0.828318
HGLibA_15138	CAAAGAAGATCCGCAAGCAG	ENKUR	4.13183	1.6504	1.91948	0.165914	0.803803
HGLibA_11557	GAACAGAATACAACTCAAGC	CTAG1A	4.13072	2.56867	2.18645	0.13923	0.726229
HGLibA_63578	GGGTACAAAGGGCCAAAGAG	hsa-mir-6851	4.12959	0.441112	1.83669	0.17534	0.830175
HGLibA_64121	GGGCTCCTGCAGCGGCCACA	hsa-mir-8071-1	4.12951	2.01642	1.99598	0.157717	0.78053
HGLibA_50420	AGACGTGGTAGGCAGCGTAG	TMEM5	4.12818	1.57434	1.90378	0.167656	0.809174
HGLibA_33525	GTACATATTTATAAACGCAA	OR10J3	4.12519	1.80567	1.94171	0.163483	0.7974
HGLibA_60704	GAGCCTTGGAAGGTAGAAAG	hsa-mir-4650-1	4.12375	0.278011	1.83434	0.175616	0.83094
HGLibB_35123	CTACCTTCATGCCCGAGCGC	PAQR7	4.1228	4.7124	3.37355	0.0662511	0.519892
HGLibB_35652	GAGAAGTCCCGAGAATTCAT	PCYT1A	4.11994	1.50994	1.88764	0.169468	0.814497
HGLibA_61136	CATGTTCAATCTAAACCCCA	hsa-mir-4760	4.11947	0.968221	1.84023	0.174925	0.828985
HGLibB_07385	GGAGGATGCATTAGCACAAC	CBFB	4.11613	-2.02935	1.88464	0.169808	0.815069
HGLibA_38488	ATTACTTACCTGGGGCGGAG	PRIMA1	4.11281	1.88295	1.9515	0.162425	0.794783
HGLibA_36044	GTGCTTACCAGTGCGAGCGC	PEMT	4.11016	0.861877	1.82965	0.176169	0.83248
HGLibA_19233	TATGATAGTCCCAGCGAGCC	GLCE	4.10203	1.7411	1.913	0.166631	0.806249
HGLibA_15626	TTGTATCCCTACATCGTTAG	ETFDH	4.10054	2.96121	2.36411	0.124154	0.681839
HGLibA_60575	TGTCTTCATTGGACTGCTGA	hsa-mir-4529	4.10019	0.0848343	1.82167	0.177114	0.835491
HGLibB_45853	AAAGATATTTCTTAGGCTTC	SNCA	4.0962	2.34733	2.07123	0.1501	0.75918
HGLibB_37428	TTTAAACACCTCTTCCTGTG	POGLUT1	4.09496	0.172346	1.80951	0.178567	0.838463
HGLibB_21022	TTCTGTGCGGTGAGCAGACG	HDHD1	4.09453	0.722394	1.81554	0.177844	0.836916
HGLibB_51762	CTTGGGCCCCCTGCGCCCAA	TSC22D4	4.09369	2.8566	2.29984	0.129387	0.698171
HGLibA_27703	CTCGCAAACGGCCGGTGCAC	LYL1	4.09336	1.2588	1.83921	0.175043	0.829364
HGLibB_56913	TGATAGGCAAAGATTACATG	ZRSR2	4.07757	1.02447	1.80969	0.178546	0.838463
HGLibB_21868	GTTCTGCGCGAAAGAGCACG	HOXA10	4.07607	1.84051	1.9131	0.166619	0.806249
HGLibA_61268	TACCATTCATGTTCACTGAA	hsa-mir-4790	4.07501	2.78449	2.24506	0.134042	0.710657
HGLibB_37891	TTACCCGTGAATTTCAAGTC	PPIL1	4.07491	-0.505918	1.81331	0.178112	0.83733
HGLibA_51060	TGAGGAGGGCACCGCCGTAG	TP53I11	4.07278	2.23198	2.01135	0.156127	0.776478
HGLibA_30092	ATGCAGACGCTCCGATTTCT	MRPS33	4.06878	2.46273	2.09049	0.148219	0.753833
HGLibA_22189	TGGGAAAGCGTACTCGTTCG	HSD17B3	4.06869	3.15428	2.44689	0.117758	0.662294
HGLibA_13816	AACTGTCGTAAGTCCACAAC	DPCR1	4.06764	0.72646	1.7993	0.179797	0.841707
HGLibA_61521	AGTGGCGGCGACTGTGGCGA	hsa-mir-5091	4.06318	0.597178	1.79318	0.18054	0.843817
HGLibA_63231	GTGGGGTTGAAATCGCAGAC	hsa-mir-6767	4.05758	0.512816	1.78402	0.181656	0.846629
HGLibB_04688	GAGCTCCCCCTCAGTCTGAG	BOLA3	4.05564	2.94001	2.31063	0.128492	0.695221
HGLibA_56469	GCAGGGACGAGCAATATCGA	ZNF655	4.05301	2.36473	2.0426	0.152948	0.767387
HGLibB_41053	TTTGCATTGTTCTCTTGCAG	RGS7	4.04901	2.05687	1.94348	0.163292	0.797015
HGLibB_56256	GGTTTCTCTGAGAAAGGTCC	ZNF585B	4.04734	-0.181171	1.789	0.181048	0.845367
HGLibB_10967	TTACTTCTTTGACGAACCAT	CPO	4.04287	1.96114	1.91641	0.166253	0.80505
HGLibA_61378	ATCTTCGATACTCGAAGGAG	hsa-mir-494	4.04284	1.91928	1.90579	0.167432	0.808418
HGLibB_02387	TGATCTTGACAAAGAAGAAA	APC	4.04076	0.738464	1.77754	0.182452	0.848571
HGLibB_20259	AGGAGGAATCTTCGAGTATG	GRIK3	4.04017	1.75105	1.86747	0.171766	0.81964
HGLibA_37408	GATGTCACTCTCGCCCGAGA	PNPLA2	4.03909	6.06387	3.30976	0.0688696	0.526734
HGLibA_30033	CTGTCGAGCGCCTGTGCAGA	MRPS11	4.03854	1.73821	1.86417	0.172144	0.820564
HGLibB_07333	CACTTGCAACACCGTTTCTA	CASR	4.03608	0.847113	1.7768	0.182543	0.848632
HGLibA_61064	AATGAACTCCCTGCAGGCAA	hsa-mir-4742	4.0345	2.53271	2.08882	0.148381	0.754044
HGLibB_56441	ATGAGTTCTCCAATGTTTAG	ZNF674	4.03313	3.26435	2.47961	0.115331	0.655011
HGLibA_60895	GAAAAACACTGAAGACCAAG	hsa-mir-4697	4.03181	0.486193	1.76617	0.183856	0.852421
HGLibB_06012	ATTCCCAAGAACCCTCGTAA	C20orf24	4.03178	-0.00108813	1.77172	0.18317	0.850569
HGLibA_56200	GGGACAAGGAATTGGTTCAC	ZNF546	4.03089	2.61039	2.12085	0.145306	0.74468
HGLibB_25813	ACAGCAGGGTGTGCTGCAGC	KRTAP9-8	4.03023	0.784996	1.77077	0.183287	0.850864
HGLibB_04004	TTACTCTATGCGCAGCGCGA	B3GNT9	4.02975	-1.33195	1.80905	0.178622	0.838661
HGLibB_15469	AGAACGAGAAGCAGAAGAAA	ERLEC1	4.02741	1.3705	1.8029	0.179362	0.840349
HGLibB_33812	TACCACTGTCCCAAAACTCC	OR2T11	4.02655	2.6049	2.11476	0.145885	0.746556
HGLibA_47480	GAAAATCATCAGCGTTGAAA	STK31	4.02625	1.69534	1.84897	0.173903	0.825378
HGLibB_13210	CTCTCCGCTACCCCATCGAG	DIDO1	4.02555	2.21496	1.96841	0.160617	0.789439
HGLibB_41941	TATCAATGGAGTGAGCCCAA	RPL7	4.0216	1.43274	1.80209	0.179459	0.840766
HGLibB_42245	AGCGTGAGCATCGTGAGCAA	RSAD2	4.02134	4.4511	3.16728	0.0751276	0.54461
HGLibB_54440	CCAATTCTTCTAGTTAGTGA	XIAP	4.02005	1.52734	1.81852	0.17749	0.83612
HGLibA_51798	TATCCGGCTGGTCGGGGAGC	TRPV6	4.01469	1.66419	1.83469	0.175575	0.830899
HGLibA_44022	CAAGGGCCGCAAGAACTCGG	SHE	4.01395	2.02119	1.90774	0.167214	0.808071
HGLibB_16645	GCAGGGCTTCCTGTATGATC	FAM65A	4.01224	0.314035	1.7486	0.186053	0.8583
HGLibB_00715	TTACCTGCCATAGTATAAGA	ADA	4.01121	2.806	2.19938	0.138066	0.722703
HGLibB_37524	TCCTCTACGTCGCCAGCCCG	POLR2D	4.01113	3.52632	2.62187	0.1054	0.626448
HGLibA_34002	AATTAACAAGAAATGCCAGT	OR4F29	4.00125	-1.64685	1.78153	0.181962	0.847433
HGLibB_54560	AGTGCATGATGTGCGATGTG	YAF2	4.0004	0.122879	1.74456	0.186562	0.859632
HGLibA_22106	AGCTGCACCAGCGCACCATG	HRK	3.99822	2.18522	1.93705	0.163989	0.798424
HGLibB_30983	GAACCCAACCCAGATTATCG	NABP1	3.99628	2.09222	1.90994	0.16697	0.807247
HGLibB_36105	ATGGTGGGTTTACCAGCTCG	PFKFB1	3.99452	-0.173297	1.74868	0.186043	0.8583
HGLibB_05804	TACCCATGTGCCTGCTGAGC	C1orf186	3.99195	2.69611	2.12735	0.144691	0.742855
HGLibB_15062	ACTCACCCCAGAAGAGGAGC	EMR1	3.98906	0.83065	1.74527	0.186473	0.85937
HGLibB_40152	TCCAGTCCTGAAGGCGGAGA	RANBP3	3.98894	1.98029	1.87933	0.170411	0.81609
HGLibA_20277	AGGGCGCGCAGCGACTGCGC	GRID2IP	3.98855	3.74736	2.74348	0.0976516	0.605365
HGLibA_20638	GCTCAGTTTGTAGCTCTCGC	GUCA1B	3.9883	2.35705	1.98723	0.158631	0.783192
HGLibB_26150	GAAGAAACCTGCGAAAAGTA	LCN9	3.98623	2.68143	2.11504	0.145858	0.746515
HGLibA_56217	CTGAACGGGGAACCTTAGCG	ZNF552	3.98378	1.24381	1.76001	0.184623	0.8545
HGLibA_62556	GGAGCATGACAGAGGAGAGG	hsa-mir-6076	3.98341	0.0652733	1.73267	0.18807	0.863059
HGLibA_51380	TAAGCATCCGTATGCTGCTA	TRHDE	3.97072	2.13626	1.90033	0.168041	0.810427
HGLibB_56464	GCTAGAGAACTACAGAAACC	ZNF682	3.97034	-0.728572	1.74895	0.186009	0.858291
HGLibA_45693	CACTGCATACCAGAAACAAC	SMEK1	3.96869	1.85054	1.83413	0.17564	0.830982
HGLibB_04225	GAACTGTAGGCAAGAGGACC	BBS9	3.96748	2.11135	1.89211	0.168964	0.81332
HGLibB_11041	AACCTACTGGACCCGTGAGC	CRABP1	3.96486	-0.103318	1.72387	0.189196	0.86551
HGLibA_02671	CCTCGCAAGCTTTGCGCAGC	ARFGEF1	3.96381	1.20014	1.74097	0.187016	0.860815
HGLibB_54829	CGCGCAGACAGTGCGACAGC	ZBTB45	3.96167	1.8006	1.81888	0.177447	0.836019
HGLibB_02136	CCCCGGTGGGCGCGGTGGAC	ANKRD65	3.96141	1.62583	1.7889	0.18106	0.845367
HGLibB_41922	CATCTGAATCCACTGGGGGA	RPL39L	3.96058	1.78576	1.81339	0.178102	0.83733
HGLibA_53795	CTTTATTTAGTGGACATATC	VPS45	3.96054	1.1543	1.73492	0.187783	0.862334
HGLibA_47152	GTCCTGAGGATAACGGAATG	SSR1	3.95977	1.92835	1.84459	0.174414	0.827213
HGLibB_46611	AGGAGAAGTTGTGGACAGCC	SPIN1	3.95969	2.92305	2.21376	0.136785	0.719001
HGLibA_15718	ACCTCCGATACCTAGCCATG	EXD2	3.95946	0.739068	1.72084	0.189585	0.866499
HGLibB_43277	GCCGAGTACAGCTCTAAAAA	SEMA3E	3.95901	0.983324	1.72486	0.189069	0.86541
HGLibA_07451	AGACTTGGTGCTGGCGAAAG	CBX3	3.9573	2.45842	1.99642	0.157672	0.780485
HGLibA_20857	ATACAGTGAGGTCATAGCGA	HARS	3.95604	1.62586	1.78517	0.181515	0.846423
HGLibA_54704	AGTGTGTACTATGTCGTCGA	YOD1	3.95556	3.76542	2.7182	0.0992097	0.609845
HGLibB_35165	GGTGCGCCTGTCCAAGAAGA	PARP1	3.95085	0.468886	1.70742	0.19132	0.871243
HGLibA_29827	CATCGTCGAGCTGGCGGAAC	MRFAP1	3.9508	1.12172	1.72501	0.18905	0.865408
HGLibB_07631	TGCAGTACCTGGTGTGTAAG	CCDC149	3.94854	2.29044	1.9335	0.164376	0.799607
HGLibA_19360	CTAGCAAAAAAGGGCTTTAT	GLUD1	3.94614	1.2676	1.73434	0.187857	0.862429
HGLibA_00343	CAAGCTTGGATCAGATATCA	ACAA2	3.94442	2.32093	1.93934	0.16374	0.79821
HGLibA_33108	CCATGGCCTAGCGTTCCCTG	NUTM2F	3.94369	1.54644	1.76356	0.184181	0.853258
HGLibB_37691	CTGACAGGCCGTACAATGCC	POTEI	3.94311	1.19018	1.72513	0.189034	0.86538
HGLibA_62745	TTTTAAAGGCTTCTTTTGGT	hsa-mir-626	3.94118	2.05467	1.85945	0.172688	0.821868
HGLibA_34618	AGGTGGTGTTATAGATGCAC	ORM1	3.94063	1.25	1.72862	0.188587	0.864353
HGLibA_57361	CTGGAATGCTCGGAATAAGA	hsa-mir-1244-1	3.93957	5.79461	3.18361	0.0743802	0.542362
HGLibA_07170	GGGCTTCACACACGAGAACA	CAPN5	3.93546	1.06745	1.70957	0.191041	0.870505
HGLibA_25111	GGGACGACAGTCCAAGTACG	KLHDC8A	3.9326	-0.444855	1.71115	0.190836	0.869994
HGLibB_08906	CCCTATTGCAGCAGATCAGC	CDY2B	3.93166	0.250989	1.69237	0.193289	0.877227
HGLibA_02845	CTTCTAGGCCTAAACGGCAG	ARHGEF3	3.92576	2.35879	1.93742	0.163949	0.798351
HGLibB_03981	TAACCACCGACGTGACCCTC	B3GNT2	3.92539	1.90592	1.81375	0.178059	0.83733
HGLibB_54941	TACTCAGCTCACCGCCTAAA	ZCCHC12	3.92487	2.41445	1.95554	0.161991	0.793639
HGLibA_61547	GTGATTGAAACCTCTAAGAG	hsa-mir-510	3.92458	1.5525	1.75053	0.18581	0.857796
HGLibB_23663	TGGAGAGATCTCTAAAAAAG	ISY1-RAB43	3.91853	-1.36546	1.71491	0.19035	0.868691
HGLibA_35054	ACTACACGACCGAAAAGTAC	PAK7	3.91354	2.73955	2.08022	0.149219	0.756419
HGLibB_20052	GGTTGATGGCTGATACGAGC	GPR75	3.91326	1.60901	1.75094	0.185759	0.857691
HGLibB_41918	GTTGCAGCCTCGGAAAATTG	RPL38	3.91076	1.66594	1.75812	0.18486	0.854998
HGLibB_09298	GGGCATCCAAGGAGCCGCTT	CGB2	3.90952	0.589712	1.68174	0.194693	0.881077
HGLibB_24758	AGTTACTCCCGGACGGCCTG	KIAA1614	3.90701	-0.49193	1.69132	0.193428	0.877595
HGLibA_16950	GAGTAGGGCCCTCGATACAC	FBLN5	3.90418	1.94836	1.80704	0.178863	0.839165
HGLibA_52273	TGAGGAACACGGGATCGACT	TUBB1	3.90315	3.83171	2.7034	0.100134	0.612061
HGLibB_02641	ATGTGAACTCTTAGTCCCAC	AREL1	3.90241	0.821412	1.68333	0.194483	0.880345
HGLibB_13179	CCAATGCCAACCAGCGGTCA	DHX38	3.89936	2.49206	1.96058	0.161452	0.792049
HGLibA_07686	GAAATACTATGCACTTAAAC	CCDC169-SOHLH2	3.89551	-0.221571	1.6782	0.195163	0.882538
HGLibA_50132	AGTACGTGTGCGACCACTTG	TMEM189	3.89488	0.788876	1.67475	0.195624	0.884001
HGLibB_16428	GAGGGACCCGGCGGAAGTCC	FAM20C	3.8885	2.20773	1.85786	0.172872	0.822466
HGLibB_33818	AGACAGAGATGACAGATAGA	OR2T2	3.88843	1.18467	1.68654	0.194057	0.879283
HGLibA_05450	GCCATCCCCGGCACTAATAG	C16orf46	3.88601	0.479768	1.66251	0.197265	0.888074
HGLibB_40319	ACTGCGAGCGCTACCTGAAC	RASL12	3.88597	3.12124	2.24994	0.13362	0.709511
HGLibA_15837	GGCCAAAGTACCACACTTCC	EZR	3.88482	5.08503	3.09368	0.0785967	0.55313
HGLibA_19434	AGTGTAGACAAAGTAGCTGA	GMPS	3.88339	0.133112	1.66038	0.197552	0.888704
HGLibB_17131	AGGAGAACTCAAATCTCCTA	FBXW7	3.88311	1.03767	1.67156	0.19605	0.88513
HGLibB_56022	GAGTCTTGATGCTTTGTCCA	ZNF490	3.88303	4.34257	2.95802	0.0854528	0.57257
HGLibA_12063	ATCGTCTCAGAAGTGTAACG	CYP19A1	3.88195	3.18717	2.28197	0.130885	0.701922
HGLibA_17771	ATGCAGCCAATTATACAGTG	FNTA	3.87824	-0.16801	1.66979	0.196286	0.885744
HGLibB_04879	CTTTAAAGTGGCGCTGGACA	BST1	3.87783	1.66145	1.73361	0.187951	0.862697
HGLibB_49304	CTAGAATACCTCTGAAAGCT	THOC1	3.87665	2.81628	2.08526	0.148727	0.755227
HGLibA_43699	AAGATCGCCAAGACTCACGA	SF3B1	3.87548	0.3034	1.6536	0.198469	0.890645
HGLibA_46673	CATGAAGACCCCCAACGCAC	SPIN2B	3.87514	1.20518	1.67892	0.195068	0.882334
HGLibB_57969	CTAAAATTTTTGCGTGTTTG	NonTargetingControlGuideForHuman_0941	3.87345	0.685505	1.65789	0.197889	0.889172
HGLibA_23267	GGAGACGCAGAACCGCGCGT	INA	3.87109	1.55103	1.71256	0.190654	0.869331
HGLibB_37527	ACTTGGGGGCCATGTCGACC	POLR2E	3.87057	2.30331	1.87467	0.170941	0.817632
HGLibA_63253	CGTGCAAGCTGTGCCTTCTC	hsa-mir-6770-3	3.86945	1.73854	1.73948	0.187205	0.861261
HGLibA_01522	GTGGTTAGTGTGAAAACCGA	ALAS1	3.86745	2.2413	1.85223	0.173525	0.824215
HGLibA_52765	CTGTGAATGCTACGATGAGC	UBTD1	3.86518	2.04447	1.7986	0.179882	0.841919
HGLibB_32547	TCTTCAATTGTGTAGCGAAG	NR1I3	3.86514	2.76834	2.05205	0.152002	0.764279
HGLibA_45215	ACGCCGCCGCAAGACACCCC	SLC4A2	3.85842	2.1259	1.81108	0.178379	0.838035
HGLibA_14549	TTCGACCGCAGGAGCTAAGA	EFCAB6	3.85774	3.00943	2.16539	0.141149	0.732029
HGLibA_39879	CTACCGCAACGTACATGCCG	RAB33A	3.85517	3.48179	2.42983	0.119046	0.666054
HGLibA_31246	ACCTGGGACCTGTTGCCTCT	NBPF9	3.85285	2.95771	2.13465	0.144003	0.740763
HGLibA_11654	AGCTCCCGGGAAGAGTCCGG	CTNNBIP1	3.85263	-0.480571	1.65155	0.198748	0.891286
HGLibB_26488	GCCCAAAGCCGAAGTGCAAG	LIMA1	3.85106	-0.0196139	1.64211	0.200036	0.894555
HGLibB_48106	CAGGATTCTAAGTCCTAGCA	TACC3	3.84877	2.00759	1.77809	0.182385	0.848571
HGLibA_07903	ACTAGTCCCAACGTCTACCG	CCDC87	3.84788	0.943276	1.64531	0.199598	0.893417
HGLibB_20010	CGCCGGGACGCGAAGAGCAA	GPR39	3.84503	2.67229	1.99072	0.158266	0.78212
HGLibA_11560	TCCGGAGCCATGCAGGCCGA	CTAG1B	3.84483	3.10716	2.2002	0.137993	0.722381
HGLibA_01329	TGAATTCACAGAAGAACAAA	AIDA	3.84179	0.664465	1.63507	0.201004	0.897165
HGLibB_06134	GGGGAGACAGCACGCCAGTG	C2orf48	3.83674	2.4206	1.88595	0.169659	0.814819
HGLibB_26971	ACCTGAGGAGTTCAGATCGT	LOH12CR1	3.83605	1.11329	1.64313	0.199896	0.894277
HGLibA_31528	TTCCCCGAACGCAAGGAGCG	NDUFB7	3.83356	-0.700557	1.64374	0.199813	0.89405
HGLibA_13466	GATCACTCAACACAACGTGA	DNAAF3	3.83205	2.58634	1.94278	0.163367	0.797215
HGLibA_01458	CACATGATCAGATTATGCGA	AKIRIN1	3.83144	1.3533	1.65864	0.197788	0.889002
HGLibB_20001	CTGGCCCCCAGCGATCAAGC	GPR35	3.83007	5.24143	3.03314	0.0815802	0.561743
HGLibB_20778	GAAGTTTGCAGAAAACCTTA	HADH	3.82957	-2.25017	1.6944	0.193022	0.876311
HGLibB_33357	ACACCTTGAGAAGAACTTGA	OOEP	3.82943	2.84764	2.05844	0.151365	0.762305
HGLibA_40095	AGAATACATAAGTAGCCGCA	RAD52	3.8288	0.96186	1.6322	0.2014	0.898234
HGLibA_12808	CATGACAGTGCAGGTCCCAT	DEFA6	3.82789	1.24209	1.64732	0.199324	0.892748
HGLibB_55578	AAGACAGCAACTCAAAGAAA	ZNF234	3.8277	1.22352	1.64639	0.199451	0.89309
HGLibA_49246	TAGTCGATGCAGCAGTACAA	TGIF2LX	3.82269	1.79511	1.71305	0.190591	0.869225
HGLibB_40021	CAAGATAGACATTGACCCCG	RAD23B	3.82073	1.08963	1.63137	0.201514	0.898616
HGLibB_47630	TTCATCTGCTATGAAAAGCA	STYX	3.81773	1.72888	1.69966	0.192333	0.874258
HGLibA_39717	TGAGTGAGTGATGTGCTCGA	QARS	3.81415	1.51375	1.66531	0.196888	0.887111
HGLibA_46880	CCCAGTCGTCGACATCCCAG	SPTBN1	3.81137	2.42249	1.86594	0.171941	0.819993
HGLibA_06489	GGCTGCTTCCGAACCAAGCA	C6orf47	3.80939	1.61764	1.67691	0.195335	0.883118
HGLibB_40905	TTGTACCTGTGTGATGGAGA	RFWD2	3.80862	0.805239	1.61566	0.203697	0.904441
HGLibB_37014	TCTGATAACCTAAGTCGCCA	PLEKHA1	3.80723	2.73381	1.98526	0.158838	0.783821
HGLibB_25423	TCAGTATGAAACCCTGAGTG	KRT25	3.80526	1.62024	1.67449	0.195658	0.884051
HGLibA_19153	GAGCCGCTATTTAAGTGCCA	GJA9	3.80476	2.5056	1.88748	0.169487	0.814497
HGLibA_59467	CAGCCCCATGCAGTGAGTCG	hsa-mir-378j	3.80415	1.17445	1.62502	0.202393	0.900915
HGLibB_51714	GAAATAGCTGTGTTCATCGA	TRPT1	3.80296	1.58347	1.6673	0.196621	0.886489
HGLibA_09465	ACGATCACATCAAACTCCGA	CHM	3.80239	2.06257	1.7545	0.185313	0.856275
HGLibA_39220	GGTTGAGGAGGATCCGTTCT	PSORS1C2	3.8011	2.21677	1.79269	0.180599	0.843997
HGLibB_20783	GGAAGTGAAAACAAGCAATG	HADHB	3.7991	1.61048	1.66926	0.196358	0.885865
HGLibB_39513	GCCTCTCATGATCCTTGACG	PTTG1	3.79844	1.63884	1.67284	0.195879	0.88472
HGLibB_27558	CCCGACACGATGCCGAGGCC	LTBP4	3.79717	1.93521	1.72386	0.189197	0.86551
HGLibA_24769	CATACCGAGCTGTTAGAGAG	KIAA1468	3.79714	2.86809	2.0391	0.153301	0.76833
HGLibA_63691	TGTTGGGAGTTCAGGGCCGA	hsa-mir-6877	3.79641	1.61845	1.66774	0.196562	0.886367
HGLibB_19745	CTGCACGCCCTCGCTGCGGG	GPC5	3.79109	0.486994	1.5956	0.206528	0.911811
HGLibB_18724	GGTAAGGCGGCCGGCGAAAG	GBX1	3.79072	0.507576	1.59656	0.206391	0.911386
HGLibA_09282	GGGCAGTGCCGTCATCTCCC	CFL1	3.78979	2.91982	2.05854	0.151355	0.762305
HGLibB_14140	GAACTTCAGAATTCCCGGAG	DUSP22	3.78976	0.956225	1.60437	0.205285	0.90893
HGLibB_41056	TAGATAGTCAGCAACATTCC	RGS7BP	3.78839	0.507731	1.59476	0.206647	0.912137
HGLibA_49058	CGGGTTCCGGCATAGCAACG	TEX13A	3.78703	3.18047	2.18967	0.138939	0.725212
HGLibA_41729	TTCCCTCTAGGATCACATCA	RNPS1	3.77639	1.19768	1.60875	0.204667	0.907187
HGLibB_16425	GCTGTCTTTGATTACCTGAT	FAM20B	3.776	1.29175	1.61531	0.203747	0.904492
HGLibB_26391	ATGCTCTCCACCAATATGAC	LHFPL1	3.77583	4.07321	2.69746	0.100508	0.613116
HGLibA_06521	CCTAAATTCATAGTAGCAAA	C7orf10	3.7754	1.61713	1.65219	0.198661	0.891156
HGLibB_14829	CACACTCCAAACCATGAAGA	EIF5	3.77418	0.715997	1.58848	0.207543	0.914486
HGLibB_53632	TATGAGTATCACTCATGATG	VN1R1	3.77397	0.484384	1.58644	0.207836	0.915156
HGLibB_39174	GACCCCTCGTCCAGTCATTG	PSPC1	3.77303	0.149117	1.58406	0.208177	0.915831
HGLibB_39216	TAATTCCAAAAAAGAAAACT	PTCD3	3.77168	2.04103	1.72674	0.188828	0.864957
HGLibA_06067	CGTGTGTGTGCGAACGACCA	C22orf29	3.77163	3.64169	2.43805	0.118424	0.664563
HGLibB_54529	CTTTGCAGCAAGAGATGATG	XRCC5	3.77125	1.43793	1.62348	0.202607	0.901507
HGLibB_06722	GCAAAGGATTCCTCCAGTAC	C9orf40	3.77055	1.83918	1.68397	0.194398	0.880093
HGLibA_54516	CCGTTGTCTCGGCCACGAAC	XK	3.76848	0.37468	1.57711	0.209178	0.91847
HGLibB_24740	GGTCTTCAAGTAGCTCTACA	KIAA1524	3.7675	1.59715	1.64398	0.19978	0.893966
HGLibB_54019	AAGAAGTCACAAGAAAATAA	WDR4	3.76574	1.35255	1.61177	0.204243	0.905999
HGLibA_09715	GGCACAATTTAATCCTGAAG	CINP	3.76521	2.86416	2.01007	0.156258	0.776776
HGLibB_17210	GTCCAGATTCCCGAACCTCG	FCRL4	3.76167	1.06379	1.58721	0.207725	0.914936
HGLibA_08777	GCCCAAACGGGTCATCGTCC	CDK5R1	3.76092	1.70237	1.65413	0.198398	0.890459
HGLibA_26295	CCTGTGCCCATCTTAATGAC	LENEP	3.7576	1.66616	1.64653	0.199432	0.893068
HGLibB_21196	TGATCATGAGAGTCGCCGTG	HFE	3.75665	3.22511	2.18593	0.139277	0.72635
HGLibA_38862	CCGGCTCAGCCTGTCCGAAA	PRRC2B	3.75587	1.75331	1.65757	0.197932	0.889294
HGLibB_08439	CGATGGCAGAACGAGAAGCT	CD79A	3.74783	3.07907	2.09951	0.147346	0.75084
HGLibA_62848	AGGCCCAGTGCTGGGGTCTC	hsa-mir-650	3.74734	2.43175	1.81734	0.17763	0.836391
HGLibB_53863	GATGCCACTCCCACAGCCGA	VWCE	3.74423	0.254239	1.56318	0.2112	0.923045
HGLibB_56238	GCGTGGCGCGATGCCGCGAC	ZNF580	3.74256	2.68936	1.91087	0.166867	0.806941
HGLibB_21777	ACTTCACGAAGGGGCAAAAG	HNRNPC	3.74052	0.289742	1.55744	0.21204	0.924856
HGLibB_47721	TGAAACAGACACACCTGCAC	SUMO2	3.73985	0.453325	1.55926	0.211774	0.92422
HGLibB_19227	GAGATGGATCGTAATGGTAA	GLI3	3.73863	2.94126	2.02328	0.154904	0.773181
HGLibB_44242	GAATGCAGCAATATTAAAAA	SKP1	3.73499	1.41195	1.5945	0.206684	0.912195
HGLibB_05646	GGACGCCCTGTATTACCGCG	C19orf35	3.73446	1.87332	1.6642	0.197037	0.887514
HGLibA_06657	GCGGCAGATATTCTTTCCAA	C8orf87	3.72626	1.23762	1.57619	0.209311	0.918897
HGLibB_05481	TGTCTGAGAAGTAAACCCGT	C16orf80	3.72395	1.40908	1.58651	0.207826	0.915147
HGLibB_38212	TAGGCCGATGCTTGCTTGCA	PRAC	3.72056	2.61463	1.86185	0.172411	0.821367
HGLibA_59012	GTTTCCACAGTGCATCACAG	hsa-mir-33a	3.71761	3.51823	2.31198	0.12838	0.694834
HGLibB_12692	CTGAACTCTGAAAAACAGAG	DDX3Y	3.71617	2.78708	1.93206	0.164533	0.799964
HGLibA_57848	ACATCAGCGAAACAGGCAAA	hsa-mir-1468	3.70812	2.90414	1.97857	0.159542	0.785805
HGLibB_21903	AGTCGGCCGCGAAGAAGTTG	HOXB2	3.70777	-1.05856	1.56608	0.210777	0.92174
HGLibA_44710	CAGGTCGATCTTGGAGAAAG	SLC25A33	3.7049	2.84194	1.94461	0.163168	0.796823
HGLibA_08910	GTCTTTCCTCATGGCTTCCC	CDY2A	3.70377	-0.105715	1.54076	0.214505	0.931428
HGLibA_08308	AGACGCCCCCGCGTACCAGC	CD247	3.70253	1.65995	1.60612	0.205039	0.908237
HGLibA_58505	GTAGGTGCCTGGAACATAGT	hsa-mir-3116-1	3.70242	1.43214	1.57435	0.209576	0.919556
HGLibB_38911	CCAGCTGCCCATGGTGTCCG	PRSS54	3.7015	2.53788	1.81519	0.177887	0.837049
HGLibB_51368	ATGTGATTGACGTCATGAAA	TRIM22	3.69823	2.77127	1.90903	0.167071	0.807702
HGLibA_12007	TTCCATCAATTCGAGCCGAG	CYB5R3	3.69693	2.28734	1.73323	0.187999	0.862853
HGLibA_52674	GTTGTCATCAGTTTGACCCG	UBE2Z	3.69681	0.389802	1.52988	0.216131	0.93525
HGLibB_08267	CAGGCTTGGGGAAGCGCTGA	CD1D	3.69551	0.687642	1.5358	0.215244	0.933206
HGLibB_10994	CCTCCGGGCAGAATCCCACG	CPSF4	3.69442	1.38925	1.5637	0.211124	0.922783
HGLibA_15785	GGGTGTGTACGGGCCGGCCG	EXOSC5	3.69353	1.30541	1.55751	0.21203	0.924847
HGLibB_45384	AGGAGGCTATGGTGTTGAGA	SLC9B2	3.69127	0.510017	1.52811	0.216397	0.935746
HGLibB_51597	AGGCCAGCTGAAAAAGAACA	TRMT10A	3.68981	1.56266	1.58325	0.208292	0.916119
HGLibB_14528	AAGAGAACTTGAAATCCAAG	EFCAB6	3.6887	1.586	1.58562	0.207954	0.915444
HGLibA_63193	TTTCCTGAGGGGAGAGGCAA	hsa-mir-6759	3.68679	2.66107	1.85251	0.173491	0.824153
HGLibB_03230	CTCCGCGTTCTTGCGCTCGC	ASB2	3.68634	0.929698	1.53184	0.215836	0.934705
HGLibB_55871	ACCTGGAGGTGGGCGTCGTC	ZNF414	3.68533	2.4232	1.76515	0.183984	0.852674
HGLibA_61270	CATTGAAATTCTCATTGATA	hsa-mir-4791	3.6841	0.393551	1.52047	0.217548	0.938331
HGLibB_44856	ACAGTAGTTATAATACTAGA	SLC30A4	3.68367	1.09526	1.53706	0.215056	0.932721
HGLibB_38195	AGGTGGCATTATAAGTCCAG	PPY	3.68332	0.547337	1.52327	0.217126	0.93755
HGLibA_36914	AGTTGGCCACTATCCTAGTC	PLA2G4F	3.68322	1.91912	1.6363	0.200834	0.896628
HGLibA_64640	GCTGATATATACGACAAGCC	NonTargetingControlGuideForHuman_0257	3.68183	-0.138751	1.52768	0.21646	0.935755
HGLibB_35962	AGGTGTCTTCCAAACCCCAC	PEAR1	3.6812	2.89536	1.95063	0.162519	0.794962
HGLibB_50888	CGGGAACCGGAACTACAGAG	TOM1L2	3.68104	2.2539	1.71076	0.190887	0.870116
HGLibA_10174	TTGTGCAGTGCTCGACTGTG	CLYBL	3.67898	2.3954	1.75179	0.185652	0.857356
HGLibA_43842	TGTCAGCTATATGCATTGAA	SGOL1	3.67752	0.518987	1.51851	0.217846	0.938992
HGLibB_03331	CAGGCCCCGCTCCACGATGG	ASNA1	3.67714	1.95196	1.63782	0.200625	0.89605
HGLibA_65208	CTTCCTGCGTGGCTTTAAAC	NonTargetingControlGuideForHuman_0825	3.67094	2.21	1.69023	0.19357	0.877816
HGLibB_13684	TGGGCTTTCTGAACGAGTCC	DNMT3B	3.66795	3.20985	2.09155	0.148115	0.75334
HGLibB_03286	GTCCGGAGCAGAGACGCTGC	ASGR1	3.66738	3.15162	2.06112	0.151099	0.761723
HGLibB_28366	GAGCTGAGCCTGCCACGCCG	MAST3	3.6665	2.41117	1.7472	0.186229	0.858633
HGLibB_53692	TGCAGCCCCTGGGAACAAGC	VPS28	3.66599	0.832159	1.51606	0.218217	0.939933
HGLibB_46958	AGTGTCTTGCTCTATTGCTC	SRP9	3.66395	0.856198	1.51622	0.218192	0.939918
HGLibA_25807	CGGGGACACAGCAGCTAGAC	KRTAP5-7	3.66311	1.26433	1.53313	0.215643	0.934195
HGLibA_20361	TACCAATCTCCCTCGAGATC	GRM8	3.66096	2.07646	1.65059	0.198879	0.891709
HGLibA_39718	GAGGCAGTGTGTGTAGTCGT	QARS	3.66019	-0.594001	1.51905	0.217764	0.938705
HGLibB_00531	AATGAAGCGCCCACACGAAA	ACR	3.65974	1.01987	1.51502	0.218375	0.940374
HGLibA_27542	CCCCGACGAGATCATCGACA	LSM4	3.6576	4.10387	2.57045	0.108877	0.637202
HGLibA_15282	AATGACAGCACTGACCGAAG	EPGN	3.65721	3.19609	2.07614	0.149618	0.757661
HGLibA_45561	GGGACCTCACCTGGATGGTC	SLX1B	3.6565	1.35926	1.53505	0.215356	0.933396
HGLibA_50889	GCCCCACAGTGAACAGGTGG	TNNT3	3.65641	0.116973	1.52041	0.217558	0.938331
HGLibB_23327	CGCTGACTGTGTATTCCATG	INPP5J	3.65328	2.75736	1.86491	0.172059	0.820266
HGLibA_10754	AACGGAGATACTCGCGACCG	COQ4	3.65282	1.38929	1.53495	0.215372	0.933396
HGLibA_59074	ATTCACTCAAACAAACAAGA	hsa-mir-3610	3.65118	1.49493	1.5458	0.213756	0.929407
HGLibA_57728	CGGGGTCTTGCTCTGTTGCC	hsa-mir-1303	3.65054	1.23047	1.5228	0.217196	0.93759
HGLibB_55695	CACCCAGATCTGTTGACCTG	ZNF296	3.65015	1.82124	1.59297	0.206903	0.912867
HGLibA_36717	ACTGCATCATCTGCTATTAA	PIP5K1B	3.6475	4.96861	2.78145	0.0953619	0.598295
HGLibB_32864	GCTTGGGGGAAGCCGAGCGA	NUBPL	3.64495	1.91852	1.60741	0.204856	0.907793
HGLibB_32806	TGGTGACAGCATGACGAGCG	NTMT1	3.64315	1.51427	1.54348	0.214101	0.930206
HGLibB_55825	CTGTATAAGTCCCTCTGAAC	ZNF383	3.64227	1.84517	1.59143	0.207122	0.913522
HGLibA_03289	TCTGGCAGGCCACGAAGCGC	ASGR2	3.64067	2.19201	1.66211	0.197319	0.888197
HGLibA_17925	TCCACTTCGAGCGGAGAGAG	FOXO3	3.64041	1.09018	1.50465	0.219958	0.943745
HGLibB_04091	GTGGCTCACACCTGTAATCC	BAGE	3.64022	-0.597021	1.50854	0.219363	0.942422
HGLibB_35136	CCACCAGGGTGTGAAGCGCT	PARD3B	3.63838	1.55773	1.5475	0.213505	0.928711
HGLibB_26663	AGCGCCCGAGATGATGGTGC	LMO1	3.63703	1.88157	1.59473	0.206651	0.912137
HGLibA_24169	CGCGGCGTTGGCGTTGAGGT	KCNC3	3.6367	1.27233	1.51606	0.218217	0.939933
HGLibA_00170	GTATCGAGAGAATCCAGAAT	ABCC2	3.63591	0.662351	1.49217	0.22188	0.948943
HGLibB_38801	GGCTGTAGTCCTCCCGAACA	PRR7	3.63017	2.93252	1.92228	0.165605	0.803077
HGLibB_34931	CTAGCCCGACGATGGCCCAG	PADI4	3.62967	1.79834	1.57327	0.209733	0.919898
HGLibA_63840	GAAGTCATCCACACCATGGA	hsa-mir-7153	3.62559	2.35856	1.69865	0.192465	0.874631
HGLibB_30959	TCACATCTCCCAGCTCGATC	NAA50	3.6242	3.98508	2.48253	0.115117	0.654566
HGLibA_15682	AAGCACAGACAGCCCGCATA	EVC2	3.62354	1.76127	1.56265	0.211278	0.923133
HGLibB_05007	GAAAAAGCAGAGGCGATGTG	BZRAP1	3.62307	1.99196	1.60591	0.205068	0.908298
HGLibA_26806	CCCAAAGGTAAACTATCCAG	LOC100132247	3.6226	0.514448	1.48056	0.223686	0.953748
HGLibB_52713	GCTCTTTACCAAGACGAGAC	UBXN10	3.62059	1.68246	1.55002	0.213132	0.927604
HGLibA_16993	GGCCGCCGTAGGGCCGACAA	FBXL19	3.61925	1.32595	1.50717	0.219572	0.942953
HGLibA_05973	CGTCTTCCAGGACTTCGACC	C1RL	3.61834	3.53581	2.22086	0.136158	0.71736
HGLibB_44189	AGCGGCTTGCCCCCTTCCAG	SIX1	3.61682	1.41968	1.51193	0.218845	0.941495
HGLibA_17490	TTGTAGCAGTCCACGCAGAA	FHL5	3.61653	3.38709	2.13565	0.143909	0.740468
HGLibB_35698	TGCCAGCGCTCATCCAGATC	PDCD7	3.61618	2.54861	1.75031	0.185838	0.857826
HGLibA_44986	TGGCACAGCGACACGGTCAC	SLC35E1	3.61499	0.0912892	1.47692	0.224256	0.954731
HGLibB_11281	ACTCTCTCCAGCTTTCACAC	CRYZ	3.60973	3.31908	2.09434	0.147845	0.752469
HGLibA_38139	TTGAAGCGGACATTGGCAAC	PPP2R1A	3.6094	3.20969	2.03803	0.153408	0.76868
HGLibA_01396	GATACGGTGCGGGGCGATAG	AK8	3.60939	2.41	1.70116	0.192137	0.87376
HGLibA_62407	CCTAGAGCACAAGAAGCTAC	hsa-mir-578	3.60614	2.12638	1.61929	0.203191	0.903077
HGLibA_33763	ATGCACGGAGTGCATCGTCC	OR2B11	3.60461	0.564725	1.46919	0.225474	0.95714
HGLibA_10454	CCCGCGGCTCGGGGACAGTA	COA6	3.60178	2.39869	1.69196	0.193342	0.877371
HGLibA_02431	TATAGACATAATACGCTTCC	APLF	3.59909	2.05828	1.60122	0.205731	0.909722
HGLibB_16176	CACACAGGCGGTAACAATGA	FAM159A	3.59874	0.547752	1.4645	0.226216	0.959018
HGLibA_22324	CATGCGGTTACACTGAGCCC	HSPBAP1	3.59828	2.54781	1.73564	0.187692	0.862258
HGLibB_06072	TGGACGCCCGCTCCAAGCGC	C22orf42	3.59656	2.63998	1.76957	0.183435	0.851229
HGLibB_56598	ACATCTGGAATCTTGGGGCC	ZNF746	3.59603	1.03028	1.47143	0.225121	0.956519
HGLibB_22757	CTACAAACTATATTGGCGGG	IGDCC4	3.59513	2.2509	1.64408	0.199767	0.893961
HGLibA_50596	GAGGAGGTGCTCGCGGTCAA	TMOD2	3.59198	2.41785	1.68993	0.19361	0.877963
HGLibA_52616	TACTAACCAGTAAATCGTGT	UBE2I	3.59186	1.59419	1.51753	0.217994	0.939399
HGLibB_40507	CCTGGAAGCAAAAGTAGAGA	RBM44	3.59009	0.99701	1.46732	0.225768	0.957858
HGLibB_37261	ACGATGTCTGCAAGAGACAG	PMFBP1	3.58889	0.0556566	1.4596	0.226994	0.960658
HGLibB_31759	ACCCAGAAGTCCACAGACAC	NFIB	3.58689	4.10729	2.4916	0.114455	0.652568
HGLibB_31529	TTTCACACCAGAAAACTATA	NDUFV2	3.58326	5.22095	2.7151	0.0994027	0.610043
HGLibB_11882	CGTTGCCGATCACGCCCAGG	CXCR5	3.5817	1.75595	1.53242	0.21575	0.934399
HGLibB_38186	TTACAGGGGGCCTTGTGTGC	PPT2	3.57894	1.63319	1.51363	0.218587	0.940917
HGLibB_53877	CCAGCACCTACCAGTAATCA	WARS	3.57883	0.501319	1.45092	0.228381	0.963865
HGLibA_48802	AGCGACTTGAACAGCGCGAC	TCHH	3.57694	5.61637	2.71761	0.0992466	0.609855
HGLibA_06624	GCTCCCGACAGCCTCCCATG	C8orf44	3.5766	3.71978	2.27563	0.131422	0.703306
HGLibA_63428	CAGCCTGGGGGTCTGGGGAG	hsa-mir-6813	3.57567	-0.101884	1.46172	0.226657	0.959862
HGLibA_49433	GCACCTCATTCTTAAGAACC	TIAF1	3.57397	0.981907	1.45584	0.227593	0.961969
HGLibA_52683	CGACTTCAAGACGCGGCCCA	UBE3C	3.57367	2.80495	1.81791	0.177562	0.836292
HGLibA_02874	GTCCGTGAAATTAAATCCAG	ARHGEF6	3.57247	0.307609	1.44346	0.22958	0.966738
HGLibB_14937	ATCCTCACCTTGTATAATCT	ELOVL2	3.57069	2.55544	1.71627	0.190174	0.868246
HGLibB_43578	TGTGGCTCACCCAGCAAGGT	SET	3.5696	0.974619	1.45419	0.227857	0.96252
HGLibA_25120	CTCCACGTAGAAGAGAGTCC	KLHL1	3.5674	1.8789	1.54323	0.214138	0.930333
HGLibB_31836	ATGGCAGGAGTCAAGGCATA	NGFRAP1	3.56664	1.75712	1.52133	0.217419	0.938167
HGLibA_57305	TGAACTCGTAGCTGGGGAAA	hsa-mir-1227	3.56583	2.37465	1.6568	0.198036	0.889576
HGLibB_04410	TATGGCCGAGGCTCTGCTTA	BEND6	3.56566	2.90749	1.85497	0.173207	0.823444
HGLibA_31672	GCAGATGAAGGGCGCCCTAA	NELFA	3.56506	0.303895	1.44331	0.229605	0.966762
HGLibA_34592	AGACGCAGTACCAGTACCCG	ORAI2	3.56476	0.105679	1.44366	0.229549	0.966738
HGLibA_34782	ACGGACGCGGGCGCTGAGCC	OTX1	3.56228	2.87455	1.83775	0.175215	0.829876
HGLibA_24263	GTCCCCATGAATAAACGCGA	KCNJ15	3.56191	0.928077	1.44767	0.228902	0.965038
HGLibA_43122	AAAACAACAAGCCGAGCGAG	SDE2	3.55959	1.1493	1.45638	0.227507	0.961822
HGLibA_02400	TGTAAACTTGATCACACCGC	APCS	3.5573	4.33975	2.56091	0.109536	0.639307
HGLibA_25665	CTATATCTTCTGTAGCATGA	KRTAP19-2	3.55545	-0.404427	1.44789	0.228867	0.964949
HGLibA_35945	TGATAAAGATGTTCGCTTAC	PDS5B	3.55497	-1.23518	1.45561	0.22763	0.962025
HGLibB_18637	GTATGTGCTGATCTTTGCAC	GAST	3.55216	1.98609	1.55245	0.212774	0.926509
HGLibB_36788	TCCCTTCCAGGTGCGCTCCA	PKMYT1	3.55169	2.52875	1.69107	0.19346	0.877674
HGLibB_44299	CTCCGTAGGGCTGCGGAAGC	SLC11A1	3.55081	0.285661	1.42978	0.2318	0.972411
HGLibB_21511	GCGCGTGACCATTATGCCCA	HIST2H3A	3.54629	0.91131	1.43569	0.230838	0.970052
HGLibA_48427	CGAATGCAGCTCAGTGCCAC	TAS2R7	3.5458	1.73796	1.50393	0.220067	0.943952
HGLibB_03429	ATCTGTCTTAGTTGTCTGAG	ATF1	3.5449	2.84812	1.81147	0.178332	0.837881
HGLibB_29085	GAACACGTGCAGTCCTTCAG	MGAM	3.54241	3.54073	2.14655	0.14289	0.737379
HGLibA_12032	CTCACCTCTTGTACGCTGAG	CYFIP1	3.5417	2.02287	1.552	0.21284	0.926612
HGLibA_20118	GTCCACGTGTTCAGTTGAAC	GPRASP1	3.53855	0.617843	1.42547	0.232505	0.974127
HGLibA_33173	CAAACGCCGCCGCTTATCCA	NXT1	3.5364	0.932146	1.4307	0.23165	0.972055
HGLibA_57725	GGGCATCCTGTCTTTTAATC	hsa-mir-1302-9	3.53497	0.177802	1.41975	0.233445	0.976652
HGLibB_03871	CCATATAGAAAATAATCCTG	AURKA	3.53376	1.13468	1.43495	0.230958	0.970321
HGLibA_58951	CAGGAAGAACTGGGAAGAGA	hsa-mir-320e	3.53183	-0.32753	1.42704	0.232248	0.973497
HGLibA_10829	TCACCGCGCTCGTTATCATG	COX4I1	3.53075	2.26774	1.59984	0.205926	0.910145
HGLibB_26624	ATCCGTGCTCTGAAGGGGTG	LMAN1L	3.52855	1.936	1.52594	0.216723	0.936344
HGLibB_46315	GGGCAGAAGCTGAAGATGCA	SPAG9	3.52571	1.89682	1.51672	0.218116	0.939725
HGLibA_31810	GATTATCAAGCAAGAGCCGA	NFIL3	3.5251	0.674806	1.41717	0.23387	0.977435
HGLibA_33484	GGTAACGAGGATACGCCCGT	OR10C1	3.52302	2.5549	1.67777	0.19522	0.882763
HGLibA_61906	GGTTGGTGCAAAAGGAATTG	hsa-mir-548an	3.52148	0.889702	1.41898	0.233571	0.976913
HGLibA_26835	CATGATGAAGTCGTAGATGC	LOC100288524	3.52129	1.53395	1.46001	0.226928	0.960491
HGLibA_62732	GGGAAGCTCCAGCACAGCTT	hsa-mir-623	3.51791	2.52883	1.66401	0.197062	0.887514
HGLibA_53006	GGTGCGATACATGTCCTCGA	UNC45A	3.51765	0.77617	1.41366	0.234449	0.978865
HGLibB_47603	TGATAGAGGAAAGGGCATCA	STX8	3.51502	3.17501	1.93121	0.164626	0.800241
HGLibA_04136	TGCCCCAGTGAACAAGCGAG	BAMBI	3.51481	3.24401	1.96584	0.160891	0.790272
HGLibA_33665	CCCATAATCCAGCAACCAGC	OR1F1	3.51037	1.10802	1.41824	0.233693	0.977014
HGLibA_52038	CGTCCTTAAGGGCGGCCGCT	TTBK1	3.50668	2.58476	1.67578	0.195486	0.88357
HGLibA_21929	TTGACAGCAGGCATCAGCGT	HOXB13	3.50464	2.41628	1.62132	0.202908	0.902282
HGLibA_13053	CATGGCAGGCCGTGGAACAC	DGCR6L	3.50423	1.61732	1.45931	0.22704	0.9607
HGLibB_07433	GACATACTGTTAGAGACCAC	CBWD5	3.49775	1.66183	1.46094	0.226781	0.960107
HGLibB_04190	GATGTCACTGAAGCCGTCAA	BAZ2A	3.49397	3.37314	2.01041	0.156223	0.776668
HGLibB_16095	TTGGTCGATTTAGATAATCT	FAM133A	3.49388	1.835	1.4823	0.223415	0.953195
HGLibB_42276	ATGGACAGGGGACTTATATT	RSPH10B2	3.49326	1.73917	1.46691	0.225834	0.958064
HGLibB_20349	ATCATCCGGTCTCACAGCAC	GRPR	3.49309	2.44108	1.61924	0.203198	0.903077
HGLibB_06775	CACCAACATTAAAAGTAAAA	C9orf92	3.49169	-0.957065	1.40683	0.235583	0.981606
HGLibB_33803	TGCCAAGGATGTGTGTACCA	OR2S2	3.49073	2.95471	1.81021	0.178484	0.838334
HGLibB_12830	GAAAAAAAGTTGAATCTTCA	DEFB110	3.48938	1.33447	1.41895	0.233576	0.976913
HGLibB_45258	GTACTGCAGCTTACTGTTCC	SLC6A17	3.48849	4.46128	2.50777	0.113286	0.648983
HGLibA_42778	CAGCGAACGCATGCAACACG	SATB2	3.48788	1.33165	1.41658	0.233966	0.977587
HGLibB_36125	CCCCTAGGGCTACCAGGGCA	PFKP	3.48633	1.98779	1.50478	0.219938	0.943729
HGLibB_23993	CATGAGACACGGAGTAGTGC	KANK2	3.48548	1.76579	1.46476	0.226174	0.95894
HGLibB_47527	AAAGGTCTGCAGCAGTGCTG	STRC	3.48494	0.829964	1.39274	0.237943	0.987546
HGLibB_33972	AACTGTGAAGAACGAATATC	OR4K1	3.48373	2.81865	1.74721	0.186227	0.858633
HGLibA_17705	TGCTGTCTTTGACGCAGTTA	FMO2	3.48314	2.29198	1.57018	0.210181	0.920599
HGLibA_32897	GCTGCGCTGAGAGTGTTCAG	NUB1	3.48187	0.208461	1.88126	0.170191	0.815809
HGLibA_48592	ATCCTTTATTCGTCCGAACA	TBCE	3.48184	0.623865	1.88373	0.169911	0.815259
HGLibB_16808	GATTGACTGTGACAGTTCTG	FANCA	3.48181	-0.378603	1.88702	0.169539	0.814497
HGLibB_10682	AGGTTTGGAATTACAAGCTT	COPA	3.48179	-0.746533	1.88897	0.169318	0.814262
HGLibA_08822	AGATCAGCCGGCGTTTGGAG	CDKN1A	3.48177	-1.13486	1.89098	0.169092	0.813557
HGLibA_34180	AGGACCGTCGTGTAGTGCAA	OR52K1	3.48177	-1.13486	1.89098	0.169092	0.813557
HGLibA_15885	GGATCAGACTCCCTGTCCTG	F8A1	3.48177	-1.37989	1.89172	0.169008	0.813366
HGLibB_42876	TCTGATCTGCAGCGTCCAGC	SCGB2B2	3.48177	-1.40965	1.89181	0.168998	0.813366
HGLibA_57148	CCTATAGATACAAGCTTGTG	hsa-mir-100	3.48176	1.50561	1.42963	0.231825	0.972483
HGLibB_05319	AGACAGCCGAGTGCGCCGTG	C14orf132	3.48175	-1.9727	1.89355	0.168802	0.812837
HGLibB_33174	GGATATCCAAGAAGAGTCGA	OAZ3	3.48174	-2.32547	1.89468	0.168675	0.812449
HGLibB_34106	TAGGAGGAATGACAACGTAG	OR52B6	3.48174	-2.35688	1.89479	0.168663	0.812449
HGLibA_42540	ATGGGCAGCCTTCAGCGCAA	S100A12	3.48035	2.62552	2.03488	0.153727	0.769514
HGLibA_05845	CCGTGCGAGCGCGTGCTCCT	C1orf233	3.47772	1.43746	1.41835	0.233675	0.977007
HGLibB_11473	GTGTCCATGGAACGGGGGCA	CSTF2	3.47601	1.77085	1.45886	0.227112	0.960777
HGLibB_48734	CCAGAGATCGATCCAAAGAC	TCF7L1	3.47412	1.98894	1.49627	0.221246	0.947067
HGLibA_02185	CAGCCTTTGGTACACTCAAC	ANO6	3.47384	3.37567	1.99197	0.158135	0.781697
HGLibA_58621	AGCATCTCCCGTCCCAGTGA	hsa-mir-3141	3.47382	0.668445	1.38188	0.239782	0.991657
HGLibB_39316	CCTCTAGCTCCCAGAGATGC	PTH	3.473	2.64987	1.67246	0.195929	0.884849
HGLibA_04530	CCATGACGGGTTATGAAGCC	BIRC8	3.4719	0.809934	1.38561	0.239149	0.990522
HGLibA_13613	TAATGCTTCTCTCGTTGAGT	DNAJC28	3.46619	0.800119	1.38041	0.240032	0.992233
HGLibA_46006	ACCAGGAGCCTTTCAAAGTG	SNTG1	3.46522	-0.706242	1.38542	0.239181	0.990529
HGLibA_37160	CAGTCCCAAAATGGAACATA	PLGLB1	3.46151	2.90602	1.76416	0.184107	0.853011
HGLibB_39612	GTGAGGAGGAGCACGTCTAC	PXN	3.46086	2.41263	1.58616	0.207875	0.915258
HGLibA_45670	CGTGGTCGTGCTCTTGATCG	SMCO4	3.45885	2.60957	1.64625	0.199471	0.893143
HGLibB_04825	TGGTGAATCTCCCGCTGCAC	BRK1	3.45824	1.00285	1.37785	0.240467	0.993313
HGLibB_27019	TGACGTACACGTAGATCCGC	LPAR3	3.45576	2.97451	1.78825	0.181139	0.845546
HGLibB_11228	TGCGTCTCGTTCCTTTCCAA	CRY1	3.45331	-0.51482	1.3774	0.240544	0.993521
HGLibB_45539	ACCTGCAATGAGTGCTGTGC	SMAGP	3.45253	2.31749	1.55408	0.212535	0.925899
HGLibA_09770	ACAGAAGCTTCCGGTAAATA	CKLF	3.45111	2.76758	1.69943	0.192363	0.874329
HGLibA_09362	AAGCAGTGCAAGTACTACCA	CHCHD10	3.45092	3.01524	1.80157	0.179523	0.840901
HGLibA_40748	AAATCGTCCCGGGTCAGCCA	RDH5	3.45036	3.21505	1.89163	0.169019	0.813366
HGLibB_37129	CGCTGACAGCAGCCGCCGTG	PLIN3	3.4494	1.52682	1.4098	0.235089	0.980301
HGLibA_22586	GGCGTGCGAGAACGACCAGA	IFFO1	3.44829	2.02019	1.48316	0.223281	0.952723
HGLibA_19857	CTGGGGCACCCGCTTCAGAG	GPR114	3.44783	2.00385	1.47961	0.223835	0.954218
HGLibA_63064	AGAGCAGAGAAGCATGGCAC	hsa-mir-6728	3.44469	1.95982	1.4696	0.225409	0.957097
HGLibA_24439	TACAGCCACCCACGTTCAGT	KCTD18	3.44448	4.71582	2.51196	0.112986	0.648005
HGLibB_28463	TAAACTTGCAAGAGATCGCA	MBLAC2	3.44398	1.15328	1.37591	0.2408	0.993918
HGLibB_33136	TGCGGGACATCGCCTCGCTG	NYAP1	3.44385	4.08325	2.3176	0.127917	0.69341
HGLibA_30490	ATACTATGCCCGCCTCTTCA	MTRNR2L8	3.44302	2.34425	1.55392	0.212557	0.925928
HGLibA_18283	GTAGAGCGGGTGGCGCTCGC	FZD8	3.43761	1.34159	1.87249	0.17119	0.818141
HGLibA_09361	CTCCGAGCTCCCCCCGCTGA	CHCHD10	3.4376	1.27576	1.37952	0.240183	0.99271
HGLibA_47192	TTTGCGGCCCATCCACAGAG	SSUH2	3.43756	-2.0511	1.86685	0.171836	0.819782
HGLibB_07118	CGAGGACAGCGAGCGCAAGG	CAND2	3.43756	-1.90559	1.8664	0.171888	0.819955
HGLibB_55449	AGGCGGCTCAGTGCCTCGCG	ZNF165	3.43755	-1.86238	1.86626	0.171904	0.819955
HGLibA_59259	TGCCCAGCACTGCAGGGCTC	hsa-mir-3677	3.43755	-1.83987	1.86619	0.171912	0.819955
HGLibA_62291	ATATTACAAATAATATCACA	hsa-mir-5692a-2	3.43755	-1.81894	1.86613	0.171919	0.819955
HGLibB_35982	TCTTCCCAGGGATGCCTCCG	PEG3	3.43755	-1.69465	1.86574	0.171963	0.820068
HGLibA_44694	TACTTGATATACCGTCCTGA	SLC25A28	3.43755	-1.53034	1.86524	0.172021	0.820246
HGLibA_61174	GGAGAGGTGGGATGGAGAGA	hsa-mir-4769	3.43754	-1.47912	1.86509	0.172039	0.820266
HGLibA_65369	CAAAGGGGGAAGTGCAGGGA	NonTargetingControlGuideForHuman_0986	3.43753	-1.15847	1.86413	0.172148	0.820564
HGLibB_41854	TAAAGCTGAAGCCAAAGCGA	RPL23A	3.43753	-0.95428	1.86311	0.172266	0.82087
HGLibA_08518	TTTCAGGCGCATCCAGGATA	CDC20	3.43751	-0.718408	1.86193	0.172403	0.821357
HGLibA_01071	ACATCCGCGTTGGCGAGGAT	ADRM1	3.43751	-0.662017	1.86165	0.172434	0.821388
HGLibB_01139	ACATCTGGTGCTAATCCGAG	AGAP2	3.43751	-0.653534	1.86161	0.172439	0.821388
HGLibB_53115	GTGGAGCATGCCTCCCTCGC	USHBP1	3.43751	2.3235	1.54418	0.213997	0.930013
HGLibA_22668	CTGCTGGATCATCTCATGGA	IFNA16	3.43749	-0.312901	1.85945	0.172689	0.821868
HGLibB_40510	CCTACACAGAAGAAGATCTG	RBM45	3.43745	0.0843266	1.85556	0.173138	0.823339
HGLibB_41497	GTCGTCCGGGAGCTGCGACA	RNF152	3.43745	0.117466	1.85525	0.173174	0.823352
HGLibA_06381	AATTCGCAACCAAGGCGCCC	C5orf38	3.43472	2.76763	1.68587	0.194147	0.879577
HGLibA_42923	TATAGATATGTCGGAATTGA	SCGB2A1	3.43309	1.75762	1.42698	0.232259	0.973497
HGLibA_32603	AAAACCTGAGCAGCCGTCGC	NR2E1	3.43236	1.76342	1.42727	0.232211	0.973465
HGLibB_01997	GAGCACTCGTTCGAGCCATT	ANKRD13A	3.43203	2.09205	1.48391	0.223163	0.952353
HGLibA_25364	CTTGCTCACAGACATTCTGA	KPNA4	3.4302	1.76507	1.42572	0.232465	0.974026
HGLibB_44291	ACCATTCCTTATCAGAACAT	SLC10A6	3.42978	3.02877	1.78874	0.18108	0.845367
HGLibB_24589	GGAAGGGTCAGCTCTTTATC	KIAA0319L	3.42897	1.85244	1.43943	0.230232	0.9684
HGLibB_27470	GTGCCGCCTGACGCAGCTGC	LRWD1	3.42388	3.79852	2.15728	0.141896	0.734568
HGLibB_44628	TGTCAACAAAGATGGGAAGC	SLC25A24	3.42229	-0.498108	1.35569	0.244286	1
HGLibB_09295	GGGCATCCAAGGAGCCGCTT	CGB1	3.42027	-0.970301	1.36056	0.24344	0.998623
HGLibB_31841	GTCTCACCGTATCTGCTCCA	NGRN	3.41886	1.26551	1.36553	0.242581	0.996901
HGLibB_29276	GATGGATCCTGCTTTGCAAA	MITF	3.41807	2.29151	1.52083	0.217494	0.938209
HGLibA_37309	ACTTACCAAAGCGTTACTGC	PMFBP1	3.41445	2.09225	1.47152	0.225106	0.956519
HGLibB_14498	TCAGCTTCTGCAGTTTCTTG	EFCAB1	3.4141	3.21468	1.85768	0.172892	0.822529
HGLibA_45867	GCCTAACTACAGCGAGCTGC	SNAI1	3.41349	3.13084	1.81945	0.177379	0.835874
HGLibB_07625	TGACAATGAAAAGCGTCTGA	CCDC147	3.41324	3.58627	2.04023	0.153186	0.76803
HGLibB_10264	TCGCACTCACCCTGAGGGCT	CNGB1	3.41154	1.4411	1.37317	0.241269	0.994641
HGLibA_54933	GCATCGGCTTCAATGACACT	ZBTB9	3.40967	1.1322	1.35154	0.245009	1
HGLibA_62204	ATATAGTGGGAGCTAAGCTA	hsa-mir-5591	3.40945	1.67636	1.40061	0.236622	0.984149
HGLibA_10714	CCTGGCACGACTGATGTAAC	COPS2	3.40915	1.58368	1.38913	0.238552	0.988929
HGLibB_41106	CTCCATAAATGTCGCACCCC	RHEBL1	3.40896	4.9116	2.47971	0.115323	0.654997
HGLibA_43989	GCTGGCCAAGTTGCACACGA	SHANK1	3.4085	3.02471	1.7677	0.183666	0.851914
HGLibA_57872	ACACACTGGCTTCCATAGTC	hsa-mir-147a	3.40692	2.22934	1.49635	0.221234	0.947067
HGLibB_30645	GAAGAGTACCGTTCACATGA	MYEF2	3.40598	2.1337	1.47232	0.224979	0.956243
HGLibA_05305	CTAGACCACTTTCTAGATGA	C12orf79	3.40473	0.301398	1.33035	0.248742	1
HGLibB_55456	GCCGAATGAGGTGGGAATTT	ZNF17	3.40428	2.48323	1.56164	0.211426	0.923337
HGLibA_28784	CCCTTCTTAGCGCCCTCCAC	MED24	3.40377	1.60824	1.38837	0.238681	0.989226
HGLibA_39353	ACAACGCACTCCATTTCTGA	PTGR1	3.40366	3.53326	2.00225	0.157066	0.779042
HGLibB_55876	GAACTCTCCAATGACGCGCA	ZNF415	3.40334	1.59909	1.38684	0.23894	0.989995
HGLibA_43307	TAATTACTCCCCCACCGAGA	SELPLG	3.40298	1.2394	1.35381	0.244613	1
HGLibA_41630	TAACCAGCAGTCTTCTTCGA	RNF216	3.40241	3.02435	1.76279	0.184277	0.853538
HGLibB_26601	TTCATCAGTTACCGTGCAGA	LITAF	3.40182	2.2857	1.50725	0.219559	0.942931
HGLibB_53213	TTGGCTGCTGGCTTCCATAG	USP17L4	3.40176	1.50085	1.37365	0.241186	0.994641
HGLibA_34591	ACGACAGGGCCTGTACCGAG	ORAI2	3.40161	2.13542	1.46949	0.225425	0.957118
HGLibA_12628	GGAGCATCGGGGCACCAGTT	DDO	3.40133	0.00671718	1.33437	0.248029	1
HGLibA_02071	ATCCACGCGGCCCGTGTAAG	ANKRD33B	3.40125	2.86506	1.6961	0.192799	0.875561
HGLibA_61342	AGCTCGGGGCAGCTCAGTAC	hsa-mir-486-2	3.40029	1.33673	1.35715	0.244032	0.999709
HGLibA_27153	GGCGACGATGACGCCCCCGA	LRFN1	3.39802	1.7791	1.40627	0.235676	0.981929
HGLibA_46920	TTCACACTCGGATCCTCCGA	SQSTM1	3.39777	1.68959	1.39392	0.237744	0.987058
HGLibB_30281	AACGAATATCGAAGAATGTT	MTBP	3.39693	1.25799	1.35046	0.245198	1
HGLibB_24152	CCTCGACGAGCTTACGGGAG	KCNE1L	3.39643	4.11874	2.27857	0.131173	0.702596
HGLibA_34078	GTGTAAAGACTCGACAAATC	OR51A7	3.39542	1.95447	1.43313	0.231254	0.971074
HGLibA_39649	AGAATCAGAGAGATCCAACC	PXDN	3.39013	-1.11432	1.35868	0.243767	0.999097
HGLibA_14847	TGTGGACGTGGGTCTTCCTA	EIF4G3	3.3901	-2.13411	1.36346	0.242938	0.997655
HGLibB_37221	GCTGCAGTTCATCCACACGC	PLXNB1	3.38794	1.61689	1.37848	0.24036	0.993228
HGLibA_28952	GAGCATCGGCGTGCATGAAG	METTL12	3.38675	0.444135	1.32274	0.250102	1
HGLibA_14495	CAAATATGGTCCTGCCGATG	EEF1B2	3.38479	3.78421	2.10771	0.146559	0.748585
HGLibA_64597	CCATTCTCAACCGGTCCAAT	NonTargetingControlGuideForHuman_0214	3.38282	1.60445	1.37314	0.241272	0.994641
HGLibA_03514	GACTACAATGAACCATTGAC	ATL1	3.38141	1.92772	1.41882	0.233597	0.976917
HGLibB_27667	TTAGTTTGAAACCTCTGTCC	LYN	3.38076	3.98234	2.20688	0.137396	0.720678
HGLibA_48611	GGTAACCTTGCTAGCACCTT	TBL1XR1	3.37945	2.6257	1.58839	0.207556	0.91449
HGLibA_34347	CGGGAATCACACCGCTCTGA	OR5P2	3.37832	1.52525	1.36024	0.243497	0.998695
HGLibA_09568	GACGTGGTGATTGTGCGCTT	CHRNA2	3.37703	2.05687	1.43814	0.230441	0.968919
HGLibB_04672	TCGCCAGGGGGCAACGAGGC	BOD1L2	3.37629	2.24811	1.47851	0.224007	0.954562
HGLibB_43526	TACGCCGTATCTCATCACCA	SERPINE2	3.3762	3.32672	1.8755	0.170847	0.817411
HGLibA_42755	TCGCCGCCGAGTGTCCGAAG	SART1	3.37524	1.29889	1.33845	0.247308	1
HGLibA_56259	GGGGGGACATTTCAATCAAT	ZNF566	3.37515	3.26453	1.83934	0.175028	0.829347
HGLibA_30985	GACACTCACCGTAAATGGGC	NAA25	3.37491	-0.910274	1.32754	0.249244	1
HGLibA_10108	GGCAGGGACACGCTCTATAT	CLPSL1	3.37447	2.53427	1.55305	0.212686	0.926301
HGLibB_09780	CGTCTAAAGAGAAGAATATG	CKS2	3.37415	2.30007	1.49013	0.222197	0.949931
HGLibB_05210	CTGTACTGACCTGCAGAAGA	C11orf93	3.37406	1.43673	1.34723	0.245763	1
HGLibB_40913	CAGCACTCCGGAACAGACCA	RFX2	3.37274	3.11497	1.77561	0.182689	0.848997
HGLibA_19699	GTACGGCCTAATGGCCGTGT	GP1BA	3.3716	3.23434	1.82797	0.176368	0.833161
HGLibB_21854	GTGAACTGTGAACAGAAGCA	HOOK3	3.37084	2.48445	1.5358	0.215243	0.933206
HGLibB_32957	CACGGTGGAGGGAAGAAAGA	NUFIP1	3.36818	1.10273	1.32142	0.250337	1
HGLibA_48361	ATGAAGGGGGACTACGTGCT	TAS1R3	3.3674	3.19174	1.80415	0.179211	0.839933
HGLibA_25101	CATAGACGACGATGCCGCCC	KLHDC4	3.36721	2.16795	1.45101	0.228366	0.963865
HGLibB_39056	ACCTTATACCCTCATGAGCA	PSMB3	3.36694	2.69383	1.60216	0.205597	0.909482
HGLibA_41025	TGTAAAAATGATGTTACTGA	RGPD1	3.36565	0.431728	1.30578	0.25316	1
HGLibA_25062	CAGTAGCTCATACCACGCTC	KLF17	3.36425	4.29446	2.31318	0.128281	0.694483
HGLibA_15122	TGAAGGCCCACGTCGTAGAC	ENDOV	3.36331	3.26758	1.83592	0.17543	0.830411
HGLibA_25595	CAGGTAGGCACGAAGCACAC	KRTAP10-10	3.36192	2.164	1.44645	0.229098	0.965612
HGLibA_30420	CCCCCTACCTGGATACGGGA	MTMR14	3.3611	1.57711	1.35483	0.244436	1
HGLibB_45323	CAGACACAGTCAATCGCTCA	SLC7A6OS	3.36093	-0.350712	1.31329	0.251801	1
HGLibB_20583	TTACAACTTCAAGAAAATTA	GTPBP4	3.35937	1.53568	1.35053	0.245185	1
HGLibA_59032	CTTCAGAGCAACAGAGAGGC	hsa-mir-346	3.35926	0.729166	1.30698	0.252942	1
HGLibA_03935	GGCCTATCATGCATATCGAG	AZI2	3.3591	1.59916	1.35651	0.244144	0.999932
HGLibA_54196	CCCGCCGAGCGAATGTAACC	WDR83OS	3.35841	1.29264	1.32628	0.249469	1
HGLibA_27271	GGTCTTTCTCGGTGTCGTCG	LRRC18	3.35798	1.5297	1.34691	0.245818	1
HGLibA_35615	CCAGCCGAGAGGCGATGCGT	PCK2	3.35756	1.46753	1.33934	0.24715	1
HGLibA_56218	AGAGAAAAACCTTATACGTG	ZNF552	3.35612	2.16948	1.44334	0.2296	0.966762
HGLibB_25807	GTAGCAGGGTGTGCTGCAGC	KRTAP9-6	3.35519	1.81576	1.38083	0.23996	0.992018
HGLibB_51856	TCGGTTCGGAGGTGCCATAA	TSPAN2	3.35447	1.65058	1.35944	0.243634	0.99896
HGLibA_39976	GAACAGATCTTGCTGACAAG	RAB6C	3.35113	0.678933	1.30159	0.253922	1
HGLibA_52508	ACGAACCCTACAGAACCAGT	UAP1	3.35053	1.6279	1.35381	0.244613	1
HGLibA_29332	TCGTTCCCGGCCGGAGAGAT	MKL1	3.35007	1.17001	1.31351	0.25176	1
HGLibA_36283	GCCGGGAGCCCGCGCGATAG	PGPEP1L	3.34875	1.61222	1.35058	0.245177	1
HGLibB_56222	CTTGCCAGTGGGACTAGGAT	ZNF575	3.3482	2.70115	1.58953	0.207393	0.914099
HGLibB_37669	ACATGAACAAAAACAGGAAG	POTEB	3.34737	0.193897	1.29448	0.255224	1
HGLibA_48877	TCGCTGCAGCTCCAAAGACG	TCTN3	3.34637	1.51671	1.33831	0.247332	1
HGLibB_49486	TTGACAGGTTGCTTCAAAGA	TINAG	3.34504	2.77085	1.61306	0.204062	0.905456
HGLibB_36120	GAGGATCTTACCCACAGTGG	PFKM	3.34141	1.2766	1.31416	0.251643	1
HGLibB_39144	CTGATCCCCAAGATTGAAGA	PSME2	3.339	1.64646	1.34798	0.245632	1
HGLibB_26479	CCCAGGACCCACATGCAGGC	LILRB4	3.33833	1.21459	1.30847	0.252672	1
HGLibB_34779	CCCGGAGCGCAAGCCCCTGA	OXLD1	3.33766	2.87591	1.64545	0.19958	0.893401
HGLibA_06909	CGTCTGGAGCAGGAGGTCGA	CACNA2D2	3.33337	4.0327	2.17267	0.140482	0.730253
HGLibA_15349	CGGCTGTCACAGATGAGGCG	EPO	3.3329	0.11923	1.28608	0.256772	1
HGLibA_55600	ACGACCTCGTTGATCGTTGC	ZNF217	3.33235	1.14489	1.30013	0.254189	1
HGLibB_06403	CCATGTCGAAGAAACGCAAA	C5orf54	3.33101	5.84462	2.40658	0.120826	0.67181
HGLibA_38821	GGAGGACGTCGTCGTTGAGC	PRR23A	3.33049	1.62027	1.33916	0.247183	1
HGLibA_12923	CGAGCCGCAGCGACTTCGAG	DEGS2	3.32924	2.17055	1.42402	0.232744	0.974622
HGLibA_41800	AGGTACTTACGATGACTTGG	RPA1	3.32837	1.58841	1.33384	0.248124	1
HGLibA_62070	AGGATGGTGCAAAAGTAATG	hsa-mir-548u	3.3279	1.45324	1.31763	0.251018	1
HGLibA_30254	GCGGTAGACCGCACGGAGTC	MST1	3.32597	2.31793	1.45878	0.227125	0.960792
HGLibA_62755	TTGAGGCAGGCAGAGGGGAG	hsa-mir-629	3.32543	-0.0374808	1.28346	0.257257	1
HGLibA_65195	GGATTAATTCGCTAAATGAT	NonTargetingControlGuideForHuman_0812	3.32409	1.71058	1.3452	0.246119	1
HGLibB_53173	GGGGGACGACTCACTCTACT	USP17L1P	3.32403	1.70837	1.34525	0.246111	1
HGLibA_54959	AGAGTCCCAGACTACATCCA	ZC3H12C	3.32294	3.26182	1.79628	0.180163	0.842735
HGLibB_49323	GCTGGCTGTCCGGATGTCCT	THOP1	3.32219	3.22397	1.7771	0.182506	0.848571
HGLibB_56220	GGCTCCTGAGACTCGGGTAC	ZNF574	3.32111	1.6147	1.33214	0.248425	1
HGLibA_61624	AGACAGTGCTTCCATCTAGA	hsa-mir-517a	3.3205	0.522938	1.27794	0.258282	1
HGLibB_37118	TAGGTGAGGATAAAGCTTAA	PLGRKT	3.32028	2.58583	1.52815	0.21639	0.935746
HGLibB_48828	TGATAAAAAGATGTTCATCA	TDO2	3.31983	2.51953	1.50582	0.219778	0.943409
HGLibA_50139	ACTTACGACCTATTTCTCCG	TMEM19	3.31465	4.05028	2.16022	0.141624	0.733696
HGLibB_56876	AGGCCAAGCGAGCAGTACAG	ZNRF3	3.31327	0.894497	1.2796	0.257973	1
HGLibA_35550	ATGGGATTGAGCGCCCGCTA	PCDHGB1	3.31252	1.0052	1.28047	0.257812	1
HGLibA_14563	CCGATCTTGCGGTAACCATC	EFEMP2	3.31202	3.6029	1.94615	0.163002	0.796322
HGLibB_48691	CGCCAAGACTCGTGCTCCTG	TCEB3CL	3.31166	3.35321	1.82353	0.176894	0.834802
HGLibA_58194	CGTGAGCATCAGGTATAACC	hsa-mir-208a	3.31122	1.39314	1.30098	0.254035	1
HGLibA_56360	ACCAGAGCTGATCTATCTAC	ZNF599	3.31014	3.30268	1.80148	0.179534	0.840901
HGLibA_18598	GTACGACACGTACCCACTCT	GAMT	3.30964	1.1834	1.28795	0.256427	1
HGLibB_18448	GAAGCCTGAAGCTCATAGCC	GAGE2C	3.30827	2.25386	1.4295	0.231847	0.972508
HGLibA_38204	GCTCATTGAACGATTTGATG	PPP4R1	3.30821	1.25277	1.29035	0.255983	1
HGLibB_51666	TCTCTGCCGAGACTCAGAAG	TRPC3	3.30782	1.00879	1.27733	0.258397	1
HGLibB_13252	AGCAAGACGATCTATGAGTT	DIS3	3.30774	2.26529	1.43198	0.231442	0.971514
HGLibB_09386	AATCCTCCTCTGAGAACACG	CHD4	3.30633	-0.183207	1.27261	0.259278	1
HGLibA_48343	CAGGATGTCTACACTATAGC	TARP	3.30612	0.857432	1.27421	0.258979	1
HGLibA_18492	GAGGCTATTATCCAATGAAG	GAK	3.30011	1.34231	1.29047	0.255961	1
HGLibA_25188	AGCCACCGCTCACGTACAAC	KLHL33	3.29569	1.60143	1.31306	0.251842	1
HGLibA_07761	TAACCATAGCTCTTTGCAGC	CCDC34	3.2954	4.40075	2.26318	0.132482	0.706481
HGLibB_02966	CACCACCTATCACGTCCAGC	ARL4C	3.29298	3.41508	1.83704	0.175298	0.830042
HGLibA_21082	TGGTAGGGCTCCTCCAAATA	HEATR6	3.29292	0.342743	1.25671	0.262274	1
HGLibB_17050	TCACAAAGGAAGTACTAAAG	FBXO32	3.29131	1.53706	1.30296	0.253674	1
HGLibA_34430	GATAGCACTCAGTCGCTCCA	OR6N1	3.2907	3.68555	1.96323	0.161169	0.790998
HGLibB_30601	TATGAAGTACCACAACAAAA	MYBL1	3.29059	1.64822	1.31545	0.251409	1
HGLibB_14276	TAAAGGCCTTGTCACAAAAA	DZIP1	3.29049	3.72164	1.9787	0.159528	0.785769
HGLibA_05982	TGAGCAAGCTCGAGTCTTCG	C20orf111	3.28973	-0.956159	1.27796	0.258279	1
HGLibB_52240	CCCATCAGGTGGCCAGCGTG	TUBG2	3.28767	2.04178	1.3712	0.241606	0.994977
HGLibB_10630	TCTTGTTCTCAGCGATGAGC	COLGALT1	3.28616	2.59964	1.50568	0.2198	0.943432
HGLibB_06343	AGTGTCCAATTGAAAGAAGA	C4orf6	3.28576	3.99585	2.1082	0.146512	0.748473
HGLibA_39830	TTGTAATAGTGGGACACAGC	RAB1A	3.28479	3.1366	1.70643	0.191449	0.871579
HGLibB_18323	AACTGTACAGCTTAGTGTAC	GABPA	3.28432	3.90782	2.06363	0.150851	0.761136
HGLibB_42250	GTGATGATGGGCCTATAATG	RSBN1	3.28416	2.07212	1.37377	0.241166	0.994641
HGLibB_01019	CTGCTTGATACTCTAAAATG	ADPGK	3.28338	1.33074	1.27868	0.258144	1
HGLibA_56873	CAAGGGACGTGCTGGGAGGA	ZNF850	3.28158	3.29225	1.77018	0.18336	0.850935
HGLibA_54657	GCAACATTACCGTAAACTAT	YEATS4	3.28105	3.51681	1.87402	0.171015	0.817736
HGLibA_10521	TATGCTAAAACAGCCTCTCT	COL17A1	3.27982	2.47461	1.46341	0.226389	0.9595
HGLibA_46129	CACAGCAAGTTTCCCGCCGC	SOCS3	3.27953	0.752921	1.25567	0.262472	1
HGLibB_13903	GTTCCTCGTGGCCTGTATGA	DPYSL2	3.27794	3.17158	1.71535	0.190293	0.868559
HGLibA_34054	ACTACACCATTATTATGAGC	OR4P4	3.27793	2.13554	1.37961	0.240168	0.99271
HGLibA_44593	AGCCGGAAGGCGCAGTAGAT	SLC22A6	3.27524	1.02977	1.25681	0.262255	1
HGLibB_07546	GGGGGCTCACCTGCTTCGCG	CCDC115	3.27453	1.9883	1.35295	0.244764	1
HGLibB_05540	GTGAAACTCCAAGGGGCGTA	C17orf51	3.27421	1.94755	1.34616	0.24595	1
HGLibA_34729	ACACTCGCCTCCATTGAAGC	OTOG	3.2734	0.975345	1.25473	0.262651	1
HGLibA_42861	CACTCATAAAACTACTAAAC	SCAPER	3.27248	2.64343	1.50909	0.219278	0.942406
HGLibA_64588	GCAAAAACCCAACGCTATTC	NonTargetingControlGuideForHuman_0205	3.27168	1.24437	1.26562	0.26059	1
HGLibB_30748	CTGGTGCTCAGCACATGCTT	MYLK3	3.26893	1.48631	1.28156	0.257609	1
HGLibA_61530	ATCCTCCTAGCTCAGGAAGG	hsa-mir-5093	3.26869	0.985104	1.25134	0.263296	1
HGLibA_12703	GGATCTCGTAGTGATTCAAG	DDX3X	3.26745	1.249	1.26331	0.261025	1
HGLibA_38498	CCTTGATAGACAGCGCGTAT	PRKAB1	3.26516	1.74041	1.30849	0.252668	1
HGLibB_04865	TTCGCGCTGCTGGGCACCCA	BSG	3.26431	3.09993	1.67192	0.196002	0.885012
HGLibB_45347	CCCGCTCTCCACCAGCTCGA	SLC9A1	3.26399	0.919303	1.24793	0.263949	1
HGLibA_63413	AGAGAAGCAGCATTATGCAG	hsa-mir-6809	3.26382	1.45774	1.27503	0.258826	1
HGLibA_11466	GAACAGGCACCTCGAAGTGC	CST7	3.26313	1.06996	1.25087	0.263386	1
HGLibA_51397	GGCGGATCTTGCCGAAGAGC	TRIB3	3.26309	1.58114	1.28859	0.256308	1
HGLibA_59295	AGACTTGAGATTATAGTCTT	hsa-mir-3685	3.26191	2.66749	1.50924	0.219255	0.942406
HGLibB_12937	CTCCAAGCAAACTTGAACTA	DENND4C	3.26133	2.66606	1.50807	0.219433	0.942597
HGLibB_39693	GACCATACCTCCTGAACTGC	QRICH2	3.26131	2.88119	1.5837	0.208228	0.915955
HGLibB_25479	AATATGAGGAGATTGCTCAG	KRT6B	3.26064	-0.923996	1.25897	0.261845	1
HGLibB_43846	CTACCAGTGCTGGGCGCCCC	SH2D4A	3.25987	2.97498	1.61933	0.203185	0.903077
HGLibB_49050	ATTTGGACATCCCCGAAGGC	TEX38	3.25948	1.92046	1.33147	0.248543	1
HGLibA_26760	GCCCGCGGACCTCCTAGCGA	LOC100129361	3.25806	0.875102	1.244	0.264701	1
HGLibB_14398	CGGAGCACAGCGTGCGTAAG	ECSIT	3.25771	2.07996	1.35617	0.244203	1
HGLibA_64156	TCCCAGGCCGGTCAGCCCGG	hsa-mir-8078	3.25648	1.56159	1.28182	0.257561	1
HGLibB_14597	CTCCATCAGAGTGAATTTCT	EFTUD2	3.25309	2.61211	1.48396	0.223157	0.952353
HGLibB_52687	AGCTGATGGACCATCAGAAA	UBR3	3.25285	2.70866	1.51595	0.218233	0.939962
HGLibB_20135	CGGTACATTGAGAGGCGTGA	GPT	3.25253	2.19775	1.37501	0.240953	0.99427
HGLibA_09998	GCCTACCTGTAGAGCTCTTG	CLEC4M	3.25191	2.20191	1.37547	0.240874	0.994078
HGLibA_47578	GACTTGAACAAACCTGAAGC	STRAP	3.25014	1.34823	1.25776	0.262075	1
HGLibB_33036	ATTGAAAATAGAAACTGCTC	NUPL1	3.24966	3.39683	1.78779	0.181196	0.845678
HGLibB_19904	TGACTTGCTTTGAGCGTATC	GPR151	3.2469	1.40468	1.2588	0.261878	1
HGLibB_52211	TCCAGACCTGACAGAGTCCA	TUBB2A	3.24635	3.19186	1.69462	0.192993	0.876212
HGLibA_57245	GATTAATGGCGAATATACAG	hsa-mir-1185-2	3.24487	0.0362728	1.22928	0.267547	1
HGLibB_39960	CTGGAATATCTCCAAACGAA	RABGAP1L	3.24486	2.87558	1.56888	0.21037	0.921117
HGLibB_03204	CTGGTCTCTGACATACGAAG	ASB10	3.24458	0.585448	1.22936	0.267531	1
HGLibB_26960	TACAATAGTCAAATTCATAG	LOC729059	3.24396	0.624282	1.22953	0.267499	1
HGLibB_34970	AGATCCCAATCCTCAGAAAG	PAGE5	3.24316	0.268918	1.22491	0.2684	1
HGLibA_54178	CGGGATTGTCACCCTACGAA	WDR76	3.24237	2.02882	1.33691	0.24758	1
HGLibA_13410	CGGCTCCGAGTTGGACGATG	DMP1	3.2419	3.51174	1.83385	0.175674	0.831045
HGLibB_16916	GTGGATGCCCCTTTCTCAAC	FBLIM1	3.24163	2.24803	1.37922	0.240234	0.992884
HGLibA_27743	TCATCAGGTGATTCTGGACA	LYPLAL1	3.24088	7.64783	2.24156	0.134345	0.711374
HGLibA_04582	CGTCAAAACCGTGATGCACA	BLZF1	3.24079	3.56864	1.85534	0.173163	0.823352
HGLibA_50847	GCGTGAGCACCACCCCGTAG	TNK2	3.2403	1.85916	1.30825	0.252711	1
HGLibA_47568	ATCTGAGGAACCTCCTTTGC	STRA6	3.24016	5.77113	2.29669	0.12965	0.698502
HGLibA_64558	TTCAATCACCTCACGGTAAG	NonTargetingControlGuideForHuman_0175	3.2386	1.51954	1.26521	0.260667	1
HGLibA_46130	GCTTGAGCACGCAGTCGAAG	SOCS3	3.23804	1.91592	1.31553	0.251396	1
HGLibA_33015	GTCAGCCGATGGGCTCCGAG	NUMBL	3.23774	3.70982	1.92078	0.165771	0.803496
HGLibA_19673	AGTGAAACTCCGCTAGATGA	GOPC	3.23674	1.54849	1.26714	0.260304	1
HGLibA_43686	CCGTCACACTCACGTCCCCA	SEZ6L2	3.23582	2.10788	1.34493	0.246166	1
HGLibA_32171	TAAACCAGATGCAATATCAA	NME7	3.23504	1.07989	1.23204	0.26701	1
HGLibB_27736	GATACCTGTCCAAGAAGAAA	LYST	3.23479	2.21439	1.36602	0.242497	0.996775
HGLibA_57778	ACCAGCTCTAGCAAAGCATT	hsa-mir-133a-2	3.23479	1.30734	1.24495	0.26452	1
HGLibB_31787	CGAAGCAGCAATTCCATGAG	NFKBIE	3.23419	1.19522	1.23819	0.265819	1
HGLibA_23146	CTTAATCTCATGCCGACATG	IL36A	3.23232	2.79317	1.52928	0.216221	0.935525
HGLibA_57063	TTGATACGTGAAGATCCCGG	ZW10	3.23208	3.64785	1.88752	0.169482	0.814497
HGLibB_02084	CTACTATATACCTTGATCAG	ANKRD36	3.22923	0.144245	1.21817	0.269719	1
HGLibA_35999	GCTCACGTCCGCAACTTCGT	PDZRN4	3.22897	3.13467	1.65657	0.198067	0.889576
HGLibB_44654	GCATGGTGCCCTTCAGTTTA	SLC25A32	3.2276	2.23662	1.36647	0.24242	0.996735
HGLibA_16812	GCCGGGTCCCCAACCGACGA	FAM98B	3.22695	-1.39587	1.23218	0.266984	1
HGLibA_09644	TGCCAAGATCCGCCGCGTGC	CHST6	3.22663	2.26928	1.37326	0.241252	0.994641
HGLibA_23665	TGCGCTCATGAAGGAGCAAC	ISL1	3.22571	2.89298	1.5596	0.211724	0.924105
HGLibA_63941	ATGTGGTGCTGGGGCCTCAG	hsa-mir-770	3.22463	1.86699	1.29875	0.254443	1
HGLibB_32464	ATCCCGAGAATGGTGCCTTC	NPR1	3.22411	3.06024	1.62223	0.202782	0.901921
HGLibB_42793	AGCCATCATGTTCTCCGTGT	SCAMP4	3.22404	2.57643	1.45019	0.228498	0.964047
HGLibB_09942	TCTTCCCTCTCAATAAGACC	CLEC19A	3.22201	2.02017	1.32122	0.250372	1
HGLibA_60642	ACCGGCCCGGGGCTCTTGGG	hsa-mir-4634	3.22167	0.99803	1.22102	0.269161	1
HGLibA_57455	GAGTAATAATGCGCCGTCCA	hsa-mir-126	3.22097	1.44632	1.24507	0.264496	1
HGLibA_46907	ACTCTGCGTGATTGTACTCG	SPTY2D1	3.22007	0.528925	1.21406	0.27053	1
HGLibB_14312	ACCACCCATGACTGTGTTCA	EAF1	3.22004	3.43569	1.77776	0.182424	0.848571
HGLibA_55049	TCCTCTAGCACAATACTGGA	ZCCHC8	3.21883	1.33449	1.23593	0.266256	1
HGLibA_07738	CAGTTACCTTATGTAATCGA	CCDC25	3.2184	1.22046	1.22926	0.26755	1
HGLibB_46483	TCAGGTCCGCGTTCTCGCTC	SPATC1L	3.21797	2.1621	1.34164	0.246745	1
HGLibB_49341	TCTGACACCATCCCCACATG	THSD1	3.21752	2.85831	1.54032	0.21457	0.931478
HGLibB_40192	GAAAAGACTGTTGATTAACC	RAP2C	3.21715	3.10054	1.6324	0.201372	0.89818
HGLibA_32280	CCGTTTCAGCGTGGGATCGA	NOL9	3.21617	1.06955	1.2189	0.269577	1
HGLibA_43114	CCGGCCGAATGCCGAAGAAG	SDCCAG3	3.21587	2.81183	1.52227	0.217276	0.937835
HGLibB_19433	AAATGTTAAAGATGCTATCG	GNAL	3.21519	2.05313	1.32184	0.250262	1
HGLibA_27322	TCACTAAGCCCATCGAAGAG	LRRC36	3.21145	2.97937	1.58029	0.208719	0.91712
HGLibB_20829	CAAGCTTATCTATGACCTGA	HARS	3.21139	1.02275	1.21477	0.270389	1
HGLibA_33311	TGAGCTCGGCATTATCATAG	OGFOD2	3.21132	1.08396	1.21672	0.270004	1
HGLibB_25642	TACTACAGAGGCCTGGGATA	KRTAP19-6	3.21125	0.267957	1.20483	0.272359	1
HGLibB_04053	GCTACAGAGCTCGCGGGGGT	BABAM1	3.20987	2.60744	1.44909	0.228674	0.96456
HGLibB_57322	TTTCGTGCCGATGTAACACA	NonTargetingControlGuideForHuman_0294	3.20909	0.135207	1.20552	0.272221	1
HGLibA_45601	TTAATTTCAGCTACCGCCAT	SMARCA1	3.20886	3.62915	1.85638	0.173044	0.823023
HGLibB_20578	GTTGTAAATCCATGTGGCGG	GTPBP3	3.20881	2.14524	1.332	0.24845	1
HGLibA_51995	GTGATGTGGCTGCTCGAATT	TSR1	3.20871	0.356923	1.20248	0.272827	1
HGLibA_59099	CCAGGGCAGAGAAAGGACAT	hsa-mir-3617	3.20854	1.84963	1.28467	0.257032	1
HGLibB_45575	CAGTGCAAAGAAAAAGAAGA	SMARCD1	3.20854	1.64813	1.2598	0.261688	1
HGLibA_27842	GACGCGCATCCGGCAGCTTC	MAD1L1	3.20701	3.4913	1.79053	0.180861	0.844832
HGLibB_22687	TCCCAATTCCCGGGGAAGAC	IFNL1	3.20477	1.59794	1.2515	0.263267	1
HGLibA_02122	CTCGGCCAATGCCAATGATG	ANKRD54	3.20469	3.04423	1.59914	0.206025	0.910351
HGLibB_31229	TGTGTTGTTAGAAAGCCCAG	NCAPG2	3.20329	1.76387	1.26857	0.260035	1
HGLibA_26651	GTAGCCGATCAGGATCTGGT	LLGL2	3.20167	1.12332	1.21294	0.270751	1
HGLibB_57200	TAGGCGCCCGTAGCATTGGA	NonTargetingControlGuideForHuman_0172	3.2014	-0.0821657	1.20306	0.272711	1
HGLibA_14861	GACATCTCCACGATCTTACA	EIF5AL1	3.20108	2.91151	1.54654	0.213647	0.929096
HGLibA_27339	CGCACCCAACAAAGATGCGG	LRRC38	3.19934	2.49927	1.40856	0.235295	0.980778
HGLibB_03892	GAAGGATCCCAAGTATATCT	AVL9	3.1989	1.45239	1.23106	0.267201	1
HGLibA_14361	CTCTCGGTACCCGATCGCCG	EBI3	3.19868	5.09866	2.23407	0.134998	0.713349
HGLibB_17402	CACCAAAGCTCCCGAGTGTG	FGFBP1	3.19855	5.14123	2.235	0.134917	0.713189
HGLibA_25616	TGTGGAAGCCCCAGAGCAGA	KRTAP10-6	3.19836	2.08913	1.31565	0.251375	1
HGLibA_53449	CGAGCCGTACCAGATCCTGC	UTP23	3.19602	2.06022	1.30922	0.252536	1
HGLibA_32185	GGAAGGTACACAGTTGTCAA	NMNAT1	3.19488	1.68814	1.25473	0.262651	1
HGLibB_06034	CTTGCAATCTTTCCCGTCCA	C21orf33	3.19473	4.71767	2.21099	0.137031	0.719451
HGLibB_12726	GAGTGGCCCCTTCGGCCATC	DDX53	3.19432	5.55681	2.24422	0.134115	0.710898
HGLibB_55341	CCTGTTCGTGCAGTTTGCTG	ZMYM6NB	3.19327	3.47902	1.77132	0.183219	0.850712
HGLibA_43468	GTACCTCTGCTTTCTCTGAG	SERF1A	3.19237	0.568326	1.19585	0.274153	1
HGLibA_57908	AAATGACACTGGCAGCTGTG	hsa-mir-153-1	3.19204	2.00363	1.29769	0.254636	1
HGLibB_27701	TAGGCTCTTCAGAAGAGTAA	LYPLAL1	3.19101	1.50248	1.23174	0.267069	1
HGLibA_34555	ACACTCGCTTCAAACAGCTC	OR8U1	3.19092	2.14245	1.31884	0.250801	1
HGLibB_18290	GACACACTTACCAGATGGTG	G6PD	3.18899	3.37706	1.72048	0.189631	0.866677
HGLibA_46973	CCGTGGAGTCAGGGGAGCGT	SRGAP2B	3.18884	1.36752	1.21824	0.269707	1
HGLibB_45566	CTAGTCGCCTCCAGAGTGAG	SMARCB1	3.18827	2.35633	1.36609	0.242485	0.996775
HGLibB_45857	TCCATCAGGGGCTCAATCAG	SNCB	3.18618	-0.562377	1.20007	0.273307	1
HGLibB_08343	ACCACAGCCGAGCTCGTCGC	CD320	3.18514	4.1831	2.06546	0.150669	0.760725
HGLibB_52317	CAGAATACTAATAATGCGAA	TWISTNB	3.18457	1.11783	1.20189	0.272944	1
HGLibB_44950	CCTAATTTATACAGTGATGC	SLC35F2	3.18428	2.14493	1.31441	0.251598	1
HGLibA_43642	AGTTCTTCTCGGTGTCCAAA	SETD2	3.18348	2.77609	1.47167	0.225082	0.956519
HGLibB_30677	CAAAGGGAAGAGGCGATCAG	MYH15	3.18303	1.39064	1.21565	0.270217	1
HGLibB_13423	CCTCTCCTTACCTTCCCGGG	DMRTC2	3.17962	3.10748	1.60264	0.205529	0.909382
HGLibA_07661	GGCTCACGGTGCGGCGCTTC	CCDC157	3.17894	1.10581	1.19768	0.273787	1
HGLibA_00653	CGCTCAACCCGAGTAAGAAC	ACTR1B	3.17893	4.2098	2.06527	0.150688	0.760725
HGLibB_57727	TGGGGACGTTTATCAATATA	NonTargetingControlGuideForHuman_0699	3.17859	-1.70656	1.23369	0.266691	1
HGLibA_42294	GCATGCAAGTGCGATTGCCA	RS1	3.17646	1.2751	1.20483	0.272358	1
HGLibB_14821	CCAGCAGTATGACCCCTTTA	EIF4G2	3.1763	1.24893	1.2031	0.272703	1
HGLibA_34485	CACCAGCATCTTTGGGATCG	OR7G2	3.17611	0.866325	1.18946	0.275438	1
HGLibB_14291	TCTTATTACAGGCAAAGCGA	E2F3	3.17609	1.67066	1.24038	0.265397	1
HGLibB_25805	TGCTACCAGCCCATCTGCTG	KRTAP9-6	3.17609	0.988648	1.19175	0.274977	1
HGLibA_13976	ATCACATCGATGAACTCGTC	DRG2	3.17595	1.29185	1.20564	0.272197	1
HGLibA_05624	TTCCGAAAGAGACATCGCAA	C18orf8	3.17576	0.562952	1.18438	0.276465	1
HGLibA_46228	ATGGAGCGCCCGTCCCGCTT	SOX10	3.17535	0.680911	1.18667	0.276001	1
HGLibB_06764	CACCTGGCGGATAGCAGTAC	C9orf89	3.17502	2.44703	1.3758	0.240818	0.993948
HGLibA_59195	TACAGCTCACCTTCTCGCAG	hsa-mir-3661	3.17436	-0.477921	1.21559	0.270228	1
HGLibA_36331	TGGCGATCGCAAAGACACAC	PHF1	3.17325	4.0778	2.01451	0.155801	0.775618
HGLibA_45797	CTCGATATGCAATCTCTAGC	SMOC2	3.17237	0.893332	1.18748	0.275838	1
HGLibA_13111	CATCTTATAAAGTCCGTCCA	DHODH	3.17055	1.54244	1.22228	0.268914	1
HGLibB_15912	TCGACACAATTACCACAAAG	FADS1	3.1704	1.55207	1.22322	0.268729	1
HGLibA_13992	GTCAACTCCAGGACCTCTTA	DSC2	3.17021	1.20564	1.19704	0.273914	1
HGLibA_40227	GAAGTTGGACGCGATCATGT	RAP1GAP	3.16954	1.64871	1.23345	0.266737	1
HGLibB_04411	TCAGTCTGATGCTCTTCCTC	BEND6	3.16924	5.49559	2.21487	0.136686	0.718791
HGLibA_42035	CACAACTTTGCCAATTGTAC	RPP30	3.16897	3.18404	1.62414	0.202516	0.901364
HGLibA_58293	TACATTGTCTGCTGGGTTTC	hsa-mir-221	3.16881	1.74446	1.24339	0.264818	1
HGLibB_07474	GGGAGAAATTGCAAGCAGCG	CC2D2A	3.16878	1.03913	1.18732	0.27587	1
HGLibA_14028	TCATGGAGAATTGCGAATAG	DSG3	3.16803	2.21536	1.31844	0.250872	1
HGLibA_44967	CGGATCTAAATATCATATGC	SLC35B4	3.16706	1.68402	1.23557	0.266327	1
HGLibB_37904	GAAAGCTACGCAGACTTTCC	PPIP5K1	3.16577	2.245	1.32364	0.24994	1
HGLibA_05111	TTGAGCCAGAGCCCCGCCTT	C10orf99	3.16567	2.00945	1.28021	0.257859	1
HGLibB_53333	ACAGAGTCATAGCAAACTTC	USP53	3.16551	2.57057	1.40356	0.236129	0.983109
HGLibB_04904	GCTGCAGAAAAGCTAACCTG	BTBD18	3.16348	2.6384	1.42291	0.232924	0.975076
HGLibB_17275	TCCATCATGAGCATCATAAG	FERMT2	3.16201	1.10763	1.18621	0.276095	1
HGLibA_20190	TTTAGCGGGTAAGCTGCAAG	GPX8	3.16148	2.20482	1.31123	0.252172	1
HGLibA_10860	TCGTTGGTGGTGTTCAGTTG	COX7A2	3.16082	3.28293	1.63796	0.200606	0.896049
HGLibB_30965	CCACACAAGTTTACAGTTTC	NAAA	3.16082	5.092	2.18847	0.139047	0.725651
HGLibB_31192	TCGGGCAAGCTGAGGAGCTC	NBPF3	3.15975	3.27174	1.65175	0.198721	0.891219
HGLibB_28022	ATCCGCAGAGGACAGTCATC	MAN1B1	3.15872	1.87449	1.25444	0.262707	1
HGLibA_34734	GTAGAGGTAGTAGATCCCGT	OTOP1	3.15852	1.56503	1.2169	0.269969	1
HGLibA_53313	AGCTCACTTAATGACGTATC	USP26	3.15813	2.53215	1.38614	0.239058	0.990306
HGLibB_28992	AATTGGATATCATTCTTGCG	MEX3C	3.15695	4.05203	1.98766	0.158585	0.783185
HGLibB_49582	ACCTAGCATCCTGAGATACC	TLR10	3.15607	2.82309	1.47662	0.224304	0.954753
HGLibA_25056	GACGAGAAGTTCTCGTCCAC	KLF15	3.15522	3.87836	1.91184	0.166759	0.806577
HGLibA_09868	GCTCTCGTTTCTGACCTATG	CLDN17	3.15391	2.87508	1.49437	0.22154	0.947956
HGLibA_08625	ACCCCTAAGACTGGACGGTA	CDCP2	3.15168	2.08578	1.28222	0.257486	1
HGLibB_42221	CCGCTGAGTTGTTAACAGCA	RRP1B	3.15138	2.57816	1.39495	0.23757	0.986726
HGLibB_45396	AAGAAAACAAGATACTGCAA	SLCO1B1	3.15092	1.80719	1.23861	0.265739	1
HGLibB_00332	GACGCGTCCGACCTCGCCAT	ABT1	3.15089	2.97154	1.52186	0.217338	0.937917
HGLibB_11742	CACAAGGAGGCGCTCGAGCG	CTXN1	3.15049	2.02231	1.27168	0.259452	1
HGLibA_28878	CTACATGCTCTCCCCGTGAC	MEIS3	3.15003	2.6049	1.40208	0.236376	0.98376
HGLibA_48182	ACTGGGCTAACCTAAAGCTG	TADA1	3.14936	3.67686	1.81778	0.177578	0.836309
HGLibB_54581	AGAAGATGTATTTGTACATC	YBX3	3.14777	3.7155	1.83058	0.176059	0.832153
HGLibA_16420	CAACCAGCTAGCTACTCGAG	FAM204A	3.14735	1.85146	1.24329	0.264839	1
HGLibA_44972	GCTAGCCAGCACGCCGAAGA	SLC35C1	3.14637	4.48471	2.10798	0.146533	0.748515
HGLibB_02673	CATTGCTAGTGTGAACACTT	ARFIP1	3.1446	2.74565	1.44246	0.229742	0.967083
HGLibA_39975	ATAGATCACCTCCACGAGAC	RAB6C	3.14348	2.43637	1.35184	0.244957	1
HGLibA_63397	GGGGCGGCTTGTGGAGTGTA	hsa-mir-6805	3.14194	1.32621	1.18537	0.276266	1
HGLibB_41913	GCCAAACGTACCAAGAAAGT	RPL37A	3.14179	2.65333	1.4105	0.234973	0.980039
HGLibB_49863	GCAGAGCTCCCCGTACTCAG	TMEM129	3.14072	3.58885	1.77103	0.183254	0.850842
HGLibB_00887	GCTTGCTTCGTGGACCAGCA	ADCK1	3.13878	4.90899	2.15297	0.142295	0.735743
HGLibA_63783	CGGGATGCACCTGCTGGGAC	hsa-mir-7106	3.1384	1.00853	1.16976	0.279451	1
HGLibA_50791	GGGCCTGCAGGAAGCGAATT	TNFRSF8	3.13821	-0.289715	1.16662	0.280098	1
HGLibA_27471	GATGCGTTAGGTTGTATTCA	LRRN1	3.13704	2.81982	1.46173	0.226656	0.959862
HGLibA_46939	GTGCAGTGTATGCTGATGAC	SRD5A1	3.13682	0.436441	1.15789	0.281903	1
HGLibB_02583	CATGTCCCCCGAGACGGGTG	AQP11	3.13665	2.03497	1.26393	0.260908	1
HGLibA_57312	GGGCGGGGGCAGGTGTGTGG	hsa-mir-1228	3.13541	1.21424	1.17485	0.278408	1
HGLibB_34514	ATCCCATGATCTACAGTCTG	OR8U8	3.13519	1.68239	1.21426	0.270491	1
HGLibB_50767	ACAGGGCATGTTTGCGCAGC	TNFSF9	3.13469	4.11326	1.98472	0.158894	0.783821
HGLibA_33442	GCACACGGCCGAGTAGAGCG	OPRD1	3.1345	2.58264	1.38362	0.239486	0.991039
HGLibA_33873	CATGCTTCTCGCCCCCATCA	OR2T3	3.13429	4.09493	1.97748	0.159656	0.786274
HGLibB_00897	GGACATTCGCAGGGCACGGG	ADCK4	3.13411	2.0724	1.26794	0.260153	1
HGLibB_32030	CAATATTCTCGCTCACCCAG	NLGN3	3.13381	3.19946	1.59938	0.205991	0.910265
HGLibB_26565	AAAATGCTCCCACGAGCGAT	LIPC	3.1338	1.59689	1.20371	0.272581	1
HGLibA_37454	TTCCAAGGACCGTGGCCGCT	PODN	3.12984	2.11697	1.27172	0.259445	1
HGLibB_42704	CTGAAGCTTACCTTCAGTCA	SART3	3.12817	-0.384795	1.15991	0.281484	1
HGLibA_43277	AGCATATCGGTATCTCCAAA	SEL1L	3.12795	3.40045	1.67644	0.195398	0.883367
HGLibA_38007	TCAGTACGAGGATGTCGTCC	PPP1CB	3.12684	0.932504	1.15848	0.281781	1
HGLibB_14806	TGAAGAGTCACAGTTTGAGA	EIF4EBP1	3.12456	0.789512	1.15504	0.282496	1
HGLibA_21388	CAACTACTCCGAACGAGTCG	HIST1H2AE	3.12265	1.66847	1.20395	0.272535	1
HGLibB_15320	CTCAGGCCCCCCTCCCGAGG	EPN1	3.12235	5.42531	2.1511	0.142468	0.73624
HGLibA_48753	GCTCTGGCGAGATGGCGGCA	TCEB3CL2	3.12156	1.8638	1.22737	0.267918	1
HGLibB_32239	AGGCGGGGGGACTGAACTGT	NOLC1	3.1201	0.176148	1.14709	0.284159	1
HGLibA_18683	GATCCCGCCTCCTATATCAT	GATAD1	3.11849	1.41408	1.17477	0.278424	1
HGLibB_37430	GTAGAACTCGATCAGCAGAA	POGZ	3.11767	2.54889	1.359	0.243711	0.998979
HGLibA_04017	GCACTCACATGGGGGTACAG	B4GALNT3	3.11622	2.45418	1.33568	0.247798	1
HGLibB_31504	GCAGATCACATTCACCTCCC	NDUFS1	3.11613	1.32193	1.16883	0.279642	1
HGLibB_37682	AGAAGTAGTAAAACTCCTGC	POTEF	3.11584	0.32573	1.1428	0.285062	1
HGLibA_48242	TTGATCGGACGTACCCGCTG	TAF5L	3.1155	-0.191898	1.14932	0.283691	1
HGLibA_13962	CCGTCATGATCTCCATCGTC	DRD2	3.11305	3.17854	1.57183	0.209942	0.920182
HGLibB_50908	GCTACATTGAATGTGGGATC	TOMM40L	3.11277	1.76876	1.20807	0.271715	1
HGLibA_63950	TGCAGCAGCAGCGGCGGGGT	hsa-mir-7704	3.11204	1.84175	1.2177	0.269813	1
HGLibB_30699	CATCCAGTATCTGGCGTACG	MYH9	3.11202	4.05427	1.93884	0.163795	0.798246
HGLibB_10292	TGGACACCAGGAGCTTGTGT	CNKSR3	3.11183	1.93115	1.23077	0.267257	1
HGLibA_43688	CCCTTCGGGAAGACGATAAC	SF1	3.11099	0.616365	1.1436	0.284893	1
HGLibB_47775	GCAGCCCTCACCTGGGCGCG	SURF1	3.11042	1.14633	1.15515	0.282473	1
HGLibA_55855	CCCTTTGCCTGTAACGACTG	ZNF35	3.10866	0.667363	1.14353	0.284908	1
HGLibA_12481	GGGGTATATCTTCAGGTTCG	DCDC1	3.10798	1.37411	1.16589	0.280247	1
HGLibB_23020	TTTAATAATGTAATACCCGA	IL1RAP	3.10777	1.81802	1.2112	0.271094	1
HGLibA_02025	CATCGATGATCTCCCGCCGC	ANKRD2	3.10756	2.48458	1.33632	0.247685	1
HGLibA_56024	CACCAGGTCACTCACTTTAG	ZNF449	3.10731	4.69161	2.10321	0.14699	0.749971
HGLibB_27646	ACCTGAGGAATAGTAAATTC	LY86	3.10717	2.31256	1.29687	0.254786	1
HGLibB_48363	CTATCGCCAGTGACATTCCA	TAS2R60	3.10511	4.42924	2.05129	0.152078	0.764574
HGLibA_05799	AACTCTCGTCTGCTCATTGA	C1orf174	3.10494	2.12319	1.25525	0.262553	1
HGLibA_23897	GACAACCTGCTGTCGGGGAG	IZUMO3	3.10286	2.42758	1.31946	0.250689	1
HGLibA_58322	CGTGTCATCCCCAGATACAA	hsa-mir-2355	3.10257	2.8817	1.45468	0.227778	0.962408
HGLibA_45091	TTCCTACAGCTAATGCAACA	SLC39A10	3.10172	3.88791	1.85999	0.172626	0.821843
HGLibA_44816	GGACCGGCGCAGCAATCAAG	SLC27A2	3.10121	2.81343	1.43017	0.231737	0.972214
HGLibB_08886	GGGTTCAGGCAATGCAAATA	CDV3	3.09985	2.18814	1.26377	0.260939	1
HGLibB_27248	GCGGTTGCGCGTCGTCCCGC	LRRC24	3.09971	1.60262	1.18191	0.276968	1
HGLibB_11652	TGTTCCTCCTGTCGTAAAGC	CTNS	3.09949	2.17517	1.26071	0.261517	1
HGLibB_52629	TCCTGGGGCTGATGCCGCTA	UBE4B	3.09911	2.62084	1.36786	0.24218	0.996118
HGLibA_37079	TTGACGGGCTCCCCGGTGCG	PLEKHA7	3.09905	2.62915	1.37009	0.241796	0.995301
HGLibA_03811	GAGGCCAAAGGCAGTTGTAT	ATR	3.09799	2.44658	1.31979	0.250629	1
HGLibB_00232	ATTCTTGTTGGATCTAGCCT	ABHD10	3.09783	1.74604	1.19573	0.274177	1
HGLibB_31434	TCAATCTTATTGGACGAGAC	NDUFA9	3.09738	2.79614	1.42206	0.233064	0.975523
HGLibB_06058	GGGGCAAACGCGGAGCACGG	C22orf26	3.0971	3.46429	1.67474	0.195625	0.884001
HGLibA_29123	GACCATTCCACTTATAACGA	MGA	3.09659	3.44193	1.66323	0.197168	0.887805
HGLibA_37718	CTGACAGGCCGTACAATGCC	POTEB	3.0959	0.582873	1.13396	0.286932	1
HGLibA_02658	CGACCGCGACCGCATCGATG	ARF6	3.0956	2.00002	1.23013	0.267381	1
HGLibA_65120	ATTTAGTAATGCACACCCAG	NonTargetingControlGuideForHuman_0737	3.09552	0.416053	1.13095	0.287572	1
HGLibB_41628	TCTCCGATGCCATGAGAGCC	RNF40	3.0953	3.24169	1.58206	0.208464	0.916595
HGLibB_22939	GAGCGGATTCTGCCCGCACA	IL13	3.09519	2.01177	1.23161	0.267093	1
HGLibA_00063	AAAGTCCCACCGGAACTTCT	AAR2	3.09519	2.77253	1.41254	0.234636	0.979305
HGLibB_18661	TTCTGAGTGCCCCGAACAAG	GATAD2A	3.09512	1.37981	1.15781	0.281921	1
HGLibA_37962	TGCCAAGTGGACTTGAATCG	PPM1A	3.09482	1.77939	1.197	0.273923	1
HGLibA_49979	GGTGTTCCGTCTTTGATTGC	TMEM14A	3.09441	1.57526	1.17566	0.278242	1
HGLibB_29140	GTATCCTATCATGTACAGCA	MGST3	3.09426	3.29923	1.6033	0.205437	0.909314
HGLibA_46003	CATTAGTATCAGATCTGCCG	SNTB2	3.09302	0.0133988	1.13222	0.287303	1
HGLibA_46477	GTAATACGAAGAAGAACCCC	SPATA31A4	3.09277	1.61366	1.17856	0.27765	1
HGLibA_53298	GGTGACCCCACACGACTGAC	USP20	3.09208	1.90228	1.21324	0.270692	1
HGLibB_22077	CCGGCGCGCTCCCCACCTAC	HRK	3.09173	1.90054	1.21256	0.270826	1
HGLibA_25730	CCAGCGGCTGTCGTCCACTG	KRTAP26-1	3.09152	1.88514	1.21008	0.271317	1
HGLibA_27715	GGCGGGGACTCTACAGTCGG	LYPD2	3.0914	0.952315	1.13646	0.286402	1
HGLibA_47008	CTTGTGTGAGAGCAATCGCG	SRP68	3.09137	2.55929	1.34385	0.246356	1
HGLibB_45576	ACCAGACCATTGCTCGCAAG	SMARCD2	3.09087	3.75934	1.79404	0.180435	0.843493
HGLibB_07644	ACTCTTCATAATATAATAAA	CCDC152	3.09073	0.261183	1.12715	0.288383	1
HGLibA_27289	GTCTCGGCGGATGTCGTGCC	LRRC25	3.08902	1.77929	1.19299	0.274727	1
HGLibB_46366	AGGGTACTCCGAAAACAAAT	SPAST	3.08813	2.96852	1.47346	0.224801	0.955852
HGLibB_43293	TGGCTCACCGTTGAGCCAAA	SEMA4C	3.08731	1.91662	1.21192	0.270953	1
HGLibB_13333	GTGTCAGACAAAGAGAAAAA	DLGAP5	3.08679	1.03571	1.13436	0.286848	1
HGLibA_28705	GTGATGGAACTGTACGAGAT	MDP1	3.08586	1.15633	1.13965	0.285727	1
HGLibA_42023	ACCCTGTTAGGATCCTATAA	RPP14	3.08549	1.69186	1.18174	0.277002	1
HGLibB_04308	ACCAGGCTCTAAACCATAGC	BCL2L12	3.08512	3.26718	1.58323	0.208296	0.916119
HGLibA_39498	CACTCCGAAGTCGGGCCAGC	PTPRE	3.08504	2.26435	1.27018	0.259734	1
HGLibB_41478	CCTGGGTCACTCGAGGCAAC	RNF144B	3.08354	1.79515	1.19134	0.275058	1
HGLibA_22255	CGGATGATGAAGTAGTACAG	HSP90B1	3.08294	0.703123	1.12708	0.2884	1
HGLibB_45320	CATTTAGCTGCTATCACCAG	SLC7A6	3.08224	3.88119	1.83832	0.175148	0.829719
HGLibA_46232	GGGAGCGAGCCTCTACGACG	SOX11	3.08125	-0.231057	1.12976	0.287827	1
HGLibA_29011	AATTACTGTATCGAATGACT	METTL5	3.08104	2.78013	1.40149	0.236474	0.983905
HGLibB_07361	AAAACTGAAACATATATAAG	CATSPERB	3.08026	0.187445	1.12162	0.289569	1
HGLibA_58012	TGTTGCAGCCGGAGGGACGC	hsa-mir-187	3.07923	3.98002	1.87945	0.170396	0.81609
HGLibB_46996	GGGGTCGCTCTCCTTGCTAG	SRRM5	3.07893	3.75722	1.78125	0.181996	0.847509
HGLibA_10140	CCCGCTCTGAGTAGTTGTCA	CLSTN3	3.07886	2.86122	1.42851	0.232008	0.972917
HGLibB_54710	CCCAGTAAAACTTCGCCACG	ZAR1	3.07735	1.75016	1.18237	0.276874	1
HGLibB_37555	CCTGTACGCTGCTTCACTTG	POLR2L	3.07729	1.74375	1.18176	0.276998	1
HGLibB_39443	GCCTCTACAGTGCGGTGACA	PTPRCAP	3.07716	1.38365	1.14644	0.284295	1
HGLibB_50149	TGGTACTCTTCGTAGTGTGG	TMEM212	3.07685	1.91965	1.20525	0.272275	1
HGLibA_51528	TACAGAAAATGCAGTCTTTG	TRIM49C	3.07655	1.45465	1.15124	0.28329	1
HGLibA_35412	GGTACAGACCTATCGCTTAC	PCDH20	3.07653	1.33914	1.1435	0.284913	1
HGLibA_31401	AACATGAGCACCGCTTATGT	NDNF	3.07446	3.97747	1.87372	0.17105	0.817796
HGLibA_43416	CAATGCCAACGATCCACGCT	SEPHS2	3.07402	2.00646	1.21637	0.270074	1
HGLibA_07058	GGAGCTCTTTGACCGTATTG	CAMK1	3.074	2.89991	1.43377	0.231149	0.970756
HGLibA_12826	TTGAATTTAGGGTGCCAGGC	DEFB105A	3.074	2.42273	1.29734	0.2547	1
HGLibB_25142	TACTTCTGTGCGATGTTCAC	KLHL3	3.07322	3.67417	1.74001	0.187137	0.861076
HGLibB_09468	CACTCGACAGCTCATCTGTT	CHMP2A	3.07269	2.87693	1.42917	0.2319	0.972642
HGLibA_53666	GGAGACCCAAAGGGGAGTAT	VIPAS39	3.07162	0.179544	1.11688	0.290591	1
HGLibB_14771	AACAATTAGCAGATAAACTG	EIF3J	3.06993	1.42398	1.14402	0.284803	1
HGLibA_59477	GAGGTTGCCCTTTGTATATT	hsa-mir-381	3.0699	1.26018	1.13591	0.286518	1
HGLibA_20988	CTGAGCTAGCCAACCGCACA	HCRTR1	3.06913	-0.450307	1.1226	0.289359	1
HGLibA_63376	GAATCATGGCGAGAACCTGT	hsa-mir-6800	3.06906	3.83166	1.8032	0.179326	0.840275
HGLibA_49054	AGCTGTGGACTATCTGGCAC	TEX12	3.0686	2.78024	1.39406	0.237721	0.987058
HGLibB_23167	TCTTGTTTGCATGGTGGTAT	IL9	3.06851	2.62785	1.34666	0.245863	1
HGLibB_31786	GTAGATGCCCGCATGCTGAA	NFKBIE	3.06827	2.40319	1.28879	0.25627	1
HGLibA_62026	GGTTGGTGCAATAATATTTG	hsa-mir-548i-4	3.06775	1.9515	1.20373	0.272577	1
HGLibB_23034	GGACAACCCGCAGAGCAGCA	IL1RL2	3.06768	2.36196	1.27925	0.258038	1
HGLibB_19786	GGTTCCTTACCTTCCCATAG	GPKOW	3.06762	1.01952	1.12251	0.289379	1
HGLibA_19510	AACTATATTGAAGAACGTTC	GNG11	3.06702	1.37024	1.13897	0.285871	1
HGLibA_09538	CGTGAACTGCATCTGCTCAG	CHRDL1	3.06675	4.9322	2.07008	0.150214	0.7595
HGLibB_49739	ACTGGACGTGGACTTCACGC	TMED1	3.06617	1.67874	1.16761	0.279893	1
HGLibB_43573	AGACTGGAGGTATTGCTGAG	SESN3	3.06447	1.1945	1.1279	0.288223	1
HGLibA_13113	CAGTGGTGGAACACAGGTTA	DHODH	3.06366	1.53438	1.15114	0.28331	1
HGLibA_59903	ACAGTTTGGTTTCTGAGGCA	hsa-mir-4298	3.06355	0.723648	1.11586	0.290811	1
HGLibA_21556	AGTCAAGTACTCGAGCACCG	HIST3H2A	3.06254	1.19289	1.12682	0.288455	1
HGLibA_31470	CATCATCATGTCGTCGCAGA	NDUFA7	3.06253	3.00971	1.46679	0.225853	0.95807
HGLibB_30430	AAATTGACCTGCCCGTGAAG	MTRNR2L1	3.06219	2.02855	1.21138	0.27106	1
HGLibB_15691	CAGACTTCTTTAAGCAGTGT	EWSR1	3.0616	3.44965	1.63457	0.201072	0.897339
HGLibB_32883	GTTGATCTTGTCAATGTCGA	NUDCD3	3.06045	2.58609	1.32814	0.249136	1
HGLibA_62782	CGGCTGCGGCGACGCCGCCT	hsa-mir-636	3.05872	3.19272	1.53079	0.215994	0.93499
HGLibB_15916	ACACGTGGTTGGTCTTGAAC	FADS2	3.058	1.55417	1.14949	0.283656	1
HGLibB_21135	AGCTGGAGGGTATGGTCAGT	HERC4	3.05781	1.79873	1.17486	0.278405	1
HGLibA_17189	GCTTCTGCAGACAGTCAAGC	FCGR2A	3.05643	2.40924	1.28107	0.2577	1
HGLibB_36454	TCCCCTGCTGCAATGAACAC	PI4KB	3.05384	2.76083	1.37626	0.24074	0.993894
HGLibA_63519	GCACAGGTCCTGCGGGGCCG	hsa-mir-6836	3.05288	1.97361	1.19707	0.273908	1
HGLibB_54714	AAAGCTGTAAATATTGCCAC	ZAR1L	3.05119	0.67762	1.10668	0.292804	1
HGLibB_18304	TCCGGCAAGTACACCCAGCA	GAB4	3.05109	0.105109	1.10491	0.293191	1
HGLibB_41972	AAGGCCTCGCGGTCCTTCAC	RPP21	3.05096	2.1256	1.21781	0.269791	1
HGLibB_02760	TGGGCGCAGTCAGCCAGCCG	ARHGAP33	3.05007	1.36883	1.12817	0.288166	1
HGLibB_10905	TCTTACCAGCGGGAACGCCA	CPEB1	3.04947	0.978705	1.1103	0.292017	1
HGLibB_28416	CCTTGTACCCAAGCATGCAA	MB21D1	3.04946	3.06778	1.47626	0.224361	0.954818
HGLibB_47105	AGCGTCAGAAGTGGTGTAGT	SSR4	3.04901	1.49288	1.13755	0.286171	1
HGLibA_41844	GTGAACCGCTGCATACTGTG	RPH3A	3.04854	3.34628	1.58163	0.208526	0.916768
HGLibB_19977	CTACTCGGGGTTGGACGGCC	GPR25	3.04824	4.08758	1.87436	0.170977	0.817718
HGLibB_41329	CGGCATGGATCAGTGCGTGA	RMND5A	3.04721	1.62435	1.1496	0.283633	1
HGLibA_25670	GGCTTCGGAGGCTACGGATA	KRTAP19-3	3.0472	1.79307	1.16691	0.280037	1
HGLibA_00845	GACGTAGCAGCATTAAACAG	ADAMTS9	3.04575	3.9834	1.84604	0.174245	0.826601
HGLibB_26111	AGGACACTTAGGAGTACACT	LCE5A	3.04574	1.85145	1.17432	0.278515	1
HGLibB_47909	GATCCCAAGAGATCTATTTG	SYNCRIP	3.0454	3.61511	1.69039	0.19355	0.877788
HGLibB_32147	TCTCCTGTCAACGACACCTA	NMNAT3	3.04505	2.71377	1.35442	0.244507	1
HGLibB_02439	GGCTACGCAGGCCATCCCCA	APLP1	3.04426	2.62519	1.3275	0.24925	1
HGLibA_12288	GCGTGCAGTTATGTCGGCGT	DAD1	3.04323	2.82462	1.38845	0.238667	0.9892
HGLibA_41518	ATCCGGGTAGGAGTTGAAGA	RNF139	3.0422	1.9441	1.18556	0.276227	1
HGLibA_12119	TGTAAGCACCCCCTGGATCC	CYP2C19	3.04038	2.51249	1.29285	0.255523	1
HGLibB_33963	ACATAATTGTAGTGTAGTGT	OR4F4	3.03907	3.55891	1.66036	0.197554	0.888704
HGLibA_54724	AGATGGAGAACTTAATGTTC	YTHDC1	3.03865	2.18841	1.22085	0.269194	1
HGLibB_48486	TCATTTGACAGCAAATTCGG	TBC1D3C	3.03857	1.16651	1.11006	0.292068	1
HGLibB_43459	ACTGAAAGGGTGCTTCCACT	SERPINA11	3.03742	2.88922	1.40484	0.235915	0.982533
HGLibB_55311	CATGTCAGAGCGAGACCTGC	ZMAT5	3.03726	2.88401	1.40298	0.236225	0.983391
HGLibA_38487	GCCGACACGTCTGCCAGTGC	PRIMA1	3.0369	4.03599	1.85361	0.173364	0.823798
HGLibB_07014	ACACGAAGCACTTCCCGTCA	CALHM3	3.03617	6.0506	2.04954	0.152252	0.765126
HGLibA_52580	CGCTAGTGGCGGCTGGGTCG	UBE2C	3.03463	1.14395	1.10633	0.292881	1
HGLibB_44211	AAATCCAGTTACACTCTTAA	SKA2	3.03216	2.18434	1.21522	0.2703	1
HGLibB_22947	ACTTATTGGATATCACCACA	IL13RA2	3.03179	0.193807	1.09244	0.295932	1
HGLibB_24356	GGAGATAGCGATAAGCTTAG	KCNS3	3.03132	1.79445	1.15652	0.282188	1
HGLibA_35920	TGAAGCCGATAATACAAAGA	PDLIM5	3.03017	1.28018	1.1107	0.29193	1
HGLibA_47140	ATGGTGCGCCAACCATTCGT	SSMEM1	3.02998	3.24525	1.52589	0.216731	0.936344
HGLibA_56278	TATCCGATGAAAAGTAGAAG	ZNF571	3.02965	1.98033	1.18234	0.27688	1
HGLibB_39922	CCCGGATGTAGCTGGGGATC	RAB6B	3.02942	1.60695	1.13612	0.286473	1
HGLibA_05637	GCCGGGCGTCCACACCCGAC	C19orf21	3.02887	2.64362	1.32127	0.250364	1
HGLibA_30537	GTCGAACAGCCCGCTGCAGC	MUC20	3.02818	0.476743	1.08966	0.296545	1
HGLibA_50712	GTGAACGTTGCCACAACGCC	TNFAIP3	3.02784	2.46018	1.272	0.259393	1
HGLibA_05152	GACAGAGCGCCATGGGAAAC	C11orf52	3.02772	1.39145	1.11497	0.291004	1
HGLibB_48001	CTGTATTCTGAACCAAGATC	SYT14	3.0275	1.03411	1.09708	0.294907	1
HGLibA_05811	TGCATCCTTAGGGTGGCATA	C1orf189	3.0259	3.84323	1.764	0.184126	0.853067
HGLibA_61660	AACAAAGCGCTCCCCTTTAG	hsa-mir-518b	3.02573	3.84697	1.76526	0.183969	0.852674
HGLibB_36649	GGACAACTGGATTGCCCATC	PINX1	3.02568	3.47771	1.61374	0.203966	0.905103
HGLibB_06389	AATAATGAAGAAAAAGAAAA	C5orf47	3.02544	-0.171891	1.0913	0.296183	1
HGLibA_13808	AAGTATCGGGCGGAAGGGCT	DPAGT1	3.02394	1.6397	1.13597	0.286505	1
HGLibB_40368	AATTCACCTCCCATTATCCA	RBAK	3.02364	-0.338435	1.09317	0.295771	1
HGLibB_46707	TGTTTGCGAGTAAACCCCAA	SPOP	3.02332	0.71993	1.09035	0.296393	1
HGLibA_39804	GGTCAAACATACTGGCGCTC	RAB11FIP5	3.02304	2.71226	1.3363	0.247687	1
HGLibA_46505	TCGGGACCTGAACTACCTTC	SPATA31E1	3.0224	3.82409	1.75264	0.185546	0.856998
HGLibA_01123	ACAACCTTCAGACGACTCGT	AFMID	3.02223	0.916471	1.09176	0.296081	1
HGLibA_02737	AGTCCTGTCCCATGCGATTC	ARHGAP25	3.02184	5.21357	2.02999	0.154222	0.771068
HGLibB_08532	ACAGCCTGAGACAGTTCTTA	CDC27	3.02036	2.59659	1.30128	0.25398	1
HGLibB_11187	GAAATGATCATGTAAGTAAG	CRLS1	3.02035	0.740837	1.08843	0.296818	1
HGLibA_52967	TCTTGTGAGTGTGAAGCCGA	ULBP3	3.01815	1.69868	1.13796	0.286084	1
HGLibA_20082	CTGGGGTCCGGACTGCGAGA	GPR75-ASB3	3.01808	2.89751	1.39215	0.238042	0.987785
HGLibA_11157	CTCTCTTCAGGGGTGAACAT	CRIP3	3.01796	2.15769	1.19984	0.273354	1
HGLibB_16614	GTTGCTGACGTGGCGGGCGA	FAM53B	3.01792	1.61823	1.12987	0.287802	1
HGLibB_10277	TGACACTGACCTTCCTCAGG	CNIH2	3.01783	3.95802	1.80543	0.179057	0.839698
HGLibB_27151	GGAACCCGGTGGGCAATACA	LRIT3	3.01782	2.62409	1.30731	0.252882	1
HGLibA_47466	TAGGGCATGCGTGTGAACTT	STK17B	3.0175	1.22117	1.09944	0.294389	1
HGLibB_11307	ATGGTGAATCGCTTTCAGAG	CSE1L	3.01748	2.02072	1.17966	0.277426	1
HGLibB_42610	GCAGCAGGTGCTCCGCCTGC	SAMD10	3.01747	3.91897	1.78733	0.181251	0.845712
HGLibA_11434	TGATGCCCAGCCTCTCGCCA	CSRP2	3.01722	2.33677	1.23756	0.265942	1
HGLibA_40273	GTCCGTACTCCACCCCGCTC	RARA	3.01679	5.71027	2.03112	0.154107	0.77094
HGLibB_54269	GAAAATTAACAAAGTCTGAG	WNK1	3.01672	2.47705	1.26758	0.260221	1
HGLibB_13123	TCCATTAGGCTTCCAAAGAA	DHRS4L2	3.01642	5.91027	2.0282	0.154404	0.771565
HGLibA_08739	CCTTCTCGGATAGCTGTAAA	CDK15	3.01503	1.76923	1.14311	0.284997	1
HGLibA_43149	TCTGTTGCTTCGAACTCCAG	SDHD	3.0143	2.69601	1.32535	0.249634	1
HGLibA_04692	CCAACAAGTGCCCCAAGATA	BOLL	3.01361	2.56131	1.28621	0.256747	1
HGLibB_23624	TGTCGTACAGCACAGCACCG	ISG20	3.01345	3.51043	1.61572	0.203689	0.904441
HGLibA_65318	AGGGTCAGTCTGTCCTTTTT	NonTargetingControlGuideForHuman_0935	3.01328	0.985052	1.08734	0.297062	1
HGLibA_26602	AATCTTGTGCGTTCCACCGA	LIPC	3.01312	5.58113	2.02839	0.154384	0.771565
HGLibA_04209	GAGCTGTAAGTTACCGAATA	BBS10	3.01241	3.4762	1.601	0.205762	0.90975
HGLibB_30340	TCGATGAGATATTGTAACAG	MTHFD2	3.01232	1.74309	1.13864	0.28594	1
HGLibA_00383	AAATGCCGACAACGAAGGCG	ACAP1	3.01169	2.20701	1.20606	0.272113	1
HGLibA_06548	TACAATCCGAGACTAAAACG	C7orf49	3.01072	0.815049	1.08331	0.297958	1
HGLibA_27877	CGAGAACGCCGCCATGCGCC	MAFF	3.00989	1.68708	1.13153	0.28745	1
HGLibB_11992	AGGTAACTATGTCCAGCTCT	CYB5R2	3.00917	2.03766	1.17646	0.278078	1
HGLibB_49438	GGATGACGGACAAGTGTTTC	TIMM13	3.00725	3.6482	1.66672	0.196698	0.886722
HGLibA_45945	GAGATACGTGCAGCTCAAGC	SNRNP25	3.00698	4.62066	1.97396	0.160029	0.787247
HGLibB_24831	AGGGAAGACATTTACTATGA	KIF15	3.00694	2.01583	1.1719	0.27901	1
HGLibA_50366	GATGTCGATTGCCTTCACGT	TMEM31	3.00689	1.17327	1.09044	0.296375	1
HGLibA_04723	CGAAACCAGCAATGAATTTC	BPIFB2	3.00562	4.03048	1.81887	0.177448	0.836019
HGLibA_17656	AATCGTGGGAAGTTTCGATG	FLRT2	3.00536	1.38982	1.1003	0.294201	1
HGLibA_03438	GGTGTCCATCACAAAAGCCG	ATF3	3.00482	1.27788	1.09478	0.295414	1
HGLibA_07788	TGCCACCCTAATTGAGAAGC	CCDC43	3.00478	1.88534	1.15183	0.283166	1
HGLibA_02832	GAGCAAGAAGATCCACTTTG	ARHGEF19	3.00383	5.30883	2.00112	0.157183	0.779254
HGLibA_54756	GATGTAGAGGGTGTCGCCCG	YY1	3.00287	2.79981	1.34875	0.245497	1
HGLibB_18353	TAATCTACAATAGAGAACTG	GABRB2	3.00169	0.488933	1.07272	0.300332	1
HGLibB_53051	GGACTAACCTCAAGGTCCTG	UQCRC2	3.00065	2.30672	1.21923	0.269512	1
HGLibB_46016	ATGGATAAAGCTCTGAAAGA	SNX25	2.99991	5.84602	2.00966	0.1563	0.776827
HGLibA_63775	GAAGAAGATTAGAGTGGCTG	hsa-mir-7-3	2.99954	1.24512	1.08957	0.296566	1
HGLibA_02207	CTTACCTACCTCAATCTGAG	ANP32E	2.99753	1.23825	1.08767	0.296988	1
HGLibB_55326	GGTGATAAAGAGTCCACCCC	ZMYM2	2.99742	0.707234	1.07379	0.300091	1
HGLibA_10488	CTTGTGACACTTGTAGTAGT	COG7	2.99728	3.70889	1.68084	0.194813	0.881476
HGLibA_02631	GTACTATGGTGTCCAACCTG	ARAP3	2.99696	3.94681	1.7787	0.182309	0.848343
HGLibB_52535	TCCCGCTTTGACTATTTCAA	UBE2E3	2.99637	1.29322	1.08972	0.296534	1
HGLibB_47825	CAAGGACTGCTGTGACCGAA	SVEP1	2.99559	1.76977	1.13015	0.287743	1
HGLibA_56124	GAACTCTGTGAACCGACGTC	ZNF510	2.99485	0.0259552	1.06958	0.301041	1
HGLibA_33073	TAACATCAGACAACGTAATC	NUP88	2.99374	1.10963	1.0791	0.2989	1
HGLibA_19807	CAGCAAAGCGGCGGCGCAAG	GPI	2.99374	1.77934	1.12998	0.287781	1
HGLibB_30975	CACGTTCTCACCTGATGAGT	NAB1	2.99298	1.96064	1.15462	0.282585	1
HGLibA_20726	AAACGTGATGTCCGCCATAC	GZMK	2.99186	3.02973	1.41512	0.234208	0.978185
HGLibA_03415	GCGACATCGCCATAATGACA	ATAD3C	2.99077	1.79771	1.13035	0.2877	1
HGLibA_33280	TGTGATAGAAAAAACCGAAT	ODF2L	2.99059	1.87258	1.1407	0.285504	1
HGLibB_06143	GCTGCAAAAGCAGTAGCCGC	C2orf53	2.98945	1.51764	1.10164	0.293906	1
HGLibB_42647	GGCTAGCTCTAGGGATATCC	SAMD9L	2.98842	1.48705	1.0979	0.294728	1
HGLibB_51358	ACCTTCGGGAGCAGATCACC	TRIM17	2.98719	1.46435	1.09457	0.295462	1
HGLibA_14849	TACTGCACCATCGTATGTCA	EIF4H	2.98689	2.80055	1.33663	0.247628	1
HGLibA_43322	ACTCACGGAGCTGATCGAAG	SEMA3B	2.98675	3.04994	1.41796	0.233739	0.977108
HGLibA_58663	ACAACCTTTGGGGTGATGGG	hsa-mir-3151	2.98547	0.799775	1.06828	0.301335	1
HGLibA_51090	CGCCGGGAGGTGGATTCGTG	TP53TG5	2.98517	1.76264	1.12264	0.28935	1
HGLibA_19063	TGACTACCGTTATGGGCGAG	GIGYF1	2.9847	2.01616	1.15663	0.282166	1
HGLibB_00612	TGAGCACGCACCTGGTGGCG	ACTG2	2.98393	1.61754	1.1076	0.292604	1
HGLibB_33843	GGAGCATGAGGACACAGCAT	OR2T5	2.98371	2.37253	1.22116	0.269134	1
HGLibA_42604	AGCGCGGCTTGCGACGCGCC	S1PR5	2.98351	1.68238	1.11399	0.291216	1
HGLibB_56991	GCTGAGGGAGCTCACTGATG	ZSWIM8	2.98293	3.39669	1.53972	0.21466	0.93167
HGLibA_16113	TTTGTCCGGCGGCCGGACGA	FAM132A	2.98232	2.75093	1.31762	0.25102	1
HGLibB_31802	AGATTTCATCACTGTCACAA	NFU1	2.98196	5.36052	1.98789	0.158562	0.783185
HGLibA_37959	GCCTACGAGCACTTCCACCG	PPL	2.98179	4.90282	1.97013	0.160434	0.788793
HGLibB_34968	TGATTGCCAGGAAATGGATC	PAGE4	2.98112	3.67357	1.65137	0.198772	0.89133
HGLibA_46341	AAAAAATTCTTTGCGTGCTC	SPAG1	2.98052	0.807699	1.06456	0.302177	1
HGLibA_09514	GATCCTGAGACCAATTCCGA	CHORDC1	2.98048	1.9808	1.14912	0.283733	1
HGLibA_61355	ATATGTGATGTCACTCCTAA	hsa-mir-489	2.97971	2.66693	1.29075	0.255911	1
HGLibA_41931	CATTGTAGAGACACCACCCA	RPL3	2.97934	1.65009	1.10776	0.292569	1
HGLibA_26582	CAGGAATACAAGCTCTGCTG	LIN9	2.97854	2.35465	1.21383	0.270575	1
HGLibA_62592	GAGTCCAGAGTCTGGGAAGG	hsa-mir-6083	2.9783	2.87693	1.35358	0.244654	1
HGLibA_02182	GCTGGCGAAGATGGGCGACC	ANO5	2.97811	3.4404	1.55506	0.21239	0.92574
HGLibA_58578	AGCTGACTCTGAGAAGAAGC	hsa-mir-3131	2.97783	2.32738	1.20739	0.271849	1
HGLibB_46881	AAGGAAGCAGAGATGCTAAT	SRCRB4D	2.97781	6.68699	1.96501	0.160979	0.790449
HGLibA_05259	AATAATCCATTGATATTTCG	C12orf50	2.97765	1.61804	1.10357	0.293485	1
HGLibB_54369	CGGGCACAGGAGGCGCATTT	WTIP	2.97715	1.84555	1.12805	0.288192	1
HGLibA_19381	CTGCATATCCTCAATCGCTA	GLYCTK	2.97615	0.878632	1.0625	0.302645	1
HGLibB_32714	TGTACACCTTGTAGACAACC	NSG1	2.97603	3.34159	1.51515	0.218355	0.940374
HGLibB_45921	AAATCTAAGAAAAGGGAAGC	SNRPD1	2.97514	2.43483	1.22798	0.2678	1
HGLibB_25839	CTCCCCTGCAGGACGCTGAA	KXD1	2.97512	3.33751	1.51221	0.218802	0.941376
HGLibA_40203	GGCATGCTCGCCAGCTGACT	RANBP3	2.97482	3.09244	1.42278	0.232946	0.975133
HGLibA_44820	GGCACGTGTCTGTTATGCTC	SLC27A3	2.97444	2.7836	1.32155	0.250315	1
HGLibB_16303	TACCATCTGCAGGTTCCTCC	FAM183A	2.97311	2.1399	1.16627	0.28017	1
HGLibB_37979	GCTGCCATTTAGCTGAAGTG	PPP1R13B	2.97222	2.96031	1.37607	0.240772	0.993918
HGLibA_15762	GCGAGTTCGACAGCTCACTG	EXOC8	2.97146	2.85499	1.34118	0.246826	1
HGLibA_17315	ATACCTGGTCTGCCGTGAAG	FEZ2	2.97141	3.53908	1.58806	0.207603	0.91463
HGLibB_30634	GCGCCGATCCCGAGAGCGTC	MYCL1	2.97118	1.74646	1.11183	0.291684	1
HGLibB_23513	TCGGAGCAGGCGTCGGCGGC	IQSEC3	2.97077	2.74947	1.30805	0.252748	1
HGLibB_14727	ACCAGTTTCTCGAGCACCAG	EIF2D	2.97059	2.6146	1.26916	0.259924	1
HGLibB_49076	CACGATCACCGTGGGGTGGT	TFAP4	2.97048	2.50961	1.24075	0.265326	1
HGLibA_55462	GAACTCTCTGATGACGAACC	ZNF132	2.96816	1.99096	1.14227	0.285174	1
HGLibB_28255	GTTTAATACCACAAAGCATC	MAPK9	2.96667	1.72349	1.1068	0.292779	1
HGLibB_36090	CTTCTTCAGCTCTAGATCCA	PFDN1	2.96583	0.579043	1.05281	0.304861	1
HGLibB_41513	CCAGTGAAGAATACATACAG	RNF168	2.96512	0.651241	1.05321	0.304768	1
HGLibB_49783	ACGGACATCGACTTCTGCTC	TMEM102	2.96471	2.40653	1.21482	0.270379	1
HGLibA_07564	CGGACCACTGACGAGAATGA	CCDC120	2.96453	1.01686	1.05698	0.303905	1
HGLibA_26449	ACACTTCAACCATGCCGACG	LHX2	2.96409	2.2846	1.18887	0.275558	1
HGLibB_32305	GGAAGCCCGTGTGCAAATGG	NOTCH3	2.96348	2.02807	1.14425	0.284757	1
HGLibB_53496	ATTGATCTCGAAGAAAGTCA	VBP1	2.96183	0.00819117	1.04997	0.305514	1
HGLibB_46113	ACGCAGGTCAGGTCAGTCCG	SOLH	2.96139	3.39555	1.52029	0.217575	0.938331
HGLibA_06063	TCAGGTTGGTCTCAAACTCC	C22orf26	2.9613	-0.217189	1.05181	0.305091	1
HGLibA_62157	ATGGTACTCCTTAAGCTAAC	hsa-mir-5579	2.96037	2.25486	1.17986	0.277384	1
HGLibB_53648	GTGGAGTCACGGGAATTACA	VNN2	2.95997	2.92762	1.35542	0.244333	1
HGLibA_48666	GCTGATGATCTGCCGCATCC	TBX22	2.95859	4.01791	1.76563	0.183924	0.852582
HGLibB_26149	TGGCCTCAGATGACCTGAAT	LCN9	2.95737	0.58433	1.04671	0.306266	1
HGLibA_48214	TCTACGTATGTTTGAAGCCA	TAF1A	2.95734	2.1905	1.16486	0.280461	1
HGLibB_57135	CAATCGGCGACGTTTTAAAT	NonTargetingControlGuideForHuman_0107	2.95721	2.37748	1.20317	0.272688	1
HGLibA_41128	CATCGACCTCTCAGAGCGAG	RHBDD2	2.95713	3.24792	1.46376	0.226332	0.959376
HGLibB_46738	AGGAGGAGTCGCTGTCCACG	SPRED3	2.95552	1.1526	1.05686	0.303933	1
HGLibB_32293	AGAGGGAATGAAATCCACAG	NOSTRIN	2.95486	2.45355	1.21755	0.269842	1
HGLibA_56908	GCATGTAAGGTGTACAAAGG	ZNF92	2.95483	1.65068	1.09198	0.296033	1
HGLibB_22150	CCTAGAAGAAAAATTCAAAG	HSD17B12	2.95468	1.035	1.05116	0.305239	1
HGLibB_46933	CCTACAAGTACAATGAGCTC	SRL	2.9538	2.0233	1.13693	0.286303	1
HGLibA_33516	TATGTACAGTGACGCCTTGA	OR10H4	2.95279	1.23626	1.05971	0.303282	1
HGLibA_61282	TGTTTTTTTTTTTTAACATC	hsa-mir-4794	2.95162	0.792913	1.04647	0.306321	1
HGLibA_17986	CTCCCGGGTTATCCTCGCGC	FREM2	2.95069	0.852447	1.04664	0.306283	1
HGLibB_25120	GTACTTGTCAGTCCGAGAGA	KLHL22	2.9493	0.577178	1.04232	0.307283	1
HGLibA_36600	AATGCACTGTGAATCTCGTC	PIGX	2.9492	3.43159	1.52532	0.216816	0.936578
HGLibA_09071	AAGGTGTGTTTCCTCGCCAC	CENPM	2.94842	1.97656	1.12666	0.288488	1
HGLibB_04532	CAGGGGACCTCTCTCACCAC	BIVM	2.94783	0.523106	1.03997	0.307829	1
HGLibB_46698	GACTGAGCCCAGAAGACATG	SPOCK3	2.94737	1.16431	1.05257	0.304916	1
HGLibA_36212	ATACTTACAGTCGTCCCGAC	PGAP3	2.94458	2.73082	1.28211	0.257507	1
HGLibA_56548	CTTCCTTGTAGAGTTTCCTC	ZNF69	2.94424	2.40496	1.19981	0.27336	1
HGLibA_06510	CATATCTCTTACAAACCTCG	C6orf70	2.94414	1.53732	1.07418	0.300004	1
HGLibB_33861	TGATGGTGGTGTTGCCTACG	OR2W3	2.94389	0.271633	1.0352	0.308941	1
HGLibA_02945	GATAACGTCGTGTCGACCAC	ARL15	2.94353	2.66427	1.26272	0.261137	1
HGLibB_01046	TGGCGATCAGGTAGATGCGC	ADRA2B	2.94346	3.6403	1.60266	0.205527	0.909382
HGLibA_33002	ACGGACTAGTCCTCAAGTTC	NUFIP2	2.94345	4.53065	1.88645	0.169603	0.814629
HGLibB_32860	CGGCGTCAGGCACATCATCC	NUBP2	2.9432	2.41945	1.20206	0.27291	1
HGLibB_48391	TGCTGATGAACTTGCAAAAA	TAX1BP1	2.94314	3.35133	1.48941	0.222308	0.950205
HGLibB_52926	ATTGCCAAACCTTGCGTTTC	UNC119B	2.94299	3.22858	1.44432	0.229441	0.966486
HGLibA_51389	CCGGGACACATGCTCGCGCT	TRIB1	2.94281	2.90935	1.33603	0.247736	1
HGLibB_34510	GGCTCACATCAATTGCACCC	OR8U1	2.94208	4.0192	1.74867	0.186045	0.8583
HGLibA_43721	ATACTCACGCCCTCTAGCAG	SFMBT1	2.94176	2.82094	1.30599	0.253122	1
HGLibB_37107	TATCCCCGATGAAAGCCAAG	PLEKHS1	2.94162	0.923758	1.04159	0.307452	1
HGLibA_01427	TCAACAAGCCATAGCCGAGC	AKAP2	2.941	3.93	1.70991	0.190998	0.87037
HGLibB_26582	TTTGTTGGAAAGATATTTCA	LIPI	2.94061	6.1429	1.93734	0.163958	0.798351
HGLibA_39405	TTTCTGCAGGGCACCTGTGC	PTP4A2	2.94043	5.27988	1.93841	0.163841	0.798246
HGLibB_41567	GTTAGCCTTCTATAGAGAAA	RNF212	2.94024	-0.134585	1.03857	0.308154	1
HGLibB_30031	ATGGCGGCCTCCGTGTGCAG	MRPS24	2.94013	1.50069	1.06829	0.301332	1
HGLibB_02704	TGATTTCCGAAAAAGCCCTT	ARHGAP11B	2.93943	2.69541	1.26828	0.26009	1
HGLibB_09359	TGCATTCTACAAAGAACAGC	CHCHD3	2.93888	4.71032	1.91213	0.166727	0.806479
HGLibA_04045	TACACGCTGAGCACGATCTG	B9D1	2.93885	-1.05904	1.04855	0.305842	1
HGLibB_39885	GCCTGCACCTGGCGTTCAAG	RAB40B	2.93785	2.33273	1.18047	0.27726	1
HGLibA_30944	GGCCTCGCGGATGGCGGCGC	MZT2A	2.93757	2.23173	1.15975	0.281518	1
HGLibA_31166	GGCTAGTGGTCATCCTCCTA	NAT10	2.93737	2.03406	1.12745	0.28832	1
HGLibB_10822	TGAACCGTCGCTCCAATGAG	COX4I2	2.93666	2.97029	1.35055	0.245181	1
HGLibB_55666	TTAACCCCAGCTCATATTCA	ZNF280D	2.93658	3.90017	1.69763	0.192598	0.875027
HGLibA_65160	GTGTATGAATGTTAATTCCG	NonTargetingControlGuideForHuman_0777	2.93633	1.54732	1.07016	0.300909	1
HGLibA_19168	CGGGGGCGGTCTGGTAAGAG	GJB5	2.93612	0.57642	1.03344	0.309351	1
HGLibB_35498	TGCCGGTGTCATCGCCATTT	PCDHGA8	2.93533	-1.86531	1.04994	0.305521	1
HGLibB_38488	GTGAGGCCAATGAAGAACTG	PRKCB	2.93421	3.84781	1.67395	0.19573	0.884306
HGLibA_43874	AGGTCCATCCGAGTATATCA	SH2B1	2.93395	3.04434	1.3724	0.241399	0.994728
HGLibB_56422	GAAGAGCTCAACGTGATAGA	ZNF665	2.93264	-0.757744	1.04014	0.307788	1
HGLibA_55964	CCTTCTTACCGAAGCCGGCT	ZNF425	2.93109	1.26284	1.04724	0.306144	1
HGLibA_16272	TTCATGGTAGTGGTGTTGTC	FAM172A	2.93004	2.6223	1.24096	0.265285	1
HGLibA_15166	CGGCGGGGAACGGCCGCGAT	ENPP1	2.92951	-0.22229	1.03398	0.309225	1
HGLibB_08357	GACCAGCTTCGTGTCCTTTG	CD37	2.92904	3.03439	1.36498	0.242676	0.997079
HGLibA_24114	CGCGTACAGGCGCTGCACAT	KBTBD7	2.92868	2.5901	1.23114	0.267185	1
HGLibB_37288	CCCAAACTTACCAATATTAG	PMS2	2.92733	2.62827	1.24071	0.265334	1
HGLibA_18370	CTGGTTAACTTTCCTATGGA	GABRA6	2.92722	2.82352	1.29708	0.254748	1
HGLibA_56386	ACATACACGTGATCTCATAC	ZNF613	2.92587	3.96694	1.71239	0.190675	0.869365
HGLibA_64508	CTCCTTACGTCGGGCATTAA	NonTargetingControlGuideForHuman_0125	2.92418	2.32534	1.16913	0.279581	1
HGLibA_10786	CGACGTGTCCTCCGAGCACG	CORO2B	2.92399	1.91976	1.10282	0.293648	1
HGLibB_56624	CATCCTCACCCAGGGAGACC	ZNF765	2.92371	1.18703	1.03894	0.308067	1
HGLibB_17622	CGGGGGCGCAGTTGTCCACC	FLNC	2.92228	3.04793	1.36273	0.243066	0.997971
HGLibA_64593	ACAAAATGCCGTGCGTCAAT	NonTargetingControlGuideForHuman_0210	2.92196	3.88943	1.67827	0.195155	0.882531
HGLibA_35755	CAGCTCACCCTTGTTTGTAA	PDCL3	2.92174	3.38741	1.47925	0.223892	0.954323
HGLibB_00059	GACGCCCAAGACGGAGATGA	AANAT	2.92144	0.992513	1.03028	0.310093	1
HGLibA_39208	AGGTGTAAGTAGGTACCGGA	PSMG2	2.91848	2.18259	1.13654	0.286385	1
HGLibA_63651	TCTGCCCGGTGTGTGTGTAG	hsa-mir-6867	2.91847	2.86345	1.30243	0.253769	1
HGLibB_14976	GCCATTATTTCTTCTCTGAG	EMB	2.91807	2.01016	1.11118	0.291826	1
HGLibB_39643	ATGCGAGGAAACTTTGTAAG	PYGO1	2.91599	1.89589	1.09442	0.295493	1
HGLibA_19051	AGCTGGTCATCTTCGTCATC	GHSR	2.91571	0.380217	1.01861	0.31285	1
HGLibA_63275	CCTCCCTCCCCCATGCCCCG	hsa-mir-6775	2.91545	2.86036	1.29882	0.254429	1
HGLibA_25930	AGGCCAGGCTTAGCGGGAAA	LAGE3	2.9151	2.34102	1.16609	0.280206	1
HGLibB_36100	TACCACTTTGAGCTGAGCAA	PFDN5	2.91344	2.1223	1.12296	0.289281	1
HGLibB_00827	GGTGACTCGGCTAGTGATCC	ADAMTS4	2.91306	1.44146	1.04536	0.306578	1
HGLibB_09588	TTTCTCAGGGAACTGCCGCG	CHRNB4	2.91272	3.07917	1.36651	0.242413	0.996735
HGLibB_35093	CTCCTCGCCTATCAGTCTAG	PAPOLB	2.91139	3.8674	1.65847	0.197811	0.889002
HGLibA_56937	CGCCCCATTTCGGGCACTAC	ZNRF1	2.91134	2.40486	1.17639	0.278093	1
HGLibB_34998	GAGAAAGATGGCTTTCCTTC	PAK2	2.91099	5.0868	1.89657	0.168462	0.811621
HGLibB_16757	TGAGTTCTGAGAGAAAGCAC	FAM86C1	2.9107	1.83753	1.0831	0.298005	1
HGLibB_27682	TAAGCTGCAAGAGGGCTGCG	LYPD4	2.90944	1.43966	1.04291	0.307146	1
HGLibB_31485	CAGCTATGTGATGCGCATGA	NDUFB7	2.90908	2.30321	1.15438	0.282634	1
HGLibA_38519	GTGTGCGGGCAGCCCCTCTA	PRKAG3	2.9088	2.11442	1.11899	0.290137	1
HGLibA_06358	ATCAGACTCGTCGTCGTCCC	C5orf15	2.90827	1.30143	1.03488	0.309016	1
HGLibB_10421	CTCCACAGGGAAGGGCCAAA	CNTNAP4	2.90819	1.49847	1.0479	0.305991	1
HGLibB_28179	TAGCTTGTTATGGAGTTCTG	MAP4K4	2.90793	0.81665	1.01929	0.312688	1
HGLibA_01465	CTGACCAACTCAACCCGAAA	AKNAD1	2.90727	2.60846	1.21973	0.269414	1
HGLibA_63141	TTTTTAGCTGGTGCAGAGGA	hsa-mir-6747	2.90696	2.34542	1.16105	0.281247	1
HGLibB_55751	GGGCATTGCTGGACAGCGCA	ZNF333	2.90687	1.63942	1.06028	0.303152	1
HGLibA_05823	CGCTGCAGGGTCGCCGACCC	C1orf204	2.90655	3.54495	1.52744	0.216497	0.935802
HGLibB_50423	CTCATTACCCAACTATCTGA	TMEM64	2.90593	2.65914	1.23321	0.266783	1
HGLibA_57792	CCATAGAGAACAGCGAGGCC	hsa-mir-135a-1	2.90587	1.39246	1.03786	0.308319	1
HGLibB_41880	GATGGTGGCCGCAAAGAAGA	RPL30	2.90547	1.54252	1.05003	0.305499	1
HGLibA_10020	GACTCACTGTCATTGAGTGC	CLIC1	2.90466	2.71318	1.24722	0.264085	1
HGLibB_13027	CACGTTGTCGTTCTCAGACA	DGCR2	2.90447	2.76482	1.26201	0.261271	1
HGLibA_29817	CATGAGGCTACCCCTGCTCC	MRC1	2.90365	6.09961	1.8954	0.168594	0.812159
HGLibB_40641	CCCACTGATGCAGCTCTCTA	RCE1	2.90358	3.27383	1.42637	0.232358	0.973766
HGLibA_37511	TTTCTACATTGCGACCAGAA	POLE	2.90311	1.93742	1.09152	0.296134	1
HGLibB_07955	CACAGATTCAAGCTGAAGAG	CCL1	2.90291	2.57749	1.2089	0.271549	1
HGLibB_12699	AGGCAGCTAGAGACATGAAG	DDX42	2.90205	0.874275	1.01642	0.31337	1
HGLibB_21552	TCATCTACTTGCTGAAAGTG	HK1	2.90029	3.54953	1.52599	0.216716	0.936344
HGLibA_19999	ATACACTAGTGATTCGAAAC	GPR21	2.89905	2.55614	1.20084	0.273154	1
HGLibB_53694	TTATGACTATCTCAAGACTC	VPS29	2.89704	1.65046	1.05512	0.304332	1
HGLibB_17692	GAAGTGGTCACTGAATCTGA	FMO5	2.89691	1.41706	1.03336	0.309371	1
HGLibB_57893	TAGATCGAGTTTATTTTCCT	NonTargetingControlGuideForHuman_0865	2.89522	-0.32588	1.01284	0.314223	1
HGLibA_09131	AGATGCCACCTAATATAAAC	CEP290	2.89433	0.833287	1.01148	0.314549	1
HGLibA_08714	ATTCATCAAGCCAATCTCGT	CDIP1	2.89396	2.5428	1.19347	0.274632	1
HGLibB_07204	GGATTTCCATCGATGCAGAG	CAPZA3	2.89386	2.83088	1.27334	0.259141	1
HGLibA_49634	TGGAACTGTGAAGACGATCA	TLN1	2.89299	1.62982	1.05049	0.305394	1
HGLibA_13721	AACTACAGGCTCACTACCAA	DNTTIP2	2.8923	-0.685162	1.01318	0.314142	1
HGLibA_18717	GGGACTTGGAACACGTGGTA	GBAS	2.8917	2.54214	1.19154	0.275019	1
HGLibB_37441	TACCCACACAAAATAAAGAG	POLB	2.89029	0.952495	1.01019	0.314857	1
HGLibB_06236	AATTTAAAGGTTGCGAGGGG	C3orf37	2.88962	0.956591	1.01003	0.314895	1
HGLibB_09625	GAAGAACTCGCCCACGAACG	CHST3	2.88956	0.185636	1.00375	0.316406	1
HGLibA_44294	AATGAACTTACCTTCCAACA	SKP1	2.88899	1.5586	1.0412	0.307543	1
HGLibA_30717	AATCTTGCCTACTCACGTTT	MYH15	2.88824	3.83458	1.62308	0.202663	0.901558
HGLibA_53686	GGAATGAAGGCTCACGACAG	VMA21	2.888	1.9722	1.08632	0.297288	1
HGLibA_60655	AGGCCCGGGGACCCCTGCCG	hsa-mir-4638	2.88703	1.49308	1.03372	0.309285	1
HGLibB_22007	ACCGCTCTCACCAATGGCCC	HPN	2.88691	5.35557	1.87973	0.170365	0.81609
HGLibB_46567	CCTAGAAATTCCAATCAGTG	SPERT	2.88669	2.10807	1.10348	0.293504	1
HGLibB_21524	GAGCGCGTACACCACATCCA	HIST2H4B	2.88661	2.18232	1.11501	0.290997	1
HGLibB_39002	TCTGACCATTCAGCAACCAC	PSG6	2.88649	1.78761	1.06089	0.303012	1
HGLibB_51675	TGACATAGGCCACAATCTTC	TRPC5	2.88526	2.98695	1.31459	0.251565	1
HGLibB_36675	CGGAGGAACCAGCTCCGCTG	PIP5KL1	2.88505	0.741976	1.00445	0.316237	1
HGLibA_19911	CCATCATCCACCGGCTACGG	GPR142	2.88468	-0.0182535	1.00533	0.316025	1
HGLibA_09667	GGGCGTGGAGCTATGGGTCG	CHTOP	2.88439	2.56657	1.19282	0.274761	1
HGLibB_46173	GCTGGCGCCGTTGACGCGCA	SOX10	2.88371	2.00215	1.08722	0.297089	1
HGLibB_10484	ACCTTGTAGTCAGAGACATC	COIL	2.88352	4.33362	1.78479	0.181562	0.846575
HGLibB_18818	CAGTTTCATGAGGTCCGTGG	GDAP1L1	2.88317	4.48661	1.81192	0.178278	0.837724
HGLibA_40974	GTACTTACGAAATGGTACCT	RFX5	2.88297	3.40902	1.45758	0.227316	0.961366
HGLibA_47946	GGAGGGGTCCCTCGCTGCGG	SYF2	2.88239	1.64928	1.04527	0.306598	1
HGLibB_43036	AGATGCAGATCAAATGACAA	SCYL2	2.88066	1.24798	1.01556	0.313575	1
HGLibA_53025	CTTACAGGCTATGCGCACAG	UNC5D	2.8805	1.84857	1.06504	0.302068	1
HGLibA_62744	TCAATTTTAAAGGCTTCTTT	hsa-mir-626	2.87962	-0.32215	1.00379	0.316395	1
HGLibB_11900	GGCTTGGAGGCCAGCAACAA	CXorf27	2.87939	2.82626	1.2609	0.261482	1
HGLibA_31942	AGCACGGCTGAACCTGAATG	NINJ2	2.87891	4.41472	1.76942	0.183454	0.851251
HGLibA_51801	CAAAAGTATGGCCGCTTCTG	TRUB1	2.87852	1.10605	1.00684	0.315662	1
HGLibA_10189	GAGAAAATGCCTGAAGAATG	CMC2	2.87841	1.2607	1.01447	0.313834	1
HGLibA_63874	GGAGACTAGATCTTTGACTC	hsa-mir-7161	2.87807	2.34527	1.14097	0.285448	1
HGLibB_08569	CCAAACGCAGTCTCCTGTCC	CDC42EP4	2.87786	3.72945	1.57311	0.209756	0.919898
HGLibB_10764	GGGGAGGTCAGCCCGTTCTC	CORO1B	2.87768	2.18401	1.10911	0.292275	1
HGLibA_59662	GAATGAGGGATATAGAGAGC	hsa-mir-3976	2.87749	1.79253	1.05565	0.30421	1
HGLibB_39253	TCCTCGTCGAAGTACGAAGA	PTF1A	2.87668	3.97852	1.66797	0.196531	0.886367
HGLibB_51851	GCTCAGACAGTCGCCTTCCA	TSPAN18	2.87642	2.99183	1.30885	0.252603	1
HGLibB_45629	AATCCACAGACATGATACGC	SMCR8	2.87621	1.795	1.05522	0.304308	1
HGLibA_28871	TACGACGATCTACCCCATTA	MEIS1	2.87538	2.35572	1.14133	0.28537	1
HGLibA_36561	AGGTGTGTACATCCCGATTC	PIGK	2.875	1.45713	1.02316	0.31177	1
HGLibA_57495	GGCGTGGTGGTGGGGGCCTG	hsa-mir-1268a	2.875	1.85796	1.06249	0.302647	1
HGLibB_38593	CTCGTAGTACCTGTTGCCCT	PRND	2.87438	2.34581	1.13842	0.285986	1
HGLibA_49999	CAGATCACGCGCTACCGCAA	TMEM151A	2.87275	1.66935	1.04111	0.307563	1
HGLibA_10459	CCAACCTTATACAGAACGTG	COASY	2.8727	3.26015	1.39546	0.237486	0.986527
HGLibB_09552	GAATACCAGGCCAGTTAAGA	CHRNA1	2.87233	4.56269	1.81243	0.178217	0.837534
HGLibA_19385	AAGAAGCATTTCTTTCCGCG	GLYR1	2.87188	4.15625	1.71449	0.190404	0.868808
HGLibB_45251	ATACCTTAGGGGTAAACATG	SLC6A15	2.87139	3.12082	1.34633	0.24592	1
HGLibA_09297	GAGCATATCCCACTCCACTA	CGA	2.87131	2.37772	1.14277	0.285068	1
HGLibB_10679	TGCTCTCGCCGGCCTCGCCA	COMTD1	2.8711	1.60354	1.0339	0.309244	1
HGLibB_37602	ATCAGGGGCTTAAATGCCGA	POM121L2	2.86959	1.78476	1.04959	0.305602	1
HGLibA_34396	GTGCAAGCAATCAGCAGCAT	OR6C65	2.86957	2.155	1.09802	0.294702	1
HGLibB_46491	AGAGTGCATAGTCAAAGACT	SPATS2	2.86941	4.28603	1.75476	0.18528	0.856226
HGLibA_17372	CTGCGAGTGGTGGCTATCCA	FGF13	2.86829	1.34872	1.01219	0.31438	1
HGLibB_28423	TCTCAGGGGATGGCACCCAA	MBD1	2.86806	1.17588	1.00378	0.316397	1
HGLibA_06517	AAGTCCCACTGGCAGTTGAC	C7	2.86765	3.53805	1.49204	0.2219	0.948997
HGLibA_23505	TACACAAAATCGAACCCTCA	IQCF2	2.86678	2.80398	1.24477	0.264553	1
HGLibA_54257	CAAGAACGAGAGACACCATG	WFDC12	2.86666	2.17555	1.10017	0.294228	1
HGLibB_26011	ATGTAGATTCCTCTCGACTG	LARS2	2.8662	0.648632	0.99158	0.319356	1
HGLibA_29884	GCGCGCAACGACACGAACCG	MRP63	2.86488	1.06991	0.996892	0.318064	1
HGLibA_47503	TGTCTGGCTTAATATCCCGA	STK38L	2.86393	0.974104	0.994859	0.318558	1
HGLibA_46493	TGACGAGTTGAAGACGCACC	SPATA31C2	2.8637	2.89076	1.26774	0.260192	1
HGLibB_12229	GCTGAAATATGAAATTGCAG	CYTH3	2.86316	1.87056	1.0561	0.304107	1
HGLibB_35490	GTAGACATTCTGGCGGTAGT	PCDHGA6	2.86221	0.644297	0.989051	0.319975	1
HGLibB_20848	TATTCAAGCTGAAATCTACC	HAUS2	2.86174	2.93268	1.27915	0.258058	1
HGLibA_51628	ACGGTGATCGTGGACATGCG	TRIO	2.86132	2.87931	1.26261	0.261158	1
HGLibA_40550	GTGATCCGTGACAAGCGCAC	RBM42	2.86043	2.04946	1.07804	0.299137	1
HGLibA_61919	GGTCAGTGCAAAAGTAATTG	hsa-mir-548as	2.86018	0.0717261	0.986262	0.320658	1
HGLibA_23795	TGAGCAGAACTTCACCGCGT	ITGB7	2.86002	6.07047	1.84598	0.174251	0.826601
HGLibB_13808	AAGAAGATACTCCCAAGCGT	DPF2	2.85996	3.2787	1.39111	0.238218	0.988192
HGLibB_24453	TGTGGTCCACTGATAATATC	KDM1A	2.85986	2.51754	1.16252	0.280943	1
HGLibA_49248	CTCAGCCGGGCCGTCCGCAG	TGIF2LX	2.85869	0.75617	0.988741	0.32005	1
HGLibB_48768	AGTGTGTATAGATGTCCAGA	TCOF1	2.85841	1.33486	1.0053	0.31603	1
HGLibA_41941	GTTGCTTCCATAACCAATGT	RPL32	2.85774	2.32134	1.12222	0.28944	1
HGLibA_39319	CCTGGCAAAACTTTCGAAGA	PTGER3	2.85748	0.306716	0.982703	0.321532	1
HGLibA_60858	ACTTGACCTTTGGCTGTTGG	hsa-mir-4687	2.85667	3.75505	1.56193	0.211383	0.923317
HGLibA_34604	AGGCCATTCTGCTTCAGACA	ORC2	2.85602	2.68199	1.2021	0.272903	1
HGLibA_26375	CCGCCCTGCATTTCAACCCC	LGALS7B	2.85584	3.3165	1.40072	0.236604	0.984115
HGLibA_29104	TCACGGGATGGCAGCGAGCG	MFSD5	2.8557	2.06476	1.07691	0.29939	1
HGLibA_00645	TGCACATTGACGTTCTTATA	ACTN4	2.85518	1.13322	0.994358	0.318679	1
HGLibA_61112	GTGTGGCAGGCACATGCGCA	hsa-mir-4754	2.85487	3.00628	1.29646	0.254861	1
HGLibB_54534	TCAAGCAGAAGTTTGACATA	XRCC6BP1	2.85487	3.47697	1.45636	0.227511	0.961822
HGLibA_61304	GCCTATGTGGACTGACAGGT	hsa-mir-4800	2.85486	1.49667	1.01415	0.31391	1
HGLibA_32346	ACAGGCAGGCATCGGTCCAT	NOTCH2NL	2.85483	2.61626	1.18429	0.276485	1
HGLibA_10401	AGGTACATTACTTGTAAACC	CNTN1	2.85443	2.51344	1.15779	0.281924	1
HGLibB_07015	CGAGACACTGCCTTCCGAGC	CALHM3	2.85395	3.44033	1.44327	0.22961	0.966762
HGLibA_14754	GTACTTGTCATCAAAGACCC	EIF2S1	2.85341	0.857295	0.986446	0.320613	1
HGLibB_24584	GCCCAAGAATATATCATTCC	KIAA0317	2.85332	3.82371	1.58423	0.208152	0.915831
HGLibB_24567	GTCATTGACCAAAAGATTGA	KIAA0196	2.85326	3.81756	1.58224	0.208438	0.91658
HGLibA_42596	CGCAGTAGATGCGCACGTAC	S1PR2	2.8525	3.33105	1.40122	0.23652	0.983977
HGLibB_49492	GAAAGCACTGCCTACACCGC	TINF2	2.85097	2.846	1.24496	0.264517	1
HGLibA_17453	ACCCTCGGCCCGACATCACG	FGFRL1	2.85084	2.51525	1.15547	0.282408	1
HGLibB_53572	GGTGTAGGCGGCTGCGAAGT	VGLL2	2.85071	2.66407	1.1932	0.274686	1
HGLibA_17520	AACTGACATACCATAAACAC	FIGN	2.85027	1.42146	1.0042	0.316296	1
HGLibA_59189	CAAGGACAGCAAGAAAAATG	hsa-mir-365b	2.85011	2.13654	1.08254	0.298129	1
HGLibB_02834	TAGGTATGTCCTGAGTGAAC	ARHGEF25	2.84978	1.5848	1.01897	0.312764	1
HGLibA_14087	GATTTCACCTCAAGTCGATC	DTX3L	2.84974	1.8516	1.0453	0.306593	1
HGLibB_53805	CAGTATTAATCAGCCTCATG	VSTM5	2.84889	4.21168	1.70846	0.191186	0.870871
HGLibA_45283	GTGGTCTTAAAGCAGTTATC	SLC5A8	2.84851	2.17874	1.08846	0.296812	1
HGLibA_09901	CGTGTCGCAGAAGTACGAGC	CLDN5	2.84828	3.15131	1.33739	0.247494	1
HGLibA_55348	CTCTCAGATCGACGCGCCCC	ZKSCAN2	2.84777	2.64377	1.18624	0.276089	1
HGLibA_52419	TGAACTTTGCGGCGCCCTTA	TXNDC2	2.84715	4.62532	1.79479	0.180344	0.843195
HGLibB_26316	GGGCAAAGTTGTAAATGCGT	LGALS14	2.84469	2.75039	1.21266	0.270805	1
HGLibB_50197	CGGGATGTACGTGAGCGCAG	TMEM231	2.84436	1.37538	0.998417	0.317694	1
HGLibB_53014	GTGAGCCCCTGGTGTCCATC	UPK3B	2.84406	2.05168	1.06744	0.301525	1
HGLibA_15777	GTGCGCGTTGTATGCGGTCC	EXOSC3	2.84372	5.00177	1.81693	0.177679	0.8364
HGLibB_25328	TGGAGAAGCCTCAGGAAAAG	KPNA4	2.84364	2.99928	1.28402	0.257152	1
HGLibB_08372	CAGAGACTGACATGGAACAG	CD3G	2.8431	2.8137	1.22858	0.267683	1
HGLibA_31949	TGGATTCACGACCGTCTCCG	NIPA1	2.84297	3.27813	1.37593	0.240795	0.993918
HGLibB_31693	CGCAGTAGCCGTGGGTCCGC	NEUROD2	2.84272	5.6086	1.8316	0.175938	0.831826
HGLibB_54032	AGGTGTGCGCATCTACAACG	WDR45	2.84234	1.47899	1.00468	0.316182	1
HGLibB_48971	CCTAGAACTGCCTGATAAAG	TESK2	2.84206	2.03283	1.06385	0.30234	1
HGLibA_33868	GGCCAACCACACTGGAAGGT	OR2T29	2.84201	0.802714	0.979331	0.322364	1
HGLibA_23796	GGGACGCACAAGCCTTCGAG	ITGB7	2.84192	-0.0175843	0.976184	0.323143	1
HGLibA_19520	CCGCCAGCATAGCACAAGCC	GNG2	2.83962	2.38268	1.12155	0.289584	1
HGLibA_42287	TAGGGTCTGGCATTCCGCAG	RRP9	2.83923	0.634666	0.975695	0.323264	1
HGLibB_12282	CCGTGGGGTCGAAGACGCAG	DAGLA	2.83888	5.43732	1.81458	0.177959	0.837183
HGLibA_00335	ATAGTAATCCCGCCTCCTGC	ABTB1	2.83871	3.294	1.378	0.240442	0.993271
HGLibB_39011	GGCAAACCAAATAAAAGAAA	PSIP1	2.83798	-0.364367	0.978607	0.322543	1
HGLibA_34702	CTTAGGCGGATCCTCTTGCG	OSR2	2.83714	2.03367	1.06079	0.303035	1
HGLibB_29329	GGTTGGAATGAAGACTCCGA	MLEC	2.83707	1.37606	0.993924	0.318785	1
HGLibB_12414	ATCCTATATGTTCAATGACC	DCAF13	2.83674	3.98135	1.62891	0.201853	0.899616
HGLibB_27225	CCCCCTCAGACAGCATCCGG	LRRC16B	2.83463	3.72217	1.52908	0.216251	0.935563
HGLibA_06800	ACTGTCTGTCTGAATATCGA	CA14	2.83345	3.28432	1.36944	0.241909	0.995442
HGLibA_64029	TTGGTGCCGTGACTAGGATC	hsa-mir-7975	2.8331	1.73771	1.02202	0.312039	1
HGLibA_22982	TGTCCAGTGGGCGACATTCG	IL15RA	2.83257	1.59942	1.00933	0.315064	1
HGLibA_01637	GGCGGCGCTCACAATTGCCA	ALG8	2.83194	3.49075	1.44202	0.229812	0.967311
HGLibB_04051	AGTACAGATTGGACTATCTA	BAAT	2.8316	3.10038	1.30729	0.252886	1
HGLibA_11245	CGGAAAGCACAACGAGCGCC	CRYAA	2.83064	2.2531	1.09058	0.296344	1
HGLibB_32913	CTCACCTCCCATAAACCCAG	NUDT17	2.82995	2.07128	1.06073	0.30305	1
HGLibA_05753	GCACCTGGAGTACGCGGACG	C1orf115	2.8299	2.9248	1.25156	0.263255	1
HGLibB_02692	TGCCGCACAAAAAGCTAGAG	ARGLU1	2.82981	-2.07902	0.984725	0.321035	1
HGLibB_05697	AGCATGCCTTTATCGGGGAG	C19orf71	2.8298	2.20858	1.08144	0.298376	1
HGLibB_14778	TTCAGCCGTAAGAACTAAAA	EIF3M	2.82933	1.66959	1.01356	0.314052	1
HGLibB_19650	GCGCCCCTACACAGACTATG	GORASP1	2.82915	0.971692	0.973655	0.32377	1
HGLibA_27865	GGCTTCGATGGCTACGCGCG	MAF	2.82882	4.32778	1.72412	0.189164	0.865485
HGLibA_02573	ACGACGACCACCCTCTGTCC	APRT	2.8284	4.25257	1.69995	0.192294	0.874181
HGLibA_25909	ATCACAGCTCAAGAACTAAG	LACC1	2.8283	0.295995	0.964635	0.326022	1
HGLibA_49060	TCCGTGCCGGAACCCACTAC	TEX13B	2.82711	3.67307	1.50435	0.220004	0.943833
HGLibA_45564	TTCAGAAGAGTGCTCCCTCG	SLX4	2.82708	3.8871	1.58163	0.208526	0.916768
HGLibB_01186	GTAGTATTCCTGCAATCCCG	AGFG2	2.82664	0.899051	0.970707	0.324504	1
HGLibB_35001	TTTGCAGATAAAAGTGCACA	PAK3	2.82615	4.33194	1.72264	0.189354	0.865803
HGLibB_09699	AGCAAATGCGTGTGCGAGTC	CILP	2.8259	0.646213	0.96724	0.325369	1
HGLibA_26686	ACTAGCCGTCTACGGGCTTC	LMF2	2.8258	2.18475	1.07376	0.300097	1
HGLibB_36253	CTTTGGCAAGTAAAATACGC	PHACTR2	2.82573	5.2101	1.79815	0.179936	0.842015
HGLibA_52635	ATATTAGATACCTGTTTCTA	UBE2N	2.82563	2.07163	1.05792	0.30369	1
HGLibB_35034	ACTAAAGCACCAGCATTTGA	PALMD	2.82554	2.61448	1.16241	0.280966	1
HGLibA_04428	CCAGGTTCGCGTAGCGGATG	BEST4	2.825	1.27745	0.982017	0.321701	1
HGLibB_07446	AGAGCCTGAAGAATTTGTCG	CBX3	2.82376	2.1865	1.07339	0.300181	1
HGLibA_52895	TACCATTCCTTGGACGTGAT	UGT1A7	2.82341	1.13821	0.974851	0.323473	1
HGLibA_50964	GGCAATGAGAGTTTCCGCAA	TOMM34	2.82329	2.9256	1.24511	0.264489	1
HGLibA_35093	GCTACTGCTGGATTAGCGCC	PAN3	2.82245	1.05155	0.970111	0.324653	1
HGLibA_08370	TAGCCTTACCTTGCGAGAGA	CD3D	2.82244	2.0554	1.05363	0.304673	1
HGLibB_03042	CAGAGATATTATTCGTGATC	ARMCX3	2.82215	2.6219	1.16182	0.281088	1
HGLibB_32194	AGCCTGTTCATGCGAAGAAA	NOC3L	2.8219	1.2716	0.979906	0.322222	1
HGLibB_20733	GCGGGCCCTCTTAGTACTCC	H2AFX	2.82166	2.53773	1.14028	0.285592	1
HGLibB_29349	GATCCCGCAAGAGCAAATCA	MLKL	2.82137	1.55961	0.999008	0.317551	1
HGLibA_19060	AAAGCGGACGGCTATCGGCA	GIF	2.82107	0.789981	0.966312	0.325602	1
HGLibA_41607	CCCTTGACTAGACTGCAGCG	RNF2	2.82085	3.90822	1.58429	0.208143	0.915831
HGLibB_42381	ATATACACACCCACTGGTCG	RTTN	2.81985	2.02515	1.04813	0.305939	1
HGLibA_17645	CCCAAGAAAGCCATCGCCTA	FLNC	2.81963	3.15174	1.31372	0.251722	1
HGLibA_12145	ATGGAGATGAGCGGCACCCG	CYP2U1	2.81857	4.90329	1.78488	0.181552	0.846562
HGLibB_35185	GGGGGCGCAAGGCACAATGT	PARP2	2.81835	1.57496	0.998271	0.317729	1
HGLibB_44552	CAGCACGAAGAGGTTGCGAG	SLC23A1	2.81762	3.43188	1.40735	0.235496	0.981381
HGLibA_34813	CTCACCACCAACCAAAACCG	OXCT1	2.81727	1.56013	0.996087	0.318259	1
HGLibA_22185	CATATGGTGTCCGAGTCAAC	HSD17B14	2.81686	2.52852	1.13442	0.286835	1
HGLibA_12815	CTGGAACAGGCACCAAAAAC	DEFB103B	2.81663	4.47978	1.73763	0.187439	0.861814
HGLibB_37902	TGCCATGCAAATTCTTGAAG	PPIL6	2.81599	2.21526	1.07356	0.300142	1
HGLibA_17935	CCCACCCACAGGGATCAACG	FOXP3	2.81592	0.0492317	0.96058	0.327041	1
HGLibB_09831	GGGCTGCGTGAGGGCTTCTC	CLCNKA	2.81535	3.442	1.40973	0.235102	0.980301
HGLibB_55195	GGGGCAGTTACCTGTACTGC	ZFR2	2.81515	2.35173	1.09885	0.29452	1
HGLibA_09342	GTTTCAGCGTGGTTACACCC	CHAD	2.81497	1.60866	0.998993	0.317554	1
HGLibB_12935	GTCTGCGGGGCAGGGTCCGA	DENND4B	2.81416	3.46461	1.41597	0.234069	0.977845
HGLibB_54088	AGGAGTCCCATATAATCACC	WDR66	2.81399	2.10119	1.05409	0.304566	1
HGLibB_39563	AAGGCGGTGGGAGCCTTTAG	PVALB	2.8135	1.82161	1.01809	0.312971	1
HGLibB_08963	AAGCTGACATTGTGTTGCGC	CEBPZ	2.8135	2.39646	1.1061	0.29293	1
HGLibB_32826	GTGTGCGTCATCGATGAGAT	NTPCR	2.81321	3.74446	1.51649	0.218151	0.939843
HGLibB_50940	CGACTACATCGTGCTGTGGC	TOP3B	2.81269	3.84011	1.55081	0.213016	0.927252
HGLibB_23410	CTCTGAGCAGCATAGTGCAA	INVS	2.81253	1.90391	1.02794	0.310643	1
HGLibA_57314	AGGAGCCTGTGGGAGGGCAG	hsa-mir-1229	2.81156	2.38315	1.10228	0.293767	1
HGLibA_49076	TGGCGCGCAGTGCGCCTTTC	TEX22	2.81156	1.99863	1.03935	0.307972	1
HGLibA_33985	ACTCACTGATAACCGGGTGC	OR4E2	2.81154	2.03988	1.04455	0.306765	1
HGLibB_18824	GACATTGAGTTTACTTCTGA	GDE1	2.81135	3.71596	1.50476	0.21994	0.943729
HGLibB_09508	AGAGGCGAGTGATTTGACTG	CHP1	2.81097	2.01297	1.04096	0.307598	1
HGLibA_30498	GGCCATAGTCAACGACATGA	MTSS1L	2.8095	1.54063	0.989853	0.319778	1
HGLibA_58674	CCCTTCTGCCTCCTTTGACG	hsa-mir-3154	2.80939	1.6279	0.997416	0.317936	1
HGLibB_51271	GGTTTACAAAAGATACTGCA	TRAPPC6B	2.80846	3.65002	1.47912	0.223912	0.954343
HGLibB_54002	TTATTCAACATTCCTATAGG	WDR33	2.80844	1.16919	0.966984	0.325433	1
HGLibB_20864	GCGCACACAGCATCAGCTCG	HAUS7	2.80711	1.17007	0.966125	0.325649	1
HGLibA_57135	GTACAGGCCACTGCCTTGCC	hsa-let-7g	2.8065	1.40151	0.976463	0.323073	1
HGLibA_10724	GCAGGAGGGCCGAAATATCG	COPS6	2.80566	1.87077	1.01956	0.312624	1
HGLibB_00016	CGTGCGTCGTGGGGCAGTAG	A4GALT	2.80546	2.47328	1.11528	0.290938	1
HGLibA_03681	TCCACAAGGTTACGGACAAA	ATP5L2	2.80463	1.30299	0.970986	0.324434	1
HGLibB_04790	GCCACAAGAAGAGCAAGTTG	BRDT	2.80448	1.62759	0.99433	0.318686	1
HGLibB_44483	AGAAAAGTTGCACGCACAAA	SLC22A10	2.80231	1.51937	0.983231	0.321403	1
HGLibA_21968	GCTCGAGGACAGCCTATACC	HOXC4	2.80194	0.982976	0.957165	0.327902	1
HGLibB_51549	CCATCACTGGGGTGTCAGAA	TRIM77	2.80182	5.559	1.7859	0.181427	0.846205
HGLibB_50142	AAAAGAAGACCAACGTCACA	TMEM208	2.8008	1.07923	0.95835	0.327603	1
HGLibB_35620	GTACCATTGCTGATTCCACA	PCSK1	2.79865	1.89607	1.01805	0.312983	1
HGLibB_12647	CTTCTAGCAGCTGCAAAAAC	DDX18	2.79854	2.48994	1.11355	0.291311	1
HGLibA_53120	GTCTTCAAGAGAAAGCAGCG	UQCRFS1	2.79804	1.17801	0.961047	0.326923	1
HGLibA_59488	GTTATTTGCATATATGTTAC	hsa-mir-384	2.79803	2.65413	1.15249	0.283029	1
HGLibA_08026	TTACTTGGTGCTGAGAGCGC	CCL4	2.79788	2.85388	1.20651	0.272025	1
HGLibB_28171	GGACCTGGTGGCACTGAAGA	MAP4K1	2.79716	2.3224	1.08087	0.298503	1
HGLibB_06024	GATGCGATCAGAAGCTGCAA	C20orf85	2.79695	2.98794	1.24493	0.264523	1
HGLibB_34637	TCCATCCCCTTTACAGTGTA	OSGEP	2.79663	5.2383	1.77324	0.182982	0.850003
HGLibA_51293	TGCTGCTGATAATCGAGTGC	TRAP1	2.79613	3.98358	1.58867	0.207517	0.914447
HGLibA_14666	GTTCGGGCACGGCTACGGCG	EHD1	2.79573	0.678993	0.950036	0.32971	1
HGLibB_19141	GTCGTACAGGGACGGGGCAT	GJB4	2.79552	2.51448	1.1161	0.290759	1
HGLibB_02586	AAGGCCACTCAGCTGGAATG	AQP12B	2.79535	0.54652	0.947259	0.330418	1
HGLibA_26605	CCACATAGCGGGATTTGTGC	LIPE	2.79529	1.26755	0.963379	0.326337	1
HGLibA_13953	TGATGTTTCGTTACCATCAC	DRAXIN	2.79497	2.72154	1.16764	0.279886	1
HGLibA_38036	CAGCCAAGCCCCTCCCACGA	PPP1R14A	2.794	3.92822	1.56572	0.210829	0.921892
HGLibA_41002	TCACCTTCATCAGTAGTTCT	RGL1	2.79384	1.05561	0.95325	0.328893	1
HGLibA_65032	TTCAGCGAGTGTGACTAAGC	NonTargetingControlGuideForHuman_0649	2.79329	2.97881	1.2392	0.265626	1
HGLibB_48957	AGCAGTCAAAAAGATGCTTG	TERF2IP	2.79288	2.10002	1.03968	0.307896	1
HGLibA_63181	GGACCCCTGGGCAGGGAGGA	hsa-mir-6756	2.79273	1.09272	0.953871	0.328736	1
HGLibB_05316	TGCTCCAGACTATCCAGCAG	C14orf119	2.79265	2.39337	1.09093	0.296265	1
HGLibB_57834	GTCAAGAGATTATGAGATTC	NonTargetingControlGuideForHuman_0806	2.79244	0.209972	0.944068	0.331234	1
HGLibB_50260	GCTATGGACTCTCTATAAGA	TMEM252	2.79215	1.61459	0.985461	0.320854	1
HGLibA_45069	CCTATCCCGATGTAGCTATC	SLC38A4	2.7921	0.978728	0.950977	0.329471	1
HGLibB_02925	TGCTGTCCAGCACGTACACG	ARL11	2.79206	2.80338	1.18783	0.275767	1
HGLibB_31873	AGCGGTTTCCAACCTAGATG	NHSL1	2.79136	1.88631	1.0122	0.314378	1
HGLibA_52080	AGATCTGATCAGCCTGTACG	TTC23L	2.79106	1.30299	0.962703	0.326507	1
HGLibA_54155	TCCTGTTTACTATATTCGAG	WDR66	2.79063	2.11213	1.03987	0.307852	1
HGLibA_55734	ATAACACGCATTGCGGGGGA	ZNF281	2.79001	2.83479	1.19527	0.27427	1
HGLibB_42691	CGTGTGTGGACGGATGATTT	SARDH	2.78986	3.11945	1.27887	0.25811	1
HGLibB_09743	TCCTACAGGTGTGGACTTCC	CIZ1	2.78978	1.36665	0.964678	0.326011	1
HGLibB_21278	TTTGCAGCAATTGTTGCATA	HIGD1A	2.78925	3.51875	1.41393	0.234405	0.978745
HGLibB_30147	CTCACAGACCTCCTTAACCG	MSGN1	2.7891	1.54885	0.977544	0.322806	1
HGLibB_15491	ACTTACTCTTCCACATGTGT	ERN1	2.78865	3.86318	1.53508	0.215352	0.933396
HGLibB_10197	ATTTATAACAATCACAAGTC	CMTM1	2.7885	2.69325	1.15475	0.282558	1
HGLibA_47777	AGAAACCTGAGTGAATTCAT	SUMO1	2.78838	2.55186	1.11959	0.290007	1
HGLibA_42329	AAGAAAAAAGCAGACAAAAA	RSPH10B2	2.78834	1.04134	0.949394	0.329874	1
HGLibA_04253	TATGATTGAACACGCACAGA	BCAS2	2.78823	1.57943	0.979932	0.322216	1
HGLibA_09833	TACCTGATAAAAGCCCAATA	CLCN5	2.78753	2.48277	1.10462	0.293254	1
HGLibA_48392	TGTCGCGCCACAGAATCAGT	TAS2R38	2.78752	2.40449	1.08974	0.296528	1
HGLibA_06693	CCCAGCACGATGTTCCTCAC	C9orf153	2.7873	1.10878	0.951515	0.329334	1
HGLibB_49536	CGCTGACCTTCCGGGCGCTC	TLCD1	2.78721	2.23661	1.05816	0.303635	1
HGLibA_29829	GCGTCGCTGACGCGCGAGCA	MRFAP1	2.78707	2.52574	1.1128	0.291474	1
HGLibB_07910	TGAGTACAGTCGGAAACTAG	CCDC89	2.78565	1.73431	0.991684	0.319331	1
HGLibA_09854	GGACCGAGGCAGCAATCATC	CLDN11	2.78541	2.54835	1.11706	0.290552	1
HGLibA_20035	ACACGATGCACATGACCGAC	GPR37L1	2.78535	3.59517	1.43826	0.23042	0.968866
HGLibB_06336	GCTGCATGAACTCGAAGGCG	C4orf48	2.78496	2.2957	1.06675	0.301681	1
HGLibA_02411	ATCTTAAAGACTAGCCGCTC	APEX2	2.78487	3.87745	1.53782	0.214942	0.932462
HGLibA_20351	ATGAATTCCATCCGCATAGA	GRM4	2.78483	0.659129	0.942879	0.331538	1
HGLibB_20967	GATGTGACCCAGATGGATCA	HCST	2.78465	2.68641	1.15085	0.28337	1
HGLibB_57764	GACGCCTTGCCCGGCTCACA	NonTargetingControlGuideForHuman_0736	2.78454	-0.151753	0.943285	0.331435	1
HGLibB_34338	TTTAAAAGCAACATGAGTGC	OR6C1	2.78447	4.58489	1.71936	0.189775	0.867157
HGLibA_00142	CTGCAGCACGACAGACCAAG	ABCB5	2.78427	3.26872	1.3186	0.250843	1
HGLibB_53283	CGGCTTTGTTTCGCTCCACT	USP37	2.78408	4.62849	1.72566	0.188967	0.865333
HGLibA_19801	GTCGACTCCCGGGGCACAGT	GPHB5	2.78318	2.02736	1.02445	0.311465	1
HGLibA_46422	TTCTTACGAGTAGCAGTTGT	SPAST	2.78233	3.38137	1.35909	0.243695	0.998979
HGLibA_47899	TGCGGTGAAGGCGTGCCAGA	SWAP70	2.7819	1.85691	1.0026	0.316682	1
HGLibB_29745	TCCAGAGTGGACTGATGTAC	MPV17L	2.78113	1.63546	0.980296	0.322126	1
HGLibA_20588	AACACTAGCATCCCCACCCG	GTF3C4	2.78086	2.89852	1.20613	0.272101	1
HGLibA_38549	GCAGATGAGATCCACGTAAC	PRKCG	2.78071	2.54091	1.112	0.291647	1
HGLibA_13873	ACAACACACAGTGGGTCACA	DPP4	2.77804	2.80687	1.17675	0.278018	1
HGLibA_12051	CAGACCTGTTCCGTCTGTTC	CYP11A1	2.77789	2.5424	1.11023	0.292032	1
HGLibA_40401	GGAGTCCCTTCCCCCGATTG	RAVER1	2.77749	1.09352	0.945045	0.330984	1
HGLibB_29614	ATATGATATCAGAATTCCCG	MORC3	2.77727	0.571221	0.936811	0.333099	1
HGLibA_02319	ACATGCTAACTCGATATGCT	AP3B1	2.77662	2.0511	1.02308	0.311789	1
HGLibB_38816	GAAAGGACCTTCATTTAATC	PRRC2C	2.77587	3.00931	1.23444	0.266546	1
HGLibB_57628	ACAAACGACCTTGAGCAGGG	NonTargetingControlGuideForHuman_0600	2.77382	-0.341743	0.939322	0.332452	1
HGLibB_24565	AGCAGGAGCAGCGGTTACTG	KIAA0195	2.77328	1.9973	1.01428	0.313879	1
HGLibA_11496	TAGACATGGGGATCGGATGC	CSTL1	2.77325	2.71779	1.15041	0.283463	1
HGLibB_48786	AGCAGTCAGTTGAATACGAA	TCP11L1	2.77255	2.10272	1.02686	0.310896	1
HGLibA_62117	TGTGGTTTCCAGGGCAACCC	hsa-mir-551a	2.77241	5.28792	1.7481	0.186116	0.858393
HGLibA_02940	AGCCTACCTGTCTGAACCAG	ARL14EP	2.77159	2.61169	1.12261	0.289358	1
HGLibA_00055	ATCGCTGAGCCGCCATACGA	AAMP	2.77141	0.677137	0.934614	0.333667	1
HGLibA_32228	GATTTGTGTGTACCCATAAC	NOA1	2.7714	2.19217	1.03947	0.307944	1
HGLibA_49258	GGCCATTGTGTACCGTCCTA	TGM3	2.77126	2.71296	1.14794	0.283981	1
HGLibB_03612	CCACACACACTACAGACAAG	ATP2B1	2.7708	1.55743	0.967144	0.325393	1
HGLibA_13086	GCGGCCGCACGATGGCCGAG	DGKZ	2.77052	-0.59521	0.939292	0.33246	1
HGLibA_48841	TTTAGCCCGTTCATACTGAA	TCP11	2.77023	4.25015	1.63444	0.201089	0.897349
HGLibA_13118	ATATCAACAACGTCGGACTC	DHRS1	2.77	2.87481	1.19022	0.275286	1
HGLibB_01637	GATGGCCCTCATACTATTTC	ALG9	2.76999	1.52712	0.963958	0.326192	1
HGLibA_05548	CCGAGTCCACATGTTAGCCC	C17orf58	2.76984	2.38457	1.07369	0.300113	1
HGLibA_46352	TGGATTTGGTTGCATATCTA	SPAG16	2.76976	2.66407	1.13444	0.286829	1
HGLibB_39872	TAAAGACTTACAGGTTCTTG	RAB3GAP2	2.76952	1.85436	0.99433	0.318686	1
HGLibB_49956	CGTGCAACATCAGCGTGCAG	TMEM158	2.76902	3.58486	1.41859	0.233635	0.976976
HGLibA_19399	AAGAGAGCCATCCGCATGAA	GMEB2	2.76862	0.996389	0.937078	0.33303	1
HGLibB_16917	AGCTCTCATCCCCAATGCAC	FBLIM1	2.7684	1.39447	0.95282	0.329002	1
HGLibB_06460	AGGCCTGACAGCAACCGCAG	C6orf195	2.76832	1.98043	1.00908	0.315124	1
HGLibA_12538	TCTCTTCTTCGCGAGATCTA	DCT	2.76816	4.84291	1.72658	0.188848	0.865003
HGLibB_39062	CTTTCCAGGCCTCTACTACG	PSMB5	2.7681	1.83298	0.990807	0.319545	1
HGLibA_03348	GGGCAACCAAGGTAGACGCT	ASPG	2.76797	2.29761	1.05627	0.304068	1
HGLibB_10731	GGTGGCTGCCCGACGCTCAA	COQ10A	2.76745	1.0211	0.936726	0.333121	1
HGLibB_13230	TTGACCTTACCTTGAATAAG	DIP2A	2.76711	1.5687	0.965939	0.325695	1
HGLibB_46807	GCTGAGCTGTGACAACCGTA	SPSB3	2.76657	1.6667	0.973985	0.323688	1
HGLibB_12996	GTACAATATGGTGACGACAG	DET1	2.76645	1.91495	0.99975	0.317371	1
HGLibA_10567	TGTGGCAAATGTGACTGCCA	COL4A1	2.76628	7.28384	1.70904	0.19111	0.870752
HGLibB_33088	ACGAAATCCGTATTACCACG	NXF2B	2.76586	2.57072	1.1088	0.292343	1
HGLibB_04177	GAAGGCTGACAAGCTCCATG	BATF3	2.76487	2.47873	1.08793	0.296929	1
HGLibB_48815	CGTGACTGTGATCCCCGGTG	TCTN2	2.76404	4.62599	1.70335	0.19185	0.872882
HGLibB_06603	TCTGCAGGCCTCGCTCTATA	C8orf33	2.76388	2.37461	1.06781	0.301441	1
HGLibB_26147	CTGCCGGTCCAGCTCCTCCA	LCN8	2.76365	1.7232	0.977035	0.322932	1
HGLibA_34325	CATGTCTCAGAAGCTGCGTG	OR5L2	2.76311	1.61327	0.967206	0.325378	1
HGLibB_01855	GGTACAGGTCAGACAGTGTG	AMZ1	2.76286	3.59348	1.41715	0.233873	0.977435
HGLibB_15861	TTGGCTTAGCGATGTTGAAA	F8	2.76144	2.64465	1.12367	0.289129	1
HGLibB_01089	CCGAGGGCGGGTAAGCGAGC	AEN	2.76133	-0.329956	0.932485	0.334218	1
HGLibB_39924	AGTTCCACCATGTCCGCGGG	RAB6C	2.76091	1.28657	0.943586	0.331357	1
HGLibB_31453	CACAACCAAGATCCAAAGCA	NDUFAF5	2.7604	-0.472141	0.931873	0.334377	1
HGLibA_06267	TTGCTAGCCAAGCACCGCAG	C3orf72	2.75974	2.85211	1.17711	0.277946	1
HGLibA_22453	GAGACAGGCGGCCTTCCGAG	HYI	2.75925	1.32685	0.944188	0.331203	1
HGLibA_64840	GCCACACGAATCATAAAGAG	NonTargetingControlGuideForHuman_0457	2.75809	2.869	1.18024	0.277307	1
HGLibA_47342	CACAGGAGTATGAGCATTAC	STAP1	2.75808	1.70068	0.971595	0.324283	1
HGLibB_42686	TGGATTGTGCAGACCACGAA	SAR1B	2.75779	1.86594	0.988273	0.320165	1
HGLibB_08863	CCTAGACTTGCACCTAGCTG	CDR2L	2.75755	1.10706	0.933617	0.333925	1
HGLibA_19748	GAGTGATACCATTCTCCTTC	GPATCH4	2.75754	2.32873	1.05495	0.304369	1
HGLibA_44185	TACCTTGGCGGGTGCAGACA	SIN3B	2.75722	2.30757	1.05084	0.305314	1
HGLibB_54628	ACCCTACCTGGTATCTACTG	YKT6	2.75703	-0.493375	0.929732	0.334933	1
HGLibA_58481	TCTTCAGCTGATGTTTTCCA	hsa-mir-30c-1	2.75635	1.44193	0.948265	0.330161	1
HGLibA_45963	TCGTGGAGCGGGACCGCAAG	SNRPA	2.75622	0.431453	0.922404	0.336844	1
HGLibA_49095	CCTAACAAGAGCTTAACATA	TEX30	2.75617	1.54635	0.957225	0.327887	1
HGLibB_57259	GATGGCGCGCAGTTGAGTCA	NonTargetingControlGuideForHuman_0231	2.75586	0.00982618	0.924112	0.336398	1
HGLibA_32993	ACCAGTCCAGTCCGTCCTGC	NUDT9	2.75532	2.64145	1.11808	0.290332	1
HGLibB_34478	CCTCCGCATTCGCTACACTG	OR8G5	2.755	2.39303	1.06511	0.302053	1
HGLibA_38259	CTGACCTTGCAAGCAAGCAT	PRAC	2.75443	2.96382	1.20458	0.272408	1
HGLibA_16013	AGCGTTGCAAACCCGGCGGC	FAM110A	2.7542	2.79084	1.15607	0.282283	1
HGLibA_24891	CCCCTGCCGTCATGTCGCAA	KIF20A	2.75411	1.32026	0.940856	0.332058	1
HGLibA_60070	GCTGAGAGTTGAACACTTGT	hsa-mir-4421	2.75389	2.72252	1.13789	0.286099	1
HGLibA_63023	GCTCAAACCGGCTGTGCCTG	hsa-mir-6715b	2.75287	0.19398	0.92046	0.337354	1
HGLibA_07859	ACTTCAAGAAAGACTCAACA	CCDC73	2.75266	0.791044	0.92493	0.336184	1
HGLibB_00091	CATCAACCAGGTAATTGCCT	ABAT	2.75127	6.13119	1.72289	0.189322	0.865723
HGLibA_52723	GTGGGAAACCCCGTAAACAC	UBN2	2.75064	1.05992	0.927265	0.335575	1
HGLibA_32537	ACTACATGTACGCCCGCGTG	NPTXR	2.74978	0.991545	0.925521	0.336029	1
HGLibB_22083	GCAGGCTGTGACTTCACTAA	HRSP12	2.74819	3.46834	1.35977	0.243578	0.998875
HGLibB_07963	AGAAACTGGGGGGAAACCGA	CCL14	2.74758	1.74226	0.968531	0.325047	1
HGLibA_52666	CCTAGAAAATTTCACTGCAA	UBE2V1	2.74751	3.03612	1.22012	0.269337	1
HGLibA_60021	AGCTGAGACCCTTAACAAAG	hsa-mir-4324	2.74748	-1.23086	0.928595	0.335228	1
HGLibA_28999	AAGCCGGTTCCTGAGAGATC	METTL2A	2.74703	2.5545	1.09145	0.296151	1
HGLibB_52897	AGACTGTATAGGATGGCTTG	ULBP2	2.74699	3.119	1.24455	0.264595	1
HGLibB_01124	ACTAGCAACCATGAAGTGGG	AFP	2.74604	1.66392	0.960912	0.326957	1
HGLibB_30632	GGACCGGCTCCCCGCCGGCT	MYCL	2.746	-1.2796	0.931052	0.33459	1
HGLibB_30619	TCACCTGGAATGGGATTAGT	MYBPHL	2.74526	2.62791	1.10784	0.292552	1
HGLibB_35784	CGTGTGCTCGGAGGGATTTG	PDE8B	2.74463	3.2154	1.27284	0.259235	1
HGLibB_56290	TCCCCGAAGAGGCTGAAAGG	ZNF598	2.74436	1.92309	0.986503	0.320599	1
HGLibA_52509	TCCGTCTGCAGACGGCAACG	UAP1L1	2.74425	1.28776	0.933646	0.333917	1
HGLibB_44744	AGGCTTAGCCTTTGCAATGC	SLC26A5	2.74297	6.29319	1.71056	0.190913	0.87014
HGLibA_36093	GCTAGGTCGACTGACAGTTC	PEX12	2.74233	3.12445	1.24266	0.264959	1
HGLibA_42140	AAGCTACTTACTGGTTCCTT	RPS3A	2.74193	0.46438	0.914417	0.338945	1
HGLibA_00805	CGCGGAGCCTTTGGCTACCG	ADAMTS15	2.74166	1.21279	0.928691	0.335203	1
HGLibA_14236	ACGGGTAATTGAAAGAGCCC	DYNC1I1	2.74059	2.08861	1.00406	0.316331	1
HGLibA_35880	ACTTGCCCCCGAGTATGAGA	PDIA4	2.74041	2.14688	1.01106	0.314649	1
HGLibB_15035	GTGTTACCAAAGAAACCTAC	EML1	2.74019	2.4454	1.06461	0.302167	1
HGLibB_52421	ACTTTGTGTAAAAGATGATG	TYW3	2.73981	3.71354	1.43622	0.230752	0.969819
HGLibB_27012	TGGCGCTCATTTCTTTGTCG	LPAR1	2.73945	0.19255	0.912456	0.339464	1
HGLibA_39330	AACTTACCTGAATGTAAGTT	PTGES3	2.73808	3.49404	1.35974	0.243582	0.998875
HGLibA_29217	GATAGTGGAGGCTTCCGGGC	MICALL2	2.73761	1.4035	0.934486	0.3337	1
HGLibA_26142	GTGGGGGTTGGCACTGCTTC	LCE3E	2.73745	2.74675	1.13212	0.287324	1
HGLibA_16454	GTCCACGCCGCCACCCGTCA	FAM210A	2.73735	1.84242	0.972411	0.32408	1
HGLibA_31987	TGCAGCATATATCTCATTGG	NIT2	2.73729	-0.0829304	0.913859	0.339093	1
HGLibB_25418	GAGAAGAATAATCTGAGCAT	KRT23	2.73694	1.0686	0.919167	0.337694	1
HGLibA_36039	TAGCGACACAGACATGTTCC	PELI3	2.7358	2.43599	1.05957	0.303313	1
HGLibA_16882	AACGCACCACTCGGAACACC	FARSA	2.73559	3.0166	1.20518	0.272289	1
HGLibB_55013	CCACTTGTCCTACACAGACA	ZDHHC15	2.73549	3.47814	1.352	0.244929	1
HGLibB_37654	AGGATCAGAGTGACAGTTGA	POPDC3	2.73523	2.99714	1.19751	0.273821	1
HGLibB_16735	GGGGAACTGAGTTCTTCACG	FAM83G	2.7352	2.59352	1.0924	0.295939	1
HGLibB_00036	CATATGCTCTCGTTTGTGCA	AADACL3	2.73446	1.77653	0.963003	0.326431	1
HGLibA_25588	CCGCCCAGACAGTCGTGTGG	KRTAP1-5	2.73341	2.58038	1.08801	0.296913	1
HGLibB_07095	TACTTTACAACTTGCGTACA	CAMLG	2.73322	3.27232	1.28193	0.257541	1
HGLibA_04016	CTTCCACAGGGTACGGCAGC	B4GALNT3	2.73316	1.23982	0.924603	0.336269	1
HGLibA_26093	TGAACTGCAGAGCCTTTAGC	LCA5L	2.73201	1.10583	0.918225	0.337942	1
HGLibA_24406	ATGAGTATACCACCATACGC	KCNV2	2.7319	4.96002	1.69091	0.193481	0.877739
HGLibB_36633	GAGCTTCGAGAAGGCGTACC	PIM3	2.73166	2.74975	1.1286	0.288074	1
HGLibB_32277	TGCAGAGATGAGCGCAAAAC	NOP9	2.73139	1.40547	0.930651	0.334694	1
HGLibB_47042	TTCGCTGCAGAGTACCGAAG	SRY	2.73119	0.0916992	0.908942	0.340395	1
HGLibA_35793	GTTCATAGTCGCTATCTGAG	PDE4C	2.73097	0.269482	0.907135	0.340876	1
HGLibA_08086	CTGATCCCCCCAGATAATAC	CCNE2	2.7307	5.4247	1.70677	0.191405	0.871428
HGLibA_45555	CATTACCCGCTGCAAGCCAG	SLURP1	2.72926	2.28963	1.02866	0.310474	1
HGLibA_39520	CACCCAGTATGTGATCTCTC	PTPRN	2.72892	2.84853	1.15287	0.282949	1
HGLibA_62337	TGAAGGCCTGGGGTGCCCAA	hsa-mir-5700	2.72862	2.3838	1.04537	0.306575	1
HGLibA_06065	AATGTGGTCAAACATAGCTT	C22orf28	2.7282	2.76712	1.13005	0.287764	1
HGLibA_40618	ACCCAGGTGCCCTTCTTGTG	RBMY1D	2.72701	0.691117	0.908521	0.340507	1
HGLibB_32640	CTAGATCACGAAGAGCCCTG	NRG4	2.72689	2.10105	0.996811	0.318083	1
HGLibA_25199	GCTCTTCTGCGACGTCGTCC	KLHL36	2.72674	1.75189	0.956353	0.328108	1
HGLibB_24271	GAAGTTCGGCTTCTCGGCCG	KCNK15	2.72644	2.79161	1.13568	0.286567	1
HGLibA_34532	ACACAGTTATTATGCCCAAA	OR8H3	2.72627	1.00697	0.911901	0.339611	1
HGLibA_57668	AAGTTAGGTGTTTATCTCTA	hsa-mir-1297	2.72602	-0.425335	0.910796	0.339903	1
HGLibB_27295	AACTAACTTACAAATACTGG	LRRC37B	2.72529	1.00671	0.911454	0.339729	1
HGLibA_09576	GTAGTTTGCCGGTGGAGTCC	CHRNA5	2.72502	1.76771	0.95665	0.328032	1
HGLibB_28316	CACCTGGCCGTTGGCCTTCG	MARCKSL1	2.72491	2.58577	1.08336	0.297947	1
HGLibA_39971	CACAGATCAGGCTTCAGCTG	RAB6A	2.72471	1.41329	0.926829	0.335688	1
[truncated: 119,540 more rows]

## Sheet: Table_1_B_Ranked Hits
num	Gene	logFC	logCPM	PValue	logpv	status	transcription	cytoskeletal	secretory
121539	PLEKHA5	10.6786	1.73838	0.00452372	2.3445	secretory
121538	RANBP3L	10.5788	1.4245	0.00525748	2.27922	none
121537	APBB3	10.3841	1.28718	0.00587788	2.23078	none
121536	PRDX5	10.3145	1.32347	0.00603031	2.21966	none
121535	C9orf139	9.94475	0.826187	0.00751969	2.1238	none
121534	TAS2R30	9.78697	0.688737	0.00812091	2.0904	none
121533	FBXL15	9.66461	0.452945	0.00867051	2.06196	none
121532	hsa-mir-6510	9.55078	0.518153	0.00909746	2.04108	none
121531	MTMR2	9.24398	1.13364	0.0101008	1.99564	secretory
121530	ETV7	9.21837	-0.0134126	0.0105305	1.97755	transcription
121529	SNRPE	9.21837	0.00492899	0.0105374	1.97727	none
121528	KDELR2	9.11131	1.87593	0.0127461	1.89462	secretory
121527	GOLGA8O	9.06205	0.0901393	0.0113427	1.94528	secretory
121526	UNC45A	8.97638	1.82254	0.0140114	1.85352	none
121525	NKX2-2	8.88548	-0.236215	0.0121472	1.91552	transcription
121524	SH3BGR	8.80566	2.22896	0.0129867	1.8865	none
121523	ZNF544	8.73003	1.69577	0.0164013	1.78512	transcription
121522	KRTAP3-3	8.72977	1.36527	0.0178433	1.74853	none
121521	FAM76B	8.71978	0.783395	0.0131003	1.88272	none
121520	hsa-mir-4765	8.71506	-0.458494	0.0130311	1.88502	none
121519	CALM2	8.69908	1.27537	0.0183324	1.73678	none
121518	TRPV2	8.68062	2.04196	0.0151562	1.81941	none
121517	CCDC61	8.572	-0.59579	0.0138832	1.85751	cytoskeletal
121516	C8orf47	8.55258	1.19833	0.0198355	1.70256	none
121515	SFSWAP	8.53724	-0.604067	0.0141002	1.85077	none
121514	ZNF680	8.50411	1.18155	0.0203357	1.69174	transcription
121513	GALNT2	8.49889	-0.656276	0.0143377	1.84352	secretory
121512	ALDH2	8.49202	-0.607704	0.0143983	1.84169	none
121511	NDUFAF3	8.4503	1.04135	0.0146808	1.83325	none
121510	NR1D1	8.35642	0.943355	0.0220837	1.65593	transcription
121509	TMEM110	8.27019	-0.475984	0.0159743	1.79658	secretory
121508	TM9SF4	8.14867	-0.634393	0.0168458	1.77351	secretory
121507	TBR1	8.12867	1.42454	0.0239383	1.62091	transcription
121506	RPLP2	8.10471	0.688575	0.0252293	1.59809	none
121505	LOC646862	8.06436	-0.439615	0.0175713	1.7552	none
121504	H3F3A	7.93615	1.81187	0.0240667	1.61858	none
121503	FREM3	7.90783	0.457915	0.0278701	1.55486	cytoskeletal
121502	AIFM2	7.73517	1.00218	0.0303576	1.51773	none
121501	MFRP	7.69154	0.770401	0.0302222	1.51967	none
121500	ZNF469	7.66008	0.675731	0.0307725	1.51184	transcription
121499	CTCFL	7.61355	-1.04129	0.0214617	1.66834	transcription
121498	SYS1	7.60986	0.0702223	0.021997	1.65764	secretory
121497	OTUB2	7.47701	0.20533	0.0340717	1.46761	none
121496	KPNA6	7.42497	0.237786	0.0346699	1.46005	none
121495	FGF11	7.40032	-0.0551409	0.0347803	1.45867	none
121494	MYOG	7.38796	2.00531	0.0297234	1.5269	none
121493	KRTAP4-6	7.38225	-1.49981	0.0237929	1.62355	none
121492	hsa-let-7a-3	7.38225	-1.48686	0.0237955	1.62351	none
121491	CHST4	7.31108	4.01859	0.00758692	2.11993	none
121490	MPZ	7.30594	-0.0199192	0.0366682	1.43571	none
121489	DSCR3	7.28717	1.10632	0.0359587	1.4442	secretory
121488	ERF	7.23103	-0.0360345	0.0376676	1.42403	transcription
121487	ARPC4-TTLL3	7.22959	0.104899	0.037841	1.42204	cytoskeletal
121486	PIP5K1C	7.22363	-0.149906	0.0379636	1.42063	secretory
121485	HOXA4	7.22358	0.321598	0.0384586	1.41501	transcription
121484	DYM	7.21809	0.84682	0.0376004	1.42481	secretory
121483	NFE2L3	7.20135	0.130416	0.0383697	1.41601	transcription
121482	LDHA	7.18931	0.95488	0.0379912	1.42032	none
121481	C16orf97	7.14639	1.08599	0.040163	1.39617	none
121480	LHX4	7.14002	0.793137	0.0390757	1.40809	transcription
121479	CCDC42B	7.0578	1.0481	0.041623	1.38067	cytoskeletal
121478	RPL30	7.03283	0.669635	0.0427338	1.36923	none
121477	PTPRC	7.01254	1.19261	0.042435	1.37228	none
121476	COL5A1	7.00902	-0.293773	0.0414924	1.38203	cytoskeletal
121475	DCDC2B	6.944	0.549982	0.0435005	1.36151	cytoskeletal
121474	TEAD1	6.93592	1.71776	0.0406225	1.39123	transcription
121473	TMEM106B	6.93579	0.153606	0.0434623	1.36189	secretory
121472	KCNK9	6.87617	1.24801	0.0443749	1.35286	none
121471	RTN2	6.86749	0.140208	0.0461901	1.33545	secretory
121470	hsa-mir-1254-1	6.83957	1.22113	0.0456377	1.34068	none
121469	hsa-mir-346	6.82967	-0.929131	0.0310814	1.5075	none
121468	RRN3	6.80426	1.9646	0.0404641	1.39293	transcription
121467	ARHGAP33	6.77559	1.93985	0.0408841	1.38845	secretory
121466	TMEM128	6.76149	0.317117	0.0477298	1.32121	none
121465	REV1	6.67355	-0.00449692	0.0489693	1.31008	none
121464	TSHR	6.64356	0.470475	0.0514667	1.28847	none
121463	hsa-mir-4686	6.63511	2.30003	0.039336	1.40521	none
121462	DNAAF2	6.62421	1.70604	0.0474723	1.32356	none
121461	H2AFJ	6.60337	2.05743	0.0436827	1.35969	none
121460	ART5	6.59625	1.0188	0.0528017	1.27735	none
121459	TMF1	6.59615	1.62671	0.0485429	1.31387	none
121458	ANO8	6.58193	1.92256	0.045812	1.33902	secretory
121457	LYPD3	6.57338	1.38297	0.0515637	1.28766	none
121456	CBX4	6.57282	1.35348	0.0518448	1.2853	none
121455	PTPN3	6.57235	0.545313	0.0531	1.27491	none
121454	EVI2A	6.57041	0.990622	0.0533848	1.27258	none
121453	TSACC	6.55264	-0.704618	0.0515158	1.28806	none
121452	PPP1CB	6.50695	-0.60524	0.0527144	1.27807	none
121451	INHBE	6.49185	1.1975	0.0544385	1.26409	none
121450	WNK1	6.49068	1.5851	0.0518806	1.28499	none
121449	NCL	6.47339	-0.646696	0.0369198	1.43274	none
121448	RPS11	6.47126	0.704301	0.0562146	1.25015	none
121447	EPO	6.40524	1.69312	0.053123	1.27472	none
121446	KLHL9	6.35545	0.833385	0.0565337	1.24769	none
121445	SLC35D2	6.31664	0.461772	0.0609737	1.21486	none
121444	ZNF676	6.30577	-1.87006	0.0395895	1.40242	transcription
121443	APOBEC1	6.30574	0.571004	0.0404826	1.39273	none
121442	hsa-mir-6878	6.29662	1.61482	0.0567278	1.2462	none
121441	hsa-mir-125b-1	6.24717	0.219286	0.0619945	1.20765	none
121440	PAPSS2	6.23834	1.94071	0.0541344	1.26653	none
121439	CSF3	6.23585	1.16534	0.0621261	1.20673	none
121438	MCEE	6.17688	-0.231318	0.0634198	1.19778	none
121437	COPS5	6.16405	-0.185221	0.0640699	1.19335	none
121436	CALB2	6.12631	0.891973	0.0663877	1.17791	none
121435	GALR2	6.11968	0.662356	0.0664286	1.17765	none
121434	SNAP29	6.11048	3.02571	0.0358484	1.44553	secretory
121433	NonTargetingControlGuideForHuman_0798	6.09974	1.06325	0.0669376	1.17433	none
121432	CBLN2	6.06911	0.213577	0.0685272	1.16414	none
121431	NOL11	6.04812	1.46261	0.0659684	1.18066	none
121430	SIAH1	6.04422	0.877899	0.0691575	1.16016	none
121429	OR52E2	6.04054	0.438923	0.0695276	1.15784	none
121428	TG	6.02879	1.29338	0.0678911	1.16819	none
121427	HOXB2	6.02104	-0.0648966	0.069659	1.15702	none
121426	ATAD5	6.01819	2.62644	0.0474631	1.32364	none
121425	SLC45A2	6.00484	0.171422	0.070635	1.15098	none
121424	IGFBPL1	5.97814	0.902817	0.0699433	1.15525	none
121423	ITGA3	5.94699	0.827864	0.0724888	1.13973	none
121422	ATP6V1F	5.94694	0.699412	0.0725796	1.13919	none
121421	ATXN7L3	5.93798	2.29219	0.0570335	1.24387	none
121420	MRPL36	5.91512	0.485901	0.074104	1.13016	none
121419	ZNF728	5.9087	-0.20207	0.073154	1.13576	none
121418	CENPC1	5.86769	-0.0601432	0.074705	1.12665	none
121417	SEC22C	5.8667	0.65465	0.0756903	1.12096	none
121416	hsa-mir-548ab	5.84622	0.35373	0.0766853	1.11529	none
121415	EPN1	5.84238	1.33633	0.0738588	1.1316	none
121414	hsa-mir-378f	5.84056	0.155709	0.0766667	1.11539	none
121413	FARSA	5.83801	-0.135204	0.0756418	1.12124	none
121412	GRIA2	5.81435	2.22574	0.0612688	1.21276	none
121411	PIGO	5.76044	1.37139	0.0765075	1.1163	none
121410	MRPS5	5.7547	2.59681	0.0557664	1.25363	none
121409	SLC2A13	5.74077	1.41237	0.0773741	1.1114	none
121408	hsa-mir-4999	5.73849	1.92013	0.0702763	1.15319	none
121407	hsa-mir-4779	5.73636	1.45446	0.077002	1.1135	none
121406	ZNF621	5.73122	0.772914	0.0769061	1.11404	none
121405	C2CD3	5.72543	2.83686	0.0498391	1.30243	cytoskeletal
121404	PRR20A	5.69249	-2.01183	0.0534315	1.2722	none
121403	NR5A1	5.68444	-0.123697	0.0814411	1.08916	none
121402	FPGS	5.66737	2.56149	0.0594912	1.22555	none
121401	NonTargetingControlGuideForHuman_0289	5.646	0.146816	0.0837363	1.07709	none
121400	hsa-mir-4436b-2	5.63991	-1.69086	0.0548574	1.26077	none
121399	NonTargetingControlGuideForHuman_0871	5.63493	0.776314	0.0843403	1.07396	none
121398	SRP9	5.63403	0.291793	0.085015	1.0705	none
121397	MARCKSL1	5.63073	3.49211	0.0360907	1.4426	cytoskeletal
121396	ANKRD9	5.61152	0.893926	0.0844244	1.07353	none
121395	COMTD1	5.60703	0.955362	0.0850511	1.07032	none
121394	MYOD1	5.5818	1.32073	0.084186	1.07476	none
121393	OTUD4	5.5771	-0.77201	0.0843576	1.07388	none
121392	RAB31	5.5741	2.40055	0.0665609	1.17678	none
121391	CPNE4	5.56795	0.987796	0.0864367	1.0633	none
121390	IL9	5.56597	0.892036	0.0866528	1.06222	none
121389	NKX6-3	5.55644	-1.55777	0.0825207	1.08344	none
121388	HIST1H4H	5.54473	2.81774	0.0563701	1.24895	none
121387	GTF3C4	5.53085	1.49099	0.0846982	1.07213	none
121386	SPAG11A	5.52289	1.78468	0.0811599	1.09066	none
121385	METTL9	5.51458	1.9168	0.0788143	1.10339	none
121384	COA6	5.50173	2.20332	0.07305	1.13638	none
121383	HADHB	5.49142	0.751308	0.0904508	1.04359	none
121382	FAM209B	5.47389	1.04261	0.0908364	1.04174	none
121381	GABRA5	5.46206	1.0121	0.0908934	1.04147	none
121380	TFDP2	5.45817	0.545438	0.0917181	1.03755	none
121379	GGT6	5.44466	1.39552	0.0892547	1.04937	none
121378	ARL4C	5.43771	0.968503	0.0922757	1.03491	none
121377	OR52R1	5.43698	2.0447	0.0798871	1.09752	none
121376	POLE2	5.42809	-0.683115	0.0901653	1.04496	none
121375	hsa-mir-888	5.42649	2.36895	0.0727191	1.13835	none
121374	ZNF430	5.4194	2.22214	0.0769117	1.11401	none
121373	SFR1	5.41632	3.33412	0.0458309	1.33884	none
121372	MS4A12	5.41512	1.5213	0.0892254	1.04951	none
121371	ZNF12	5.40139	0.994288	0.0940934	1.02644	none
121370	MRPL18	5.40075	0.906523	0.0941349	1.02625	none
121369	PGLYRP1	5.39913	2.02181	0.0819334	1.08654	none
121368	NonTargetingControlGuideForHuman_0747	5.3989	0.427023	0.0945207	1.02447	none
121367	HAUS4	5.39793	2.62317	0.0671533	1.17293	none
121366	TCEB3C	5.38957	-2.42962	0.0620031	1.20759	none
121365	RASGEF1A	5.37239	1.84401	0.0864287	1.06334	none
121364	APOBEC3B	5.36949	-0.388215	0.0930503	1.03128	none
121363	SMIM10	5.36727	1.40223	0.0928071	1.03242	none
121362	OR4F15	5.36694	0.853652	0.0954207	1.02036	none
121361	C1QL2	5.3648	-0.241914	0.0918154	1.03708	none
121360	hsa-mir-548ax	5.36479	-0.124467	0.0920307	1.03607	none
121359	NDUFS6	5.35695	2.80924	0.0614638	1.21138	none
121358	CCDC63	5.35348	1.29033	0.0941934	1.02598	none
121357	SLC25A14	5.34979	2.26547	0.0786295	1.10441	none
121356	SLCO2B1	5.34837	1.17774	0.0955431	1.0198	none
121355	SETMAR	5.33981	0.20756	0.0978691	1.00935	none
121354	DOCK1	5.339	0.976019	0.0970372	1.01306	none
121353	PRKCDBP	5.33707	-0.752658	0.0944887	1.02462	none
121352	RGMA	5.33634	0.368118	0.0977845	1.00973	none
121351	ALG2	5.33611	1.36134	0.0943094	1.02544	none
121350	GYG2	5.32598	-0.431161	0.0646842	1.1892	none
121349	MCEE	5.32182	1.05903	0.0973055	1.01186	none
121348	DISP1	5.31326	2.67917	0.068854	1.16207	none
121347	ZCCHC9	5.30726	2.22889	0.0813062	1.08988	none
121346	SLC26A11	5.29381	-0.379055	0.094706	1.02362	none
121345	LUZP2	5.29188	1.54965	0.0945205	1.02447	none
121344	MAGEH1	5.29177	0.757847	0.0989374	1.00464	none
121343	TBC1D3H	5.28745	1.22021	0.0978126	1.00961	none
121342	EVPL	5.28471	1.34531	0.0960758	1.01739	none
121341	TCFL5	5.28381	0.862439	0.0997749	1.00098	none
121340	MC3R	5.26985	0.926524	0.100214	0.99907	none
121339	MAP4K1	5.26316	1.03053	0.100591	0.997441	none
121338	hsa-mir-744	5.25277	-0.292811	0.0960974	1.01729	none
121337	ATG16L2	5.25258	1.585	0.0957797	1.01873	none
121336	SUPT16H	5.25258	1.00881	0.100874	0.996222	none
121335	RHBDD3	5.25228	2.42291	0.0787415	1.1038	none
121334	LGALS1	5.24532	0.805442	0.101476	0.993637	none
121333	PFDN6	5.2453	0.290032	0.102546	0.989082	none
121332	SALL2	5.24528	2.72557	0.0700612	1.15452	none
121331	SNRNP25	5.22609	1.39051	0.0993411	1.00287	none
121330	ASXL2	5.2208	0.513277	0.103426	0.985371	none
121329	ECHDC3	5.20879	-0.760869	0.0977085	1.01007	none
121328	NEK6	5.20814	2.66371	0.0735524	1.1334	none
121327	DHX16	5.19728	0.188056	0.104524	0.980783	none
121326	ZNF627	5.18735	0.535955	0.105303	0.97756	none
121325	KLF10	5.18661	0.78714	0.104733	0.979917	none
121324	JHDM1D	5.16166	3.0557	0.0628252	1.20187	none
121323	ALDH1B1	5.15367	-0.756599	0.104316	0.981649	none
121322	HSPB9	5.14078	-0.0476154	0.106369	0.973186	none
121321	NonTargetingControlGuideForHuman_0678	5.14044	0.89546	0.106952	0.970812	none
121320	hsa-mir-6862-2	5.13431	0.944983	0.107258	0.96957	none
121319	TCP1	5.13172	1.91574	0.0961272	1.01715	none
121318	hsa-mir-595	5.12193	1.33897	0.105206	0.97796	none
121317	CSNK1D	5.12133	0.532653	0.108377	0.965063	none
121316	hsa-mir-1299	5.1164	0.310817	0.109106	0.962152	none
121315	BPIFB6	5.11019	0.965025	0.108218	0.965701	none
121314	ATG16L1	5.1087	0.496732	0.109477	0.960678	none
121313	INO80E	5.10598	1.4952	0.104363	0.981455	none
121312	TMEM105	5.09966	1.42104	0.105647	0.976141	none
121311	C20orf202	5.0916	0.554906	0.110149	0.958021	none
121310	ATAD3A	5.07849	1.99191	0.0971827	1.01241	none
121309	TARSL2	5.06607	0.916993	0.11085	0.955266	none
121308	LRRC3C	5.06568	1.45354	0.107135	0.970067	none
121307	MYL7	5.06338	0.070933	0.11144	0.95296	none
121306	SPANXN1	5.06248	0.886636	0.110982	0.954749	none
121305	NCKAP1L	5.05793	2.02811	0.0975473	1.01078	none
121304	CCDC42B	5.04899	-0.0635408	0.111021	0.954594	none
121303	NonTargetingControlGuideForHuman_0096	5.04625	0.184739	0.112705	0.948058	none
121302	NDNF	5.04511	0.748759	0.111686	0.952	none
121301	CHD1L	5.04357	-0.886869	0.109502	0.960579	none
121300	C2orf70	5.03179	1.98258	0.099762	1.00103	none
121299	HBD	5.02619	0.610813	0.11325	0.945962	none
121298	OR2A1	5.01407	-0.714622	0.107444	0.968818	none
121297	hsa-mir-653	5.01404	-1.37412	0.106883	0.97109	none
121296	ITGA11	5.0132	1.75803	0.105259	0.97774	none
121295	OR4C13	4.99428	1.79995	0.105579	0.976421	none
121294	P2RX5	4.99203	1.785	0.105942	0.97493	none
121293	NDUFB4	4.98478	-0.746064	0.0767872	1.11471	none
121292	NonTargetingControlGuideForHuman_0874	4.98453	1.82529	0.105239	0.977823	none
121291	hsa-mir-3156-1	4.97931	0.88391	0.115544	0.937254	none
121290	CBWD3	4.96943	0.819225	0.11628	0.934495	none
121289	EPHX4	4.96597	2.87421	0.0770157	1.11342	none
121288	hsa-mir-4509-1	4.96474	-1.4776	0.0771506	1.11266	none
121287	KIAA1456	4.95979	2.3339	0.0948039	1.02317	none
121286	ATG4A	4.95957	2.40669	0.0927194	1.03283	none
121285	RRH	4.95669	0.910287	0.116908	0.932155	none
121284	ARL11	4.95427	1.53932	0.111652	0.952134	none
121283	CEP68	4.94587	1.68935	0.109995	0.958627	none
121282	C22orf42	4.94557	2.42729	0.0928681	1.03213	none
121281	PIM3	4.94161	1.7689	0.1089	0.962974	none
121280	ITGA5	4.94148	3.93933	0.0448906	1.34785	cytoskeletal
121279	hsa-mir-378f	4.92932	-0.0927321	0.118374	0.926742	none
121278	KCNA2	4.91602	1.54652	0.113801	0.943855	none
121277	SSH1	4.91435	2.58248	0.0896387	1.0475	none
121276	CXorf51B	4.91191	0.409195	0.120451	0.91919	none
121275	NDUFAB1	4.90831	0.7476	0.119937	0.921048	none
121274	SREBF1	4.90368	1.61497	0.113323	0.945683	none
121273	ZAR1	4.88169	2.25157	0.101286	0.994451	none
121272	FAM134B	4.8805	1.58161	0.115071	0.939035	none
121271	HNRNPH1	4.87911	2.24994	0.101444	0.993773	none
121270	WBSCR17	4.87663	1.30425	0.11892	0.924747	none
121269	C22orf26	4.85573	1.91921	0.110274	0.957529	none
121268	ZNF136	4.85269	1.36977	0.119934	0.921058	none
121267	RP2	4.83581	2.8034	0.0856516	1.06726	none
121266	HECW1	4.83496	1.52774	0.118517	0.92622	none
121265	CDC42BPB	4.83005	0.813178	0.124524	0.904748	none
121264	CHST13	4.81646	-0.320529	0.124094	0.906249	none
121263	hsa-mir-1273a	4.81428	1.49534	0.120284	0.919794	none
121262	DRAP1	4.81325	1.21362	0.123506	0.908314	none
121261	PHF6	4.81249	1.80938	0.115366	0.937922	none
121260	RPS8	4.80933	0.861738	0.125669	0.900772	none
121259	ZNF28	4.80288	0.830863	0.125398	0.901709	none
121258	MERTK	4.79833	1.67107	0.118664	0.925681	none
121257	TNIP2	4.79073	2.75287	0.0898215	1.04662	none
121256	NDNF	4.78525	3.64079	0.0588128	1.23053	none
121255	TBC1D16	4.78444	1.63014	0.120067	0.920577	none
121254	hsa-mir-3193	4.78425	0.922119	0.127127	0.895761	none
121253	FAM47B	4.77938	2.27556	0.106171	0.973995	none
121252	KRTAP4-1	4.77161	0.069192	0.128	0.89279	none
121251	PPIP5K2	4.77091	0.298655	0.129221	0.888665	none
121250	CAPZB	4.76543	1.23225	0.12635	0.898426	none
121249	LRRC72	4.76496	0.693483	0.128594	0.89078	none
121248	HIST1H1B	4.7596	2.19163	0.109885	0.959062	none
121247	CD226	4.75664	0.39527	0.130021	0.885987	none
121246	MYL12A	4.74637	2.10721	0.112828	0.947583	none
121245	ATP6V1C1	4.74497	1.57743	0.123399	0.90869	none
121244	TP53RK	4.74486	1.18763	0.127954	0.892946	none
121243	hsa-mir-6843	4.7399	1.75605	0.120765	0.918059	none
121242	MAGED4	4.73591	3.70349	0.0590364	1.22888	none
121241	TRDN	4.73427	1.75472	0.121166	0.91662	none
121240	ZFC3H1	4.73176	1.19131	0.128796	0.890098	none
121239	ZFP36L1	4.71959	1.99976	0.1162	0.934794	none
121238	F2RL2	4.71576	2.85622	0.0899069	1.04621	none
121237	CHAD	4.70935	2.11457	0.114774	0.940157	none
121236	NUSAP1	4.70352	0.92547	0.131571	0.880839	none
121235	MESDC2	4.69711	2.03366	0.117385	0.930389	none
121234	FAM154A	4.69275	2.81848	0.0925305	1.03372	none
121233	OR4F16	4.68997	-0.408832	0.132087	0.879139	none
121232	NGF	4.68892	0.58149	0.133053	0.875976	none
121231	C14orf166	4.68646	1.38565	0.129992	0.886084	none
121230	ICOSLG	4.67084	0.132594	0.13514	0.869216	none
121229	SARS2	4.66974	1.14472	0.132982	0.876206	none
121228	hsa-mir-575	4.65371	1.90644	0.122866	0.910568	none
121227	TEX28	4.63303	2.0265	0.121469	0.915536	none
121226	GAL3ST1	4.63252	2.42106	0.110277	0.957515	none
121225	SGSM2	4.6319	1.84906	0.125475	0.901444	none
121224	SNAPC1	4.62462	2.68371	0.101549	0.993323	none
121223	ZFR2	4.61705	1.81597	0.127198	0.895519	none
121222	SRSF6	4.61476	0.94265	0.137812	0.860714	none
121221	LCE3B	4.61208	1.52501	0.132617	0.877401	none
121220	NonTargetingControlGuideForHuman_0379	4.59207	2.23199	0.118655	0.925713	none
121219	IGFBP4	4.59178	1.12049	0.13841	0.858832	none
121218	FAM53C	4.58859	1.51202	0.134498	0.871286	none
121217	DYDC2	4.58758	-0.344953	0.13808	0.85987	none
121216	MC3R	4.58146	1.11462	0.139266	0.856153	none
121215	CRKL	4.57865	2.35872	0.115393	0.937822	none
121214	ITFG3	4.57277	2.32492	0.116914	0.932132	none
121213	SSBP4	4.56098	1.98667	0.126911	0.896502	none
121212	ZNF479	4.56012	0.693217	0.14208	0.847467	none
121211	TEX9	4.55841	1.83571	0.130515	0.884339	none
121210	SCAMP3	4.55234	1.56276	0.136064	0.866258	none
121209	TSPAN1	4.54002	2.31435	0.119368	0.923114	none
121208	REEP4	4.53427	-0.305315	0.142349	0.846644	none
121207	CCL4	4.53052	2.10442	0.126195	0.898959	none
121206	MTMR6	4.5303	2.07797	0.126932	0.89643	none
121205	GEMIN2	4.52706	2.75413	0.104487	0.980938	none
121204	C20orf197	4.51833	1.54371	0.138559	0.858367	none
121203	HSD3B7	4.51258	2.9288	0.0983945	1.00703	none
121202	C12orf65	4.51104	2.14271	0.126599	0.897571	none
121201	PACSIN2	4.50507	0.973663	0.144886	0.838973	none
121200	RNF167	4.49153	2.24802	0.124233	0.905761	none
121199	GOLGA6L1	4.48685	0.40745	0.147995	0.829754	none
121198	ZNF587B	4.48449	1.66761	0.138633	0.858133	none
121197	NonTargetingControlGuideForHuman_0636	4.48368	2.2161	0.126235	0.898821	none
121196	OCSTAMP	4.47949	1.11687	0.146196	0.835065	none
121195	ARHGEF17	4.47913	1.40927	0.143747	0.842401	none
121194	EWSR1	4.47424	1.98573	0.132722	0.877056	none
121193	ARFGAP1	4.47265	1.61312	0.140586	0.852057	none
121192	RAF1	4.46744	2.27846	0.124793	0.903811	none
121191	TTC28	4.46474	1.08213	0.147727	0.830539	none
121190	ADAMTS18	4.44411	1.82794	0.138592	0.858262	none
121189	UTP6	4.43948	1.40621	0.146572	0.83395	none
121188	SDHAF2	4.43853	-0.364002	0.149358	0.825772	none
121187	POLR3B	4.43775	1.49345	0.145246	0.837896	none
121186	BATF3	4.43568	1.38482	0.147028	0.832599	none
121185	PDE4C	4.4342	4.17404	0.0592314	1.22745	none
121184	PPIAL4A	4.4328	0.52652	0.151494	0.819603	none
121183	AQP6	4.43278	3.12349	0.095212	1.02131	none
121182	PANX2	4.43129	5.80515	0.0502353	1.29899	none
121181	IL12RB2	4.42881	-0.341456	0.148674	0.827765	none
121180	PHRF1	4.42875	-0.110204	0.150409	0.822727	none
121179	MRPL4	4.42044	2.44781	0.122866	0.910568	none
121178	MT1H	4.41887	1.1968	0.1499	0.824199	none
121177	hsa-mir-6074	4.41031	0.231007	0.153446	0.814043	none
121176	CCS	4.40867	0.64426	0.15235	0.817157	none
121175	NonTargetingControlGuideForHuman_0267	4.40734	2.86535	0.107373	0.969104	none
121174	ZNF233	4.40277	1.53553	0.147018	0.832629	none
121173	SHISA5	4.40255	0.904625	0.152752	0.816013	none
121172	EIF3H	4.40041	-0.463543	0.151907	0.818422	none
121171	NonTargetingControlGuideForHuman_0825	4.39272	-2.09195	0.103352	0.985682	none
121170	OR4C3	4.38879	1.06416	0.153338	0.814349	none
121169	FXYD1	4.38699	0.888292	0.154091	0.812224	none
121168	MBTPS2	4.38046	0.727153	0.154919	0.809895	none
121167	OLA1	4.37739	1.49335	0.149658	0.824901	none
121166	ALS2CR8	4.37504	2.57422	0.121389	0.915819	none
121165	LCE1C	4.37184	2.30813	0.130785	0.883442	none
121164	CSRNP2	4.36499	1.57386	0.102284	0.990191	none
121163	hsa-mir-1254-1	4.36482	-1.17169	0.104999	0.978815	none
121162	FAM168A	4.36043	2.24925	0.132566	0.877567	none
121161	LARP4B	4.36023	2.76757	0.114426	0.941474	none
121160	NOP9	4.35532	0.84879	0.155638	0.807884	none
121159	FOXD2	4.34934	3.68259	0.0780641	1.10755	none
121158	MNT	4.34913	0.455744	0.157774	0.801964	none
121157	HMGB4	4.34897	3.48286	0.0858147	1.06644	none
121156	DKK2	4.34789	2.88215	0.11046	0.956793	none
121155	ZNF675	4.34658	0.930955	0.157038	0.803996	none
121154	TMA7	4.34237	2.0807	0.139626	0.855035	none
121153	hsa-mir-1266	4.34136	1.75688	0.147461	0.831324	none
121152	hsa-mir-3179-3	4.33366	1.84427	0.145679	0.836602	none
121151	L3MBTL3	4.33205	2.78123	0.115728	0.936561	none
121150	CDH22	4.3302	1.93106	0.144312	0.840699	none
121149	MEF2BNB	4.31925	2.36836	0.1325	0.877784	none
121148	ASAH1	4.31894	2.24644	0.136577	0.864624	none
121147	SLC44A3	4.31469	1.87854	0.146766	0.833374	none
121146	hsa-mir-6863	4.30713	1.58442	0.153197	0.814751	none
121145	NAT8	4.29974	1.88372	0.147691	0.830645	none
121144	DEFB124	4.29346	2.3316	0.135361	0.868507	none
121143	RPL35	4.2914	0.909909	0.161097	0.792911	none
121142	KRTAP12-4	4.28952	1.40345	0.157617	0.802397	none
121141	SLC26A9	4.28534	2.13008	0.142846	0.845132	none
121140	hsa-mir-575	4.27918	0.955884	0.162024	0.79042	none
121139	KIAA1211	4.27019	3.228	0.100843	0.996354	none
121138	KIF1B	4.26847	0.0692263	0.163869	0.785503	none
121137	DDI1	4.26798	2.04918	0.146046	0.835511	none
121136	LY9	4.26631	3.63471	0.084507	1.07311	none
121135	HSPBAP1	4.26558	2.18942	0.142525	0.84611	none
121134	CARM1	4.26485	1.09198	0.162508	0.789124	none
121133	AP4E1	4.26379	0.386384	0.164895	0.782792	none
121132	BEAN1	4.26316	1.72082	0.154121	0.812138	none
121131	BRD9	4.25588	0.979086	0.163836	0.78559	none
121130	GPR142	4.2469	0.854799	0.165005	0.782504	none
121129	RAB12	4.24277	1.79229	0.154444	0.811229	none
121128	hsa-mir-6881	4.23822	1.31823	0.162518	0.789098	none
121127	DEFB108B	4.23716	0.863104	0.165748	0.780551	none
121126	ADD2	4.23158	1.03916	0.165602	0.780934	none
121125	RABGEF1	4.2276	1.79853	0.155391	0.808574	none
121124	IGLON5	4.2268	1.59904	0.159179	0.798113	none
121123	ARMC3	4.215	0.211327	0.167375	0.776308	none
121122	ZNF292	4.21446	0.943652	0.167224	0.776702	none
121121	LGALS2	4.21164	2.053	0.150087	0.823658	none
121120	LTB	4.21035	2.63652	0.130371	0.884817	none
121119	BTNL8	4.20716	1.93923	0.153358	0.814295	none
121118	hsa-mir-6124	4.20649	2.15228	0.148258	0.828981	none
121117	CCDC144NL	4.20235	0.38593	0.169685	0.770356	none
121116	hsa-mir-4655	4.20159	1.18374	0.166791	0.777828	none
121115	ANO5	4.20127	1.26872	0.165722	0.780621	none
121114	ACSM4	4.2001	3.28323	0.102972	0.98728	none
121113	ZNF91	4.19788	0.432725	0.169389	0.771114	none
121112	GRSF1	4.19702	2.18799	0.147731	0.830528	none
121111	TMEM170A	4.192	1.11053	0.168225	0.77411	none
121110	RFC3	4.19007	1.21106	0.16726	0.776607	none
121109	ST8SIA6	4.18756	-0.342432	0.169202	0.771595	none
121108	ATP8A1	4.18041	0.304985	0.171237	0.766402	none
121107	C4orf6	4.17714	2.26304	0.146674	0.833646	none
121106	EHBP1	4.17693	2.48905	0.138875	0.857377	none
121105	hsa-mir-196b	4.17601	3.83079	0.0825814	1.08312	none
121104	SPINK2	4.17171	0.313797	0.172335	0.763628	none
121103	LIMS3L	4.17164	1.10661	0.170032	0.76947	none
121102	SUMO2	4.17086	2.17874	0.150118	0.823568	none
121101	NonTargetingControlGuideForHuman_0664	4.16887	0.0164511	0.171723	0.765172	none
121100	XPO1	4.16646	0.996573	0.170765	0.7676	none
121099	PTPRU	4.16343	0.365704	0.165487	0.781236	none
121098	SAFB	4.16231	2.06896	0.153812	0.81301	none
121097	COPE	4.1592	-0.221486	0.171893	0.764743	none
121096	PCDHGA10	4.15402	-2.19002	0.16439	0.784125	none
121095	YRDC	4.154	1.14028	0.170769	0.767592	none
121094	HOXB4	4.15189	-0.394691	0.171805	0.764964	none
121093	LCMT2	4.14973	3.05474	0.116535	0.933544	none
121092	PDP1	4.14952	1.43394	0.168309	0.773893	none
121091	DET1	4.14866	2.26564	0.148823	0.827331	none
121090	RPL31	4.14866	1.84876	0.160413	0.794759	none
121089	SYCP3	4.14248	2.10348	0.154498	0.811078	none
121088	PLA2G2F	4.13644	0.905791	0.17392	0.75965	none
121087	ZNHIT6	4.13495	0.22292	0.173012	0.761923	none
121086	C2	4.13433	0.163965	0.174736	0.757618	none
121085	ENKUR	4.13183	1.6504	0.165914	0.780117	none
121084	CTAG1A	4.13072	2.56867	0.13923	0.856268	none
121083	hsa-mir-6851	4.12959	0.441112	0.17534	0.75612	none
121082	hsa-mir-8071-1	4.12951	2.01642	0.157717	0.802122	none
121081	TMEM5	4.12818	1.57434	0.167656	0.775581	none
121080	OR10J3	4.12519	1.80567	0.163483	0.786526	none
121079	hsa-mir-4650-1	4.12375	0.278011	0.175616	0.755435	none
121078	PAQR7	4.1228	4.7124	0.0662511	1.17881	none
121077	PCYT1A	4.11994	1.50994	0.169468	0.770912	none
121076	hsa-mir-4760	4.11947	0.968221	0.174925	0.757149	none
121075	CBFB	4.11613	-2.02935	0.169808	0.770042	none
121074	PRIMA1	4.11281	1.88295	0.162425	0.789346	none
121073	PEMT	4.11016	0.861877	0.176169	0.754071	none
121072	GLCE	4.10203	1.7411	0.166631	0.778244	none
121071	ETFDH	4.10054	2.96121	0.124154	0.906038	none
121070	hsa-mir-4529	4.10019	0.0848343	0.177114	0.751747	none
121069	SNCA	4.0962	2.34733	0.1501	0.823618	none
121068	POGLUT1	4.09496	0.172346	0.178567	0.748198	none
121067	HDHD1	4.09453	0.722394	0.177844	0.74996	none
121066	TSC22D4	4.09369	2.8566	0.129387	0.888108	none
121065	LYL1	4.09336	1.2588	0.175043	0.756855	none
121064	ZRSR2	4.07757	1.02447	0.178546	0.74825	none
121063	HOXA10	4.07607	1.84051	0.166619	0.778275	none
121062	hsa-mir-4790	4.07501	2.78449	0.134042	0.872759	none
121061	PPIL1	4.07491	-0.505918	0.178112	0.749308	none
121060	TP53I11	4.07278	2.23198	0.156127	0.806523	none
121059	MRPS33	4.06878	2.46273	0.148219	0.829097	none
121058	HSD17B3	4.06869	3.15428	0.117758	0.92901	none
121057	DPCR1	4.06764	0.72646	0.179797	0.745216	none
121056	hsa-mir-5091	4.06318	0.597178	0.18054	0.743427	none
121055	hsa-mir-6767	4.05758	0.512816	0.181656	0.74075	none
121054	BOLA3	4.05564	2.94001	0.128492	0.891125	none
121053	ZNF655	4.05301	2.36473	0.152948	0.815455	none
121052	RGS7	4.04901	2.05687	0.163292	0.787036	none
121051	ZNF585B	4.04734	-0.181171	0.181048	0.742206	none
121050	CPO	4.04287	1.96114	0.166253	0.779232	none
121049	hsa-mir-494	4.04284	1.91928	0.167432	0.776162	none
121048	APC	4.04076	0.738464	0.182452	0.738851	none
121047	GRIK3	4.04017	1.75105	0.171766	0.765064	none
121046	PNPLA2	4.03909	6.06387	0.0688696	1.16197	none
121045	MRPS11	4.03854	1.73821	0.172144	0.764109	none
121044	CASR	4.03608	0.847113	0.182543	0.738635	none
121043	hsa-mir-4742	4.0345	2.53271	0.148381	0.828623	none
121042	ZNF674	4.03313	3.26435	0.115331	0.938054	none
121041	hsa-mir-4697	4.03181	0.486193	0.183856	0.735521	none
121040	C20orf24	4.03178	-0.00108813	0.18317	0.737146	none
121039	ZNF546	4.03089	2.61039	0.145306	0.837716	none
121038	KRTAP9-8	4.03023	0.784996	0.183287	0.736869	none
121037	B3GNT9	4.02975	-1.33195	0.178622	0.748064	none
121036	ERLEC1	4.02741	1.3705	0.179362	0.746269	none
121035	OR2T11	4.02655	2.6049	0.145885	0.83599	none
121034	STK31	4.02625	1.69534	0.173903	0.759692	none
121033	DIDO1	4.02555	2.21496	0.160617	0.794208	none
121032	RPL7	4.0216	1.43274	0.179459	0.746034	none
121031	RSAD2	4.02134	4.4511	0.0751276	1.1242	none
121030	XIAP	4.02005	1.52734	0.17749	0.750827	none
121029	TRPV6	4.01469	1.66419	0.175575	0.755538	none
121028	SHE	4.01395	2.02119	0.167214	0.776727	none
121027	FAM65A	4.01224	0.314035	0.186053	0.730362	none
121026	ADA	4.01121	2.806	0.138066	0.859912	none
121025	POLR2D	4.01113	3.52632	0.1054	0.977158	none
121024	OR4F29	4.00125	-1.64685	0.181962	0.74002	none
121023	YAF2	4.0004	0.122879	0.186562	0.729178	none
121022	HRK	3.99822	2.18522	0.163989	0.785185	none
121021	NABP1	3.99628	2.09222	0.16697	0.777361	none
121020	PFKFB1	3.99452	-0.173297	0.186043	0.730386	none
121019	C1orf186	3.99195	2.69611	0.144691	0.839558	none
121018	EMR1	3.98906	0.83065	0.186473	0.729385	none
121017	RANBP3	3.98894	1.98029	0.170411	0.768503	none
121016	GRID2IP	3.98855	3.74736	0.0976516	1.01032	none
121015	GUCA1B	3.9883	2.35705	0.158631	0.799612	none
121014	LCN9	3.98623	2.68143	0.145858	0.836068	none
121013	ZNF552	3.98378	1.24381	0.184623	0.733713	none
121012	hsa-mir-6076	3.98341	0.0652733	0.18807	0.72568	none
121011	TRHDE	3.97072	2.13626	0.168041	0.774584	none
121010	ZNF682	3.97034	-0.728572	0.186009	0.730465	none
121009	SMEK1	3.96869	1.85054	0.17564	0.755377	none
121008	BBS9	3.96748	2.11135	0.168964	0.772205	none
121007	CRABP1	3.96486	-0.103318	0.189196	0.723088	none
121006	ARFGEF1	3.96381	1.20014	0.187016	0.72812	none
121005	ZBTB45	3.96167	1.8006	0.177447	0.750931	none
121004	ANKRD65	3.96141	1.62583	0.18106	0.742177	none
121003	RPL39L	3.96058	1.78576	0.178102	0.749331	none
121002	VPS45	3.96054	1.1543	0.187783	0.726343	none
121001	SSR1	3.95977	1.92835	0.174414	0.758418	none
121000	SPIN1	3.95969	2.92305	0.136785	0.863961	none
120999	EXD2	3.95946	0.739068	0.189585	0.722197	none
120998	SEMA3E	3.95901	0.983324	0.189069	0.72338	none
120997	CBX3	3.9573	2.45842	0.157672	0.802246	none
120996	HARS	3.95604	1.62586	0.181515	0.741087	none
120995	YOD1	3.95556	3.76542	0.0992097	1.00345	none
120994	PARP1	3.95085	0.468886	0.19132	0.718239	none
120993	MRFAP1	3.9508	1.12172	0.18905	0.723424	none
120992	CCDC149	3.94854	2.29044	0.164376	0.784163	none
120991	GLUD1	3.94614	1.2676	0.187857	0.726173	none
120990	ACAA2	3.94442	2.32093	0.16374	0.785845	none
120989	NUTM2F	3.94369	1.54644	0.184181	0.734754	none
120988	POTEI	3.94311	1.19018	0.189034	0.723461	none
120987	hsa-mir-626	3.94118	2.05467	0.172688	0.762737	none
120986	ORM1	3.94063	1.25	0.188587	0.724488	none
120985	hsa-mir-1244-1	3.93957	5.79461	0.0743802	1.12854	none
120984	CAPN5	3.93546	1.06745	0.191041	0.718872	none
120983	KLHDC8A	3.9326	-0.444855	0.190836	0.719339	none
120982	CDY2B	3.93166	0.250989	0.193289	0.713793	none
120981	ARHGEF3	3.92576	2.35879	0.163949	0.785291	none
120980	B3GNT2	3.92539	1.90592	0.178059	0.749435	none
120979	ZCCHC12	3.92487	2.41445	0.161991	0.790508	none
120978	hsa-mir-510	3.92458	1.5525	0.18581	0.73093	none
120977	ISY1-RAB43	3.91853	-1.36546	0.19035	0.720447	none
120976	PAK7	3.91354	2.73955	0.149219	0.826176	none
120975	GPR75	3.91326	1.60901	0.185759	0.73105	none
120974	RPL38	3.91076	1.66594	0.18486	0.733158	none
120973	CGB2	3.90952	0.589712	0.194693	0.71065	none
120972	KIAA1614	3.90701	-0.49193	0.193428	0.713481	none
120971	FBLN5	3.90418	1.94836	0.178863	0.747479	none
120970	TUBB1	3.90315	3.83171	0.100134	0.999417	none
120969	AREL1	3.90241	0.821412	0.194483	0.711118	none
120968	DHX38	3.89936	2.49206	0.161452	0.791958	none
120967	CCDC169-SOHLH2	3.89551	-0.221571	0.195163	0.709602	none
120966	TMEM189	3.89488	0.788876	0.195624	0.708579	none
120965	FAM20C	3.8885	2.20773	0.172872	0.762275	none
120964	OR2T2	3.88843	1.18467	0.194058	0.71207	none
120963	C16orf46	3.88601	0.479768	0.197265	0.704951	none
120962	RASL12	3.88597	3.12124	0.13362	0.87413	none
120961	EZR	3.88482	5.08503	0.0785967	1.1046	none
120960	GMPS	3.88339	0.133112	0.197552	0.70432	none
120959	FBXW7	3.88311	1.03767	0.19605	0.707634	none
120958	ZNF490	3.88303	4.34257	0.0854528	1.06827	none
120957	CYP19A1	3.88195	3.18717	0.130885	0.88311	none
120956	FNTA	3.87824	-0.16801	0.196286	0.70711	none
120955	BST1	3.87783	1.66145	0.187951	0.725956	none
120954	THOC1	3.87665	2.81628	0.148727	0.82761	none
120953	SF3B1	3.87548	0.3034	0.198469	0.702307	none
120952	SPIN2B	3.87514	1.20518	0.195068	0.709815	none
120951	NonTargetingControlGuideForHuman_0941	3.87345	0.685505	0.197889	0.703578	none
120950	INA	3.87109	1.55103	0.190654	0.719754	none
120949	POLR2E	3.87057	2.30331	0.170941	0.767153	none
120948	hsa-mir-6770-3	3.86945	1.73854	0.187205	0.727682	none
120947	ALAS1	3.86745	2.2413	0.173525	0.760639	none
120946	UBTD1	3.86518	2.04447	0.179882	0.745012	none
120945	NR1I3	3.86514	2.76834	0.152002	0.818151	none
120944	SLC4A2	3.85842	2.1259	0.178379	0.748657	none
120943	EFCAB6	3.85774	3.00943	0.141149	0.850322	none
120942	RAB33A	3.85517	3.48179	0.119046	0.924286	none
120941	NBPF9	3.85285	2.95771	0.144003	0.841628	none
120940	CTNNBIP1	3.85263	-0.480571	0.198748	0.701697	none
120939	LIMA1	3.85106	-0.0196139	0.200036	0.698891	none
120938	TACC3	3.84877	2.00759	0.182385	0.739012	none
120937	CCDC87	3.84788	0.943276	0.199598	0.699843	none
120936	GPR39	3.84503	2.67229	0.158266	0.800613	none
120935	CTAG1B	3.84483	3.10716	0.137993	0.860143	none
120934	AIDA	3.84179	0.664465	0.201004	0.696796	none
120933	C2orf48	3.83674	2.4206	0.169659	0.770422	none
120932	LOH12CR1	3.83605	1.11329	0.199896	0.699195	none
120931	NDUFB7	3.83356	-0.700557	0.199813	0.699376	none
120930	DNAAF3	3.83205	2.58634	0.163367	0.786836	none
120929	AKIRIN1	3.83144	1.3533	0.197788	0.703801	none
120928	GPR35	3.83007	5.24143	0.0815802	1.08842	none
120927	HADH	3.82957	-2.25017	0.193022	0.714393	none
120926	OOEP	3.82943	2.84764	0.151365	0.819976	none
120925	RAD52	3.8288	0.96186	0.2014	0.695941	none
120924	DEFA6	3.82789	1.24209	0.199324	0.700441	none
120923	ZNF234	3.8277	1.22352	0.199451	0.700163	none
120922	TGIF2LX	3.82269	1.79511	0.190591	0.719899	none
120921	RAD23B	3.82073	1.08963	0.201514	0.695695	none
120920	STYX	3.81773	1.72888	0.192333	0.715947	none
120919	QARS	3.81415	1.51375	0.196888	0.705781	none
120918	SPTBN1	3.81137	2.42249	0.171941	0.764621	none
120917	C6orf47	3.80939	1.61764	0.195335	0.709219	none
120916	RFWD2	3.80862	0.805239	0.203697	0.691014	none
120915	PLEKHA1	3.80723	2.73381	0.158838	0.799046	none
120914	KRT25	3.80526	1.62024	0.195658	0.708502	none
120913	GJA9	3.80476	2.5056	0.169487	0.770864	none
120912	hsa-mir-378j	3.80415	1.17445	0.202393	0.693805	none
120911	TRPT1	3.80296	1.58347	0.196621	0.706371	none
120910	CHM	3.80239	2.06257	0.185313	0.732095	none
120909	PSORS1C2	3.8011	2.21677	0.180599	0.743284	none
120908	HADHB	3.7991	1.61048	0.196358	0.706952	none
120907	PTTG1	3.79844	1.63884	0.195879	0.708013	none
120906	LTBP4	3.79717	1.93521	0.189197	0.723085	none
120905	KIAA1468	3.79714	2.86809	0.153301	0.814456	none
120904	hsa-mir-6877	3.79641	1.61845	0.196562	0.706501	none
120903	GPC5	3.79109	0.486994	0.206528	0.685021	none
120902	GBX1	3.79072	0.507576	0.206391	0.685309	none
120901	CFL1	3.78979	2.91982	0.151355	0.820003	none
120900	DUSP22	3.78976	0.956225	0.205285	0.687643	none
120899	RGS7BP	3.78839	0.507731	0.206647	0.68477	none
120898	TEX13A	3.78703	3.18047	0.138939	0.857174	none
120897	RNPS1	3.77639	1.19768	0.204667	0.688952	none
120896	FAM20B	3.776	1.29175	0.203747	0.690909	none
120895	LHFPL1	3.77583	4.07321	0.100508	0.997798	none
120894	C7orf10	3.7754	1.61713	0.198661	0.701888	none
120893	EIF5	3.77418	0.715997	0.207543	0.682892	none
120892	VN1R1	3.77397	0.484384	0.207836	0.68228	none
120891	PSPC1	3.77303	0.149117	0.208177	0.681566	none
120890	PTCD3	3.77168	2.04103	0.188828	0.723935	none
120889	C22orf29	3.77163	3.64169	0.118424	0.926561	none
120888	XRCC5	3.77125	1.43793	0.202607	0.693345	none
120887	C9orf40	3.77055	1.83918	0.194398	0.711307	none
120886	XK	3.76848	0.37468	0.209178	0.679485	none
120885	KIAA1524	3.7675	1.59715	0.19978	0.699449	none
120884	WDR4	3.76574	1.35255	0.204243	0.689853	none
120883	CINP	3.76521	2.86416	0.156258	0.806159	none
120882	FCRL4	3.76167	1.06379	0.207725	0.68251	none
120881	CDK5R1	3.76092	1.70237	0.198398	0.702462	none
120880	LENEP	3.7576	1.66616	0.199432	0.700205	none
120879	HFE	3.75665	3.22511	0.139277	0.856121	none
120878	PRRC2B	3.75587	1.75331	0.197932	0.703484	none
120877	CD79A	3.74783	3.07907	0.147346	0.831662	none
120876	hsa-mir-650	3.74734	2.43175	0.17763	0.750484	none
120875	VWCE	3.74423	0.254239	0.2112	0.675305	none
120874	ZNF580	3.74256	2.68936	0.166867	0.77763	none
120873	HNRNPC	3.74052	0.289742	0.21204	0.673582	none
120872	SUMO2	3.73985	0.453325	0.211774	0.674127	none
120871	GLI3	3.73863	2.94126	0.154904	0.809938	none
120870	SKP1	3.73499	1.41195	0.206684	0.684693	none
120869	C19orf35	3.73446	1.87332	0.197037	0.705453	none
120868	C8orf87	3.72626	1.23762	0.209311	0.679209	none
120867	C16orf80	3.72395	1.40908	0.207826	0.6823	none
120866	PRAC	3.72056	2.61463	0.172411	0.763434	none
120865	hsa-mir-33a	3.71761	3.51823	0.12838	0.891502	none
120864	DDX3Y	3.71617	2.78708	0.164533	0.783746	none
120863	hsa-mir-1468	3.70812	2.90414	0.159542	0.797126	none
120862	HOXB2	3.70777	-1.05856	0.210777	0.676178	none
120861	SLC25A33	3.7049	2.84194	0.163168	0.787364	none
120860	CDY2A	3.70377	-0.105715	0.214505	0.668564	none
120859	CD247	3.70253	1.65995	0.205039	0.688164	none
120858	hsa-mir-3116-1	3.70242	1.43214	0.209576	0.678657	none
120857	PRSS54	3.7015	2.53788	0.177887	0.749857	none
120856	TRIM22	3.69823	2.77127	0.167071	0.777099	none
120855	CYB5R3	3.69693	2.28734	0.187999	0.725845	none
120854	UBE2Z	3.69681	0.389802	0.216131	0.665284	none
120853	CD1D	3.69551	0.687642	0.215244	0.667068	none
120852	CPSF4	3.69442	1.38925	0.211124	0.675462	none
120851	EXOSC5	3.69353	1.30541	0.21203	0.673602	none
120850	SLC9B2	3.69127	0.510017	0.216397	0.664749	none
120849	TRMT10A	3.68981	1.56266	0.208292	0.681326	none
120848	EFCAB6	3.6887	1.586	0.207954	0.682033	none
120847	hsa-mir-6759	3.68679	2.66107	0.173491	0.760722	none
120846	ASB2	3.68634	0.929698	0.215836	0.665876	none
120845	ZNF414	3.68533	2.4232	0.183984	0.73522	none
120844	hsa-mir-4791	3.6841	0.393551	0.217548	0.662446	none
120843	SLC30A4	3.68367	1.09526	0.215056	0.667449	none
120842	PPY	3.68332	0.547337	0.217126	0.663289	none
120841	PLA2G4F	3.68322	1.91912	0.200834	0.697162	none
120840	NonTargetingControlGuideForHuman_0257	3.68183	-0.138751	0.21646	0.664622	none
120839	PEAR1	3.6812	2.89536	0.162519	0.789095	none
120838	TOM1L2	3.68104	2.2539	0.190887	0.719224	none
120837	CLYBL	3.67898	2.3954	0.185652	0.731301	none
120836	SGOL1	3.67752	0.518987	0.217846	0.661851	none
120835	ASNA1	3.67714	1.95196	0.200625	0.697615	none
120834	NonTargetingControlGuideForHuman_0825	3.67094	2.21	0.19357	0.713161	none
120833	DNMT3B	3.66795	3.20985	0.148115	0.8294	none
120832	ASGR1	3.66738	3.15162	0.151099	0.820739	none
120831	MAST3	3.6665	2.41117	0.186229	0.729953	none
120830	VPS28	3.66599	0.832159	0.218217	0.661111	none
120829	SRP9	3.66395	0.856198	0.218192	0.661161	none
120828	KRTAP5-7	3.66311	1.26433	0.215643	0.666265	none
120827	GRM8	3.66096	2.07646	0.198879	0.701411	none
120826	QARS	3.66019	-0.594001	0.217764	0.662014	none
120825	ACR	3.65974	1.01987	0.218375	0.660797	none
120824	LSM4	3.6576	4.10387	0.108877	0.963064	none
120823	EPGN	3.65721	3.19609	0.149618	0.825016	none
120822	SLX1B	3.6565	1.35926	0.215356	0.666844	none
120821	TNNT3	3.65641	0.116973	0.217558	0.662425	none
120820	INPP5J	3.65328	2.75736	0.172059	0.764323	none
120819	COQ4	3.65282	1.38929	0.215372	0.666811	none
120818	hsa-mir-3610	3.65118	1.49493	0.213756	0.670081	none
120817	hsa-mir-1303	3.65054	1.23047	0.217196	0.663147	none
120816	ZNF296	3.65015	1.82124	0.206903	0.684234	none
120815	PIP5K1B	3.6475	4.96861	0.0953619	1.02062	none
120814	NUBPL	3.64495	1.91852	0.204856	0.688551	none
120813	NTMT1	3.64315	1.51427	0.214101	0.669382	none
120812	ZNF383	3.64227	1.84517	0.207122	0.683774	none
120811	ASGR2	3.64067	2.19201	0.197319	0.704831	none
120810	FOXO3	3.64041	1.09018	0.219958	0.65766	none
120809	BAGE	3.64022	-0.597021	0.219363	0.658837	none
120808	PARD3B	3.63838	1.55773	0.213505	0.670591	none
120807	LMO1	3.63703	1.88157	0.206651	0.684761	none
120806	KCNC3	3.6367	1.27233	0.218217	0.661112	none
120805	ABCC2	3.63591	0.662351	0.22188	0.653882	none
120804	PRR7	3.63017	2.93252	0.165605	0.780925	none
120803	PADI4	3.62967	1.79834	0.209733	0.678333	none
120802	hsa-mir-7153	3.62559	2.35856	0.192465	0.715648	none
120801	NAA50	3.6242	3.98508	0.115117	0.93886	none
120800	EVC2	3.62354	1.76127	0.211278	0.675146	none
120799	BZRAP1	3.62307	1.99196	0.205068	0.688103	none
120798	LOC100132247	3.6226	0.514448	0.223686	0.650361	none
120797	UBXN10	3.62059	1.68246	0.213132	0.671352	none
120796	FBXL19	3.61925	1.32595	0.219572	0.658424	none
120795	C1RL	3.61834	3.53581	0.136158	0.865958	none
120794	SIX1	3.61682	1.41968	0.218845	0.659864	none
120793	FHL5	3.61653	3.38709	0.143909	0.841911	none
120792	PDCD7	3.61618	2.54861	0.185838	0.730866	none
120791	SLC35E1	3.61499	0.0912892	0.224256	0.649255	none
120790	CRYZ	3.60973	3.31908	0.147845	0.830192	none
120789	PPP2R1A	3.6094	3.20969	0.153408	0.814151	none
120788	AK8	3.60939	2.41	0.192137	0.71639	none
120787	hsa-mir-578	3.60614	2.12638	0.203191	0.692096	none
120786	OR2B11	3.60461	0.564725	0.225474	0.646904	none
120785	COA6	3.60178	2.39869	0.193342	0.713673	none
120784	APLF	3.59909	2.05828	0.205731	0.686701	none
120783	FAM159A	3.59874	0.547752	0.226216	0.645476	none
120782	HSPBAP1	3.59828	2.54781	0.187692	0.726554	none
120781	C22orf42	3.59656	2.63998	0.183435	0.736517	none
120780	ZNF746	3.59603	1.03028	0.225121	0.647585	none
120779	IGDCC4	3.59513	2.2509	0.199767	0.699476	none
120778	TMOD2	3.59198	2.41785	0.19361	0.713072	none
120777	UBE2I	3.59186	1.59419	0.217994	0.661555	none
120776	RBM44	3.59009	0.99701	0.225768	0.646337	none
120775	PMFBP1	3.58889	0.0556566	0.226994	0.643986	none
120774	NFIB	3.58689	4.10729	0.114455	0.941364	none
120773	NDUFV2	3.58326	5.22095	0.0994027	1.0026	none
120772	CXCR5	3.5817	1.75595	0.21575	0.666049	none
120771	PPT2	3.57894	1.63319	0.218587	0.660376	none
120770	WARS	3.57883	0.501319	0.228381	0.64134	none
120769	TCHH	3.57694	5.61637	0.0992466	1.00328	none
120768	C8orf44	3.5766	3.71978	0.131422	0.881332	none
120767	hsa-mir-6813	3.57567	-0.101884	0.226657	0.64463	none
120766	TIAF1	3.57397	0.981907	0.227593	0.642841	none
120765	UBE3C	3.57367	2.80495	0.177562	0.75065	none
120764	ARHGEF6	3.57247	0.307609	0.22958	0.639065	none
120763	ELOVL2	3.57069	2.55544	0.190174	0.720848	none
120762	SET	3.5696	0.974619	0.227857	0.642338	none
120761	KLHL1	3.5674	1.8789	0.214138	0.669307	none
120760	NGFRAP1	3.56664	1.75712	0.217419	0.662703	none
120759	hsa-mir-1227	3.56583	2.37465	0.198036	0.703255	none
120758	BEND6	3.56566	2.90749	0.173207	0.761436	none
120757	NELFA	3.56506	0.303895	0.229605	0.639019	none
120756	ORAI2	3.56476	0.105679	0.229549	0.639125	none
120755	OTX1	3.56228	2.87455	0.175215	0.756429	none
120754	KCNJ15	3.56191	0.928077	0.228902	0.640351	none
120753	SDE2	3.55959	1.1493	0.227507	0.643006	none
120752	APCS	3.5573	4.33975	0.109536	0.960444	none
120751	KRTAP19-2	3.55545	-0.404427	0.228867	0.640418	none
120750	PDS5B	3.55497	-1.23518	0.22763	0.642771	none
120749	GAST	3.55216	1.98609	0.212774	0.672082	none
120748	PKMYT1	3.55169	2.52875	0.19346	0.71341	none
120747	SLC11A1	3.55081	0.285661	0.2318	0.634887	none
120746	HIST2H3A	3.54629	0.91131	0.230838	0.636692	none
120745	TAS2R7	3.5458	1.73796	0.220067	0.657444	none
120744	ATF1	3.5449	2.84812	0.178332	0.74877	none
120743	MGAM	3.54241	3.54073	0.14289	0.844997	none
120742	CYFIP1	3.5417	2.02287	0.21284	0.671946	none
120741	GPRASP1	3.53855	0.617843	0.232505	0.633567	none
120740	NXT1	3.5364	0.932146	0.23165	0.635168	none
120739	hsa-mir-1302-9	3.53497	0.177802	0.233445	0.631815	none
120738	AURKA	3.53376	1.13468	0.230958	0.636467	none
120737	hsa-mir-320e	3.53183	-0.32753	0.232248	0.634048	none
120736	COX4I1	3.53075	2.26774	0.205926	0.686289	none
120735	LMAN1L	3.52855	1.936	0.216723	0.664095	none
120734	SPAG9	3.52571	1.89682	0.218116	0.661312	none
120733	NFIL3	3.5251	0.674806	0.23387	0.631026	none
120732	OR10C1	3.52302	2.5549	0.19522	0.709475	none
120731	hsa-mir-548an	3.52148	0.889702	0.233571	0.631581	none
120730	LOC100288524	3.52129	1.53395	0.226928	0.644112	none
120729	hsa-mir-623	3.51791	2.52883	0.197062	0.705397	none
120728	UNC45A	3.51765	0.77617	0.234449	0.629951	none
120727	STX8	3.51502	3.17501	0.164626	0.783503	none
120726	BAMBI	3.51481	3.24401	0.160891	0.793469	none
120725	OR1F1	3.51037	1.10802	0.233693	0.631355	none
120724	TTBK1	3.50668	2.58476	0.195486	0.708884	none
120723	HOXB13	3.50464	2.41628	0.202908	0.692702	none
120722	DGCR6L	3.50423	1.61732	0.22704	0.643898	none
120721	CBWD5	3.49775	1.66183	0.226781	0.644393	none
120720	BAZ2A	3.49397	3.37314	0.156223	0.806255	none
120719	FAM133A	3.49388	1.835	0.223415	0.650887	none
120718	RSPH10B2	3.49326	1.73917	0.225834	0.646211	none
120717	GRPR	3.49309	2.44108	0.203198	0.692081	none
120716	C9orf92	3.49169	-0.957065	0.235583	0.627857	none
120715	OR2S2	3.49073	2.95471	0.178484	0.748402	none
120714	DEFB110	3.48938	1.33447	0.233576	0.631572	none
120713	SLC6A17	3.48849	4.46128	0.113286	0.945822	none
120712	SATB2	3.48788	1.33165	0.233966	0.630846	none
120711	PFKP	3.48633	1.98779	0.219938	0.6577	none
120710	KANK2	3.48548	1.76579	0.226174	0.645557	none
120709	STRC	3.48494	0.829964	0.237943	0.623528	none
120708	OR4K1	3.48373	2.81865	0.186227	0.729957	none
120707	FMO2	3.48314	2.29198	0.210181	0.677406	none
120706	NUB1	3.48187	0.208461	0.170191	0.769065	none
120705	TBCE	3.48184	0.623865	0.169911	0.769778	none
120704	FANCA	3.48181	-0.378603	0.169539	0.770731	none
120703	COPA	3.48179	-0.746533	0.169318	0.771297	none
120701	CDKN1A	3.48177	-1.13486	0.169092	0.771877	none
120702	OR52K1	3.48177	-1.13486	0.169092	0.771877	none
120700	F8A1	3.48177	-1.37989	0.169008	0.772093	none
120699	SCGB2B2	3.48177	-1.40965	0.168998	0.772119	none
120698	hsa-mir-100	3.48176	1.50561	0.231825	0.63484	none
120697	C14orf132	3.48175	-1.9727	0.168802	0.772623	none
120696	OAZ3	3.48174	-2.32547	0.168675	0.77295	none
120695	OR52B6	3.48174	-2.35688	0.168663	0.77298	none
120694	S100A12	3.48035	2.62552	0.153727	0.813251	none
120693	C1orf233	3.47772	1.43746	0.233675	0.631388	none
120692	CSTF2	3.47601	1.77085	0.227112	0.643759	none
120691	TCF7L1	3.47412	1.98894	0.221246	0.655124	none
120690	ANO6	3.47384	3.37567	0.158135	0.800972	none
120689	hsa-mir-3141	3.47382	0.668445	0.239782	0.620184	none
120688	PTH	3.473	2.64987	0.195929	0.707901	none
120687	BIRC8	3.4719	0.809934	0.239149	0.621332	none
120686	DNAJC28	3.46619	0.800119	0.240032	0.619731	none
120685	SNTG1	3.46522	-0.706242	0.239181	0.621274	none
120684	PLGLB1	3.46151	2.90602	0.184107	0.73493	none
120683	PXN	3.46086	2.41263	0.207875	0.682197	none
120682	SMCO4	3.45885	2.60957	0.199471	0.700121	none
120681	BRK1	3.45824	1.00285	0.240467	0.618944	none
120680	LPAR3	3.45576	2.97451	0.181139	0.741988	none
120679	CRY1	3.45331	-0.51482	0.240544	0.618805	none
120678	SMAGP	3.45253	2.31749	0.212535	0.67257	none
120677	CKLF	3.45111	2.76758	0.192363	0.715879	none
120676	CHCHD10	3.45092	3.01524	0.179523	0.745881	none
120675	RDH5	3.45036	3.21505	0.169019	0.772065	none
120674	PLIN3	3.4494	1.52682	0.235089	0.628767	none
120673	IFFO1	3.44829	2.02019	0.223281	0.651148	none
120672	GPR114	3.44783	2.00385	0.223835	0.650072	none
120671	hsa-mir-6728	3.44469	1.95982	0.225409	0.647029	none
120670	KCTD18	3.44448	4.71582	0.112986	0.946977	none
120669	MBLAC2	3.44398	1.15328	0.2408	0.618344	none
120668	NYAP1	3.44385	4.08325	0.127917	0.893071	none
120667	MTRNR2L8	3.44302	2.34425	0.212557	0.672525	none
120666	FZD8	3.43761	1.34159	0.17119	0.766521	none
120665	CHCHD10	3.4376	1.27576	0.240183	0.619457	none
120664	SSUH2	3.43756	-2.0511	0.171836	0.764886	none
120663	CAND2	3.43756	-1.90559	0.171888	0.764753	none
120662	ZNF165	3.43755	-1.86238	0.171904	0.764714	none
120661	hsa-mir-3677	3.43755	-1.83987	0.171912	0.764694	none
120660	hsa-mir-5692a-2	3.43755	-1.81894	0.171919	0.764675	none
120659	PEG3	3.43755	-1.69465	0.171963	0.764564	none
120658	SLC25A28	3.43755	-1.53034	0.172021	0.764419	none
120657	hsa-mir-4769	3.43754	-1.47912	0.172039	0.764374	none
120656	NonTargetingControlGuideForHuman_0986	3.43753	-1.15847	0.172148	0.764097	none
120655	RPL23A	3.43753	-0.95428	0.172266	0.7638	none
120654	CDC20	3.43751	-0.718408	0.172403	0.763456	none
120653	ADRM1	3.43751	-0.662017	0.172434	0.763376	none
120652	AGAP2	3.43751	-0.653534	0.172439	0.763364	none
120651	USHBP1	3.43751	2.3235	0.213997	0.669592	none
120650	IFNA16	3.43749	-0.312901	0.172689	0.762736	none
120649	RBM45	3.43745	0.0843266	0.173138	0.761608	none
120648	RNF152	3.43745	0.117466	0.173174	0.761518	none
120647	C5orf38	3.43472	2.76763	0.194147	0.71187	none
120646	SCGB2A1	3.43309	1.75762	0.232259	0.634028	none
120645	NR2E1	3.43236	1.76342	0.232211	0.634117	none
120644	ANKRD13A	3.43203	2.09205	0.223163	0.651378	none
120643	KPNA4	3.4302	1.76507	0.232465	0.633642	none
120642	SLC10A6	3.42978	3.02877	0.18108	0.742129	none
120641	KIAA0319L	3.42897	1.85244	0.230232	0.637834	none
120640	LRWD1	3.42388	3.79852	0.141896	0.84803	none
120639	SLC25A24	3.42229	-0.498108	0.244286	0.612102	none
120638	CGB1	3.42027	-0.970301	0.24344	0.613608	none
120637	NGRN	3.41886	1.26551	0.242581	0.615142	none
120636	MITF	3.41807	2.29151	0.217494	0.662554	none
120635	PMFBP1	3.41445	2.09225	0.225106	0.647614	none
120634	EFCAB1	3.4141	3.21468	0.172892	0.762224	none
120633	SNAI1	3.41349	3.13084	0.177379	0.751098	none
120632	CCDC147	3.41324	3.58627	0.153186	0.81478	none
120631	CNGB1	3.41154	1.4411	0.241269	0.617499	none
120630	ZBTB9	3.40967	1.1322	0.245009	0.610818	none
120629	hsa-mir-5591	3.40945	1.67636	0.236622	0.625945	none
120628	COPS2	3.40915	1.58368	0.238552	0.622416	none
120627	RHEBL1	3.40896	4.9116	0.115323	0.938083	none
120626	SHANK1	3.4085	3.02471	0.183666	0.73597	none
120625	hsa-mir-147a	3.40692	2.22934	0.221234	0.655149	none
120624	MYEF2	3.40598	2.1337	0.224979	0.647857	none
120623	C12orf79	3.40473	0.301398	0.248742	0.604251	none
120622	ZNF17	3.40428	2.48323	0.211426	0.674842	none
120621	MED24	3.40377	1.60824	0.238681	0.622182	none
120620	PTGR1	3.40366	3.53326	0.157066	0.803918	none
120619	ZNF415	3.40334	1.59909	0.23894	0.621711	none
120618	SELPLG	3.40298	1.2394	0.244613	0.611521	none
120617	RNF216	3.40241	3.02435	0.184277	0.734529	none
120616	LITAF	3.40182	2.2857	0.219559	0.658449	none
120615	USP17L4	3.40176	1.50085	0.241186	0.617648	none
120614	ORAI2	3.40161	2.13542	0.225425	0.646997	none
120613	DDO	3.40133	0.00671718	0.248029	0.605497	none
120612	ANKRD33B	3.40125	2.86506	0.192799	0.714895	none
120611	hsa-mir-486-2	3.40029	1.33673	0.244032	0.612554	none
120610	LRFN1	3.39802	1.7791	0.235676	0.627684	none
120609	SQSTM1	3.39777	1.68959	0.237744	0.623891	none
120608	MTBP	3.39693	1.25799	0.245198	0.610483	none
120607	KCNE1L	3.39643	4.11874	0.131173	0.882156	none
120606	OR51A7	3.39542	1.95447	0.231254	0.635911	none
120605	PXDN	3.39013	-1.11432	0.243767	0.613025	none
120604	EIF4G3	3.3901	-2.13411	0.242938	0.614504	none
120603	PLXNB1	3.38794	1.61689	0.24036	0.619138	none
120602	METTL12	3.38675	0.444135	0.250102	0.601883	none
120601	EEF1B2	3.38479	3.78421	0.146559	0.833989	none
120600	NonTargetingControlGuideForHuman_0214	3.38282	1.60445	0.241272	0.617492	none
120599	ATL1	3.38141	1.92772	0.233597	0.631533	none
120598	LYN	3.38076	3.98234	0.137396	0.862026	none
120597	TBL1XR1	3.37945	2.6257	0.207556	0.682864	none
120596	OR5P2	3.37832	1.52525	0.243497	0.613507	none
120595	CHRNA2	3.37703	2.05687	0.230441	0.63744	none
120594	BOD1L2	3.37629	2.24811	0.224007	0.649737	none
120593	SERPINE2	3.3762	3.32672	0.170847	0.767394	none
120592	SART1	3.37524	1.29889	0.247308	0.606762	none
120591	ZNF566	3.37515	3.26453	0.175028	0.756892	none
120590	NAA25	3.37491	-0.910274	0.249244	0.603375	none
120589	CLPSL1	3.37447	2.53427	0.212686	0.672261	none
120588	CKS2	3.37415	2.30007	0.222197	0.653262	none
120587	C11orf93	3.37406	1.43673	0.245763	0.609483	none
120586	RFX2	3.37274	3.11497	0.182689	0.738288	none
120585	GP1BA	3.3716	3.23434	0.176368	0.753581	none
120584	HOOK3	3.37084	2.48445	0.215243	0.66707	none
120583	NUFIP1	3.36818	1.10273	0.250337	0.601474	none
120582	TAS1R3	3.3674	3.19174	0.179211	0.746635	none
120581	KLHDC4	3.36721	2.16795	0.228366	0.641368	none
120580	PSMB3	3.36694	2.69383	0.205597	0.686984	none
120579	RGPD1	3.36565	0.431728	0.25316	0.596605	none
120578	KLF17	3.36425	4.29446	0.128281	0.891837	none
120577	ENDOV	3.36331	3.26758	0.17543	0.755895	none
120576	KRTAP10-10	3.36192	2.164	0.229098	0.639978	none
120575	MTMR14	3.3611	1.57711	0.244436	0.611835	none
120574	SLC7A6OS	3.36093	-0.350712	0.251801	0.598943	none
120573	GTPBP4	3.35937	1.53568	0.245185	0.610505	none
120572	hsa-mir-346	3.35926	0.729166	0.252942	0.596978	none
120571	AZI2	3.3591	1.59916	0.244144	0.612355	none
120570	WDR83OS	3.35841	1.29264	0.249469	0.602984	none
120569	LRRC18	3.35798	1.5297	0.245818	0.609385	none
120568	PCK2	3.35756	1.46753	0.24715	0.607039	none
120567	ZNF552	3.35612	2.16948	0.2296	0.639029	none
120566	KRTAP9-6	3.35519	1.81576	0.23996	0.619861	none
120565	TSPAN2	3.35447	1.65058	0.243634	0.613262	none
120564	RAB6C	3.35113	0.678933	0.253922	0.595299	none
120563	UAP1	3.35053	1.6279	0.244613	0.61152	none
120562	MKL1	3.35007	1.17001	0.25176	0.599013	none
120561	PGPEP1L	3.34875	1.61222	0.245177	0.61052	none
120560	ZNF575	3.3482	2.70115	0.207393	0.683207	none
120559	POTEB	3.34737	0.193897	0.255224	0.593078	none
120558	TCTN3	3.34637	1.51671	0.247332	0.60672	none
120557	TINAG	3.34504	2.77085	0.204062	0.690238	none
120556	PFKM	3.34141	1.2766	0.251643	0.599215	none
120555	PSME2	3.339	1.64646	0.245632	0.609716	none
120554	LILRB4	3.33833	1.21459	0.252672	0.597443	none
120553	OXLD1	3.33766	2.87591	0.19958	0.699883	none
120552	CACNA2D2	3.33337	4.0327	0.140482	0.852379	none
120551	EPO	3.3329	0.11923	0.256772	0.590452	none
120550	ZNF217	3.33235	1.14489	0.254189	0.594843	none
120549	C5orf54	3.33101	5.84462	0.120826	0.917839	none
120548	PRR23A	3.33049	1.62027	0.247183	0.606982	none
120547	DEGS2	3.32924	2.17055	0.232744	0.633122	none
120546	RPA1	3.32837	1.58841	0.248124	0.605331	none
120545	hsa-mir-548u	3.3279	1.45324	0.251018	0.600296	none
120544	MST1	3.32597	2.31793	0.227125	0.643736	none
120543	hsa-mir-629	3.32543	-0.0374808	0.257257	0.589633	none
120542	NonTargetingControlGuideForHuman_0812	3.32409	1.71058	0.246119	0.608855	none
120541	USP17L1P	3.32403	1.70837	0.246111	0.60887	none
120540	ZC3H12C	3.32294	3.26182	0.180163	0.744335	none
120539	THOP1	3.32219	3.22397	0.182506	0.738722	none
120538	ZNF574	3.32111	1.6147	0.248425	0.604805	none
120537	hsa-mir-517a	3.3205	0.522938	0.258282	0.587906	none
120536	PLGRKT	3.32028	2.58583	0.21639	0.664763	none
120535	TDO2	3.31983	2.51953	0.219778	0.658016	none
120534	TMEM19	3.31465	4.05028	0.141624	0.848863	none
120533	ZNRF3	3.31327	0.894497	0.257973	0.588425	none
120532	PCDHGB1	3.31252	1.0052	0.257812	0.588697	none
120531	EFEMP2	3.31202	3.6029	0.163002	0.787807	none
120530	TCEB3CL	3.31166	3.35321	0.176894	0.752287	none
120529	hsa-mir-208a	3.31122	1.39314	0.254035	0.595107	none
120528	ZNF599	3.31014	3.30268	0.179534	0.745854	none
120527	GAMT	3.30964	1.1834	0.256427	0.591037	none
120526	GAGE2C	3.30827	2.25386	0.231847	0.634799	none
120525	PPP4R1	3.30821	1.25277	0.255983	0.591788	none
120524	TRPC3	3.30782	1.00879	0.258397	0.587713	none
120523	DIS3	3.30774	2.26529	0.231442	0.635558	none
120522	CHD4	3.30633	-0.183207	0.259278	0.586234	none
120521	TARP	3.30612	0.857432	0.258979	0.586735	none
120520	GAK	3.30011	1.34231	0.255961	0.591826	none
120519	KLHL33	3.29569	1.60143	0.251842	0.598872	none
120518	CCDC34	3.2954	4.40075	0.132482	0.877843	none
120517	ARL4C	3.29298	3.41508	0.175298	0.756224	none
120516	HEATR6	3.29292	0.342743	0.262274	0.581245	none
120515	FBXO32	3.29131	1.53706	0.253674	0.595725	none
120514	OR6N1	3.2907	3.68555	0.161169	0.79272	none
120513	MYBL1	3.29059	1.64822	0.251409	0.599619	none
120512	DZIP1	3.29049	3.72164	0.159528	0.797164	none
120511	C20orf111	3.28973	-0.956159	0.258279	0.587911	none
120510	TUBG2	3.28767	2.04178	0.241606	0.616892	none
120509	COLGALT1	3.28616	2.59964	0.2198	0.657973	none
120508	C4orf6	3.28576	3.99585	0.146512	0.834127	none
120507	RAB1A	3.28479	3.1366	0.191449	0.717947	none
120506	GABPA	3.28432	3.90782	0.150851	0.821453	none
120505	RSBN1	3.28416	2.07212	0.241166	0.617685	none
120504	ADPGK	3.28338	1.33074	0.258144	0.588137	none
120503	ZNF850	3.28158	3.29225	0.18336	0.736695	none
120502	YEATS4	3.28105	3.51681	0.171015	0.766966	none
120501	COL17A1	3.27982	2.47461	0.226389	0.645145	none
120500	SOCS3	3.27953	0.752921	0.262472	0.580916	none
120499	DPYSL2	3.27794	3.17158	0.190293	0.720578	none
120498	OR4P4	3.27793	2.13554	0.240168	0.619484	none
120497	SLC22A6	3.27524	1.02977	0.262255	0.581276	none
120496	CCDC115	3.27453	1.9883	0.244764	0.611253	none
120495	C17orf51	3.27421	1.94755	0.24595	0.609153	none
120494	OTOG	3.2734	0.975345	0.262651	0.580621	none
120493	SCAPER	3.27248	2.64343	0.219278	0.659005	none
120492	NonTargetingControlGuideForHuman_0205	3.27168	1.24437	0.26059	0.584043	none
120491	MYLK3	3.26893	1.48631	0.257609	0.589039	none
120490	hsa-mir-5093	3.26869	0.985104	0.263296	0.579556	none
120489	DDX3X	3.26745	1.249	0.261025	0.583318	none
120488	PRKAB1	3.26516	1.74041	0.252668	0.597449	none
120487	BSG	3.26431	3.09993	0.196002	0.70774	none
120486	SLC9A1	3.26399	0.919303	0.263949	0.578481	none
120485	hsa-mir-6809	3.26382	1.45774	0.258826	0.586992	none
120484	CST7	3.26313	1.06996	0.263386	0.579407	none
120483	TRIB3	3.26309	1.58114	0.256308	0.591237	none
120482	hsa-mir-3685	3.26191	2.66749	0.219255	0.659051	none
120481	DENND4C	3.26133	2.66606	0.219433	0.658698	none
120480	QRICH2	3.26131	2.88119	0.208228	0.681461	none
120479	KRT6B	3.26064	-0.923996	0.261845	0.581955	none
120478	SH2D4A	3.25987	2.97498	0.203185	0.692109	none
120477	TEX38	3.25948	1.92046	0.248543	0.604598	none
120476	LOC100129361	3.25806	0.875102	0.264701	0.577244	none
120475	ECSIT	3.25771	2.07996	0.244203	0.612249	none
120474	hsa-mir-8078	3.25648	1.56159	0.257561	0.589121	none
120473	EFTUD2	3.25309	2.61211	0.223157	0.65139	none
120472	UBR3	3.25285	2.70866	0.218233	0.661079	none
120471	GPT	3.25253	2.19775	0.240953	0.618067	none
120470	CLEC4M	3.25191	2.20191	0.240874	0.61821	none
120469	STRAP	3.25014	1.34823	0.262075	0.581575	none
120468	NUPL1	3.24966	3.39683	0.181196	0.741852	none
120467	GPR151	3.2469	1.40468	0.261878	0.581901	none
120466	TUBB2A	3.24635	3.19186	0.192993	0.714458	none
120465	hsa-mir-1185-2	3.24487	0.0362728	0.267547	0.572599	none
120464	RABGAP1L	3.24486	2.87558	0.21037	0.677016	none
120463	ASB10	3.24458	0.585448	0.267531	0.572625	none
120462	LOC729059	3.24396	0.624282	0.267499	0.572678	none
120461	PAGE5	3.24316	0.268918	0.2684	0.571217	none
120460	WDR76	3.24237	2.02882	0.24758	0.606285	none
120459	DMP1	3.2419	3.51174	0.175674	0.755293	none
120458	FBLIM1	3.24163	2.24803	0.240234	0.619366	none
120457	LYPLAL1	3.24088	7.64783	0.134345	0.871778	none
120456	BLZF1	3.24079	3.56864	0.173163	0.761545	none
120455	TNK2	3.2403	1.85916	0.252711	0.597376	none
120454	STRA6	3.24016	5.77113	0.12965	0.887228	none
120453	NonTargetingControlGuideForHuman_0175	3.2386	1.51954	0.260667	0.583914	none
120452	SOCS3	3.23804	1.91592	0.251396	0.599641	none
120451	NUMBL	3.23774	3.70982	0.165771	0.780491	none
120450	GOPC	3.23674	1.54849	0.260304	0.58452	none
120449	SEZ6L2	3.23582	2.10788	0.246166	0.608771	none
120448	NME7	3.23504	1.07989	0.26701	0.573472	none
120447	LYST	3.23479	2.21439	0.242497	0.615293	none
120446	hsa-mir-133a-2	3.23479	1.30734	0.26452	0.577541	none
120445	NFKBIE	3.23419	1.19522	0.265819	0.575413	none
120444	IL36A	3.23232	2.79317	0.216221	0.665103	none
120443	ZW10	3.23208	3.64785	0.169482	0.770877	none
120442	ANKRD36	3.22923	0.144245	0.269719	0.569088	none
120441	PDZRN4	3.22897	3.13467	0.198067	0.703189	none
120440	SLC25A32	3.2276	2.23662	0.24242	0.615431	none
120439	FAM98B	3.22695	-1.39587	0.266984	0.573514	none
120438	CHST6	3.22663	2.26928	0.241252	0.617529	none
120437	ISL1	3.22571	2.89298	0.211724	0.67423	none
120436	hsa-mir-770	3.22463	1.86699	0.254443	0.59441	none
120435	NPR1	3.22411	3.06024	0.202782	0.692971	none
120434	SCAMP4	3.22404	2.57643	0.228498	0.641118	none
120433	CLEC19A	3.22201	2.02017	0.250372	0.601413	none
120432	hsa-mir-4634	3.22167	0.99803	0.269161	0.569987	none
120431	hsa-mir-126	3.22097	1.44632	0.264496	0.577581	none
120430	SPTY2D1	3.22007	0.528925	0.27053	0.567784	none
120429	EAF1	3.22004	3.43569	0.182424	0.738917	none
120428	ZCCHC8	3.21883	1.33449	0.266256	0.5747	none
120427	CCDC25	3.2184	1.22046	0.26755	0.572595	none
120426	SPATC1L	3.21797	2.1621	0.246745	0.607752	none
120425	THSD1	3.21752	2.85831	0.21457	0.668432	none
120424	RAP2C	3.21715	3.10054	0.201372	0.696002	none
120423	NOL9	3.21617	1.06955	0.269577	0.569317	none
120422	SDCCAG3	3.21587	2.81183	0.217276	0.662988	none
120421	GNAL	3.21519	2.05313	0.250262	0.601605	none
120420	LRRC36	3.21145	2.97937	0.208719	0.680439	none
120419	HARS	3.21139	1.02275	0.270389	0.56801	none
120418	OGFOD2	3.21132	1.08396	0.270004	0.568629	none
120417	KRTAP19-6	3.21125	0.267957	0.272359	0.564858	none
120416	BABAM1	3.20987	2.60744	0.228674	0.640783	none
120415	NonTargetingControlGuideForHuman_0294	3.20909	0.135207	0.272221	0.565079	none
120414	SMARCA1	3.20886	3.62915	0.173044	0.761845	none
120413	GTPBP3	3.20881	2.14524	0.24845	0.604761	none
120412	TSR1	3.20871	0.356923	0.272827	0.564113	none
120411	hsa-mir-3617	3.20854	1.84963	0.257032	0.590013	none
120410	SMARCD1	3.20854	1.64813	0.261688	0.582216	none
120409	MAD1L1	3.20701	3.4913	0.180861	0.742655	none
120408	IFNL1	3.20477	1.59794	0.263267	0.579604	none
120407	ANKRD54	3.20469	3.04423	0.206025	0.686079	none
120406	NCAPG2	3.20329	1.76387	0.260035	0.584968	none
120405	LLGL2	3.20167	1.12332	0.270751	0.56743	none
120404	NonTargetingControlGuideForHuman_0172	3.2014	-0.0821657	0.272711	0.564298	none
120403	EIF5AL1	3.20108	2.91151	0.213647	0.670304	none
120402	LRRC38	3.19934	2.49927	0.235295	0.628387	none
120401	AVL9	3.1989	1.45239	0.267201	0.573162	none
120400	EBI3	3.19868	5.09866	0.134998	0.869673	none
120399	FGFBP1	3.19855	5.14123	0.134917	0.869934	none
120398	KRTAP10-6	3.19836	2.08913	0.251375	0.599678	none
120397	UTP23	3.19602	2.06022	0.252536	0.597677	none
120396	NMNAT1	3.19488	1.68814	0.262651	0.580621	none
120395	C21orf33	3.19473	4.71767	0.137031	0.863182	none
120394	DDX53	3.19432	5.55681	0.134115	0.872523	none
120393	ZMYM6NB	3.19327	3.47902	0.183219	0.73703	none
120392	SERF1A	3.19237	0.568326	0.274153	0.562007	none
120391	hsa-mir-153-1	3.19204	2.00363	0.254636	0.594081	none
120390	LYPLAL1	3.19101	1.50248	0.267069	0.573377	none
120389	OR8U1	3.19092	2.14245	0.250801	0.600671	none
120388	G6PD	3.18899	3.37706	0.189631	0.722091	none
120387	SRGAP2B	3.18884	1.36752	0.269707	0.569108	none
120386	SMARCB1	3.18827	2.35633	0.242485	0.615314	none
120385	SNCB	3.18618	-0.562377	0.273307	0.563349	none
120384	CD320	3.18514	4.1831	0.150669	0.821975	none
120383	TWISTNB	3.18457	1.11783	0.272944	0.563927	none
120382	SLC35F2	3.18428	2.14493	0.251598	0.599293	none
120381	SETD2	3.18348	2.77609	0.225082	0.647659	none
120380	MYH15	3.18303	1.39064	0.270217	0.568288	none
120379	DMRTC2	3.17962	3.10748	0.205529	0.687126	none
120378	CCDC157	3.17894	1.10581	0.273787	0.562587	none
120377	ACTR1B	3.17893	4.2098	0.150688	0.82192	none
120376	NonTargetingControlGuideForHuman_0699	3.17859	-1.70656	0.266691	0.573992	none
120375	RS1	3.17646	1.2751	0.272358	0.564859	none
120374	EIF4G2	3.1763	1.24893	0.272703	0.56431	none
120373	OR7G2	3.17611	0.866325	0.275438	0.559976	none
120372	E2F3	3.17609	1.67066	0.265397	0.576104	none
120371	KRTAP9-6	3.17609	0.988648	0.274977	0.560704	none
120370	DRG2	3.17595	1.29185	0.272197	0.565117	none
120369	C18orf8	3.17576	0.562952	0.276465	0.558359	none
120368	SOX10	3.17535	0.680911	0.276001	0.559089	none
120367	C9orf89	3.17502	2.44703	0.240818	0.618311	none
120366	hsa-mir-3661	3.17436	-0.477921	0.270228	0.56827	none
120365	PHF1	3.17325	4.0778	0.155801	0.807429	none
120364	SMOC2	3.17237	0.893332	0.275838	0.559346	none
120363	DHODH	3.17055	1.54244	0.268914	0.570386	none
120362	FADS1	3.1704	1.55207	0.268729	0.570685	none
120361	DSC2	3.17021	1.20564	0.273914	0.562386	none
120360	RAP1GAP	3.16954	1.64871	0.266737	0.573917	none
120359	BEND6	3.16924	5.49559	0.136686	0.864276	none
120358	RPP30	3.16897	3.18404	0.202516	0.693541	none
120357	hsa-mir-221	3.16881	1.74446	0.264818	0.577052	none
120356	CC2D2A	3.16878	1.03913	0.27587	0.559295	none
120355	DSG3	3.16803	2.21536	0.250872	0.600548	none
120354	SLC35B4	3.16706	1.68402	0.266327	0.574585	none
120353	PPIP5K1	3.16577	2.245	0.24994	0.602164	none
120352	C10orf99	3.16567	2.00945	0.257859	0.588617	none
120351	USP53	3.16551	2.57057	0.236129	0.62685	none
120350	BTBD18	3.16348	2.6384	0.232924	0.632785	none
120349	FERMT2	3.16201	1.10763	0.276095	0.558942	none
120348	GPX8	3.16148	2.20482	0.252172	0.598304	none
120347	COX7A2	3.16082	3.28293	0.200606	0.697656	none
120346	NAAA	3.16082	5.092	0.139047	0.856837	none
120345	NBPF3	3.15975	3.27174	0.198721	0.701755	none
120344	MAN1B1	3.15872	1.87449	0.262707	0.580528	none
120343	OTOP1	3.15852	1.56503	0.269969	0.568686	none
120342	USP26	3.15813	2.53215	0.239058	0.621498	none
120341	MEX3C	3.15695	4.05203	0.158585	0.799737	none
120340	TLR10	3.15607	2.82309	0.224304	0.649162	none
120339	KLF15	3.15522	3.87836	0.166759	0.777912	none
120338	CLDN17	3.15391	2.87508	0.22154	0.654548	none
120337	CDCP2	3.15168	2.08578	0.257486	0.589247	none
120336	RRP1B	3.15138	2.57816	0.23757	0.624208	none
120335	SLCO1B1	3.15092	1.80719	0.265739	0.575544	none
120334	ABT1	3.15089	2.97154	0.217338	0.662865	none
120333	CTXN1	3.15049	2.02231	0.259452	0.585944	none
120332	MEIS3	3.15003	2.6049	0.236376	0.626396	none
120331	TADA1	3.14936	3.67686	0.177578	0.750611	none
120330	YBX3	3.14777	3.7155	0.176059	0.754343	none
120329	FAM204A	3.14735	1.85146	0.264839	0.577019	none
120328	SLC35C1	3.14637	4.48471	0.146533	0.834066	none
120327	ARFIP1	3.1446	2.74565	0.229742	0.63876	none
120326	RAB6C	3.14348	2.43637	0.244957	0.61091	none
120325	hsa-mir-6805	3.14194	1.32621	0.276266	0.558673	none
120324	RPL37A	3.14179	2.65333	0.234973	0.628983	none
120323	TMEM129	3.14072	3.58885	0.183254	0.736946	none
120322	ADCK1	3.13878	4.90899	0.142295	0.846811	none
120321	hsa-mir-7106	3.1384	1.00853	0.279451	0.553694	none
120320	TNFRSF8	3.13821	-0.289715	0.280098	0.55269	none
120319	LRRN1	3.13704	2.81982	0.226656	0.644633	none
120318	SRD5A1	3.13682	0.436441	0.281903	0.5499	none
120317	AQP11	3.13665	2.03497	0.260908	0.583512	none
120316	hsa-mir-1228	3.13541	1.21424	0.278408	0.555319	none
120315	OR8U8	3.13519	1.68239	0.270491	0.567848	none
120314	TNFSF9	3.13469	4.11326	0.158894	0.798893	none
120313	OPRD1	3.1345	2.58264	0.239486	0.620721	none
120312	OR2T3	3.13429	4.09493	0.159656	0.796814	none
120311	ADCK4	3.13411	2.0724	0.260153	0.584771	none
120310	NLGN3	3.13381	3.19946	0.205991	0.686152	none
120309	LIPC	3.1338	1.59689	0.272581	0.564505	none
120308	PODN	3.12984	2.11697	0.259445	0.585955	none
120307	SART3	3.12817	-0.384795	0.281484	0.550547	none
120306	SEL1L	3.12795	3.40045	0.195398	0.70908	none
120305	PPP1CB	3.12684	0.932504	0.281781	0.550088	none
120304	EIF4EBP1	3.12456	0.789512	0.282496	0.548988	none
120303	HIST1H2AE	3.12265	1.66847	0.272535	0.564578	none
120302	EPN1	3.12235	5.42531	0.142468	0.846282	none
120301	TCEB3CL2	3.12156	1.8638	0.267918	0.571998	none
120300	NOLC1	3.1201	0.176148	0.284159	0.546439	none
120299	GATAD1	3.11849	1.41408	0.278424	0.555293	none
120298	POGZ	3.11767	2.54889	0.243711	0.613124	none
120297	B4GALNT3	3.11622	2.45418	0.247798	0.605903	none
120296	NDUFS1	3.11613	1.32193	0.279642	0.553398	none
120295	POTEF	3.11584	0.32573	0.285062	0.54506	none
120294	TAF5L	3.1155	-0.191898	0.283691	0.547154	none
120293	DRD2	3.11305	3.17854	0.209942	0.677901	none
120292	TOMM40L	3.11277	1.76876	0.271715	0.565887	none
120291	hsa-mir-7704	3.11204	1.84175	0.269813	0.568937	none
120290	MYH9	3.11202	4.05427	0.163795	0.7857	none
120289	CNKSR3	3.11183	1.93115	0.267257	0.573072	none
120288	SF1	3.11099	0.616365	0.284893	0.545318	none
120287	SURF1	3.11042	1.14633	0.282473	0.549022	none
120286	ZNF35	3.10866	0.667363	0.284908	0.545295	none
120285	DCDC1	3.10798	1.37411	0.280247	0.552459	none
120284	IL1RAP	3.10777	1.81802	0.271094	0.566879	none
120283	ANKRD2	3.10756	2.48458	0.247685	0.606101	none
120282	ZNF449	3.10731	4.69161	0.14699	0.832711	none
120281	LY86	3.10717	2.31256	0.254786	0.593824	none
120280	TAS2R60	3.10511	4.42924	0.152078	0.817934	none
120279	C1orf174	3.10494	2.12319	0.262553	0.580783	none
120278	IZUMO3	3.10286	2.42758	0.250689	0.600865	none
120277	hsa-mir-2355	3.10257	2.8817	0.227778	0.642487	none
120276	SLC39A10	3.10172	3.88791	0.172626	0.762893	none
120275	SLC27A2	3.10121	2.81343	0.231737	0.635005	none
120274	CDV3	3.09985	2.18814	0.260939	0.58346	none
120273	LRRC24	3.09971	1.60262	0.276968	0.557571	none
120272	CTNS	3.09949	2.17517	0.261517	0.5825	none
120271	UBE4B	3.09911	2.62084	0.24218	0.615862	none
120270	PLEKHA7	3.09905	2.62915	0.241796	0.616551	none
120269	ATR	3.09799	2.44658	0.250629	0.600969	none
120268	ABHD10	3.09783	1.74604	0.274177	0.561968	none
120267	NDUFA9	3.09738	2.79614	0.233064	0.632525	none
120266	C22orf26	3.0971	3.46429	0.195625	0.708575	none
120265	MGA	3.09659	3.44193	0.197168	0.705163	none
120264	POTEB	3.0959	0.582873	0.286932	0.542222	none
120263	ARF6	3.0956	2.00002	0.267381	0.572869	none
120262	NonTargetingControlGuideForHuman_0737	3.09552	0.416053	0.287572	0.541254	none
120261	RNF40	3.0953	3.24169	0.208464	0.680969	none
120260	IL13	3.09519	2.01177	0.267093	0.573337	none
120259	AAR2	3.09519	2.77253	0.234636	0.629606	none
120258	GATAD2A	3.09512	1.37981	0.281921	0.549872	none
120257	PPM1A	3.09482	1.77939	0.273923	0.562372	none
120256	TMEM14A	3.09441	1.57526	0.278242	0.555578	none
120255	MGST3	3.09426	3.29923	0.205437	0.687322	none
120254	SNTB2	3.09302	0.0133988	0.287303	0.54166	none
120253	SPATA31A4	3.09277	1.61366	0.27765	0.556503	none
120252	USP20	3.09208	1.90228	0.270692	0.567524	none
120251	HRK	3.09173	1.90054	0.270826	0.56731	none
120250	KRTAP26-1	3.09152	1.88514	0.271317	0.566524	none
120249	LYPD2	3.0914	0.952315	0.286402	0.543023	none
120248	SRP68	3.09137	2.55929	0.246356	0.608437	none
120247	SMARCD2	3.09087	3.75934	0.180435	0.743679	none
120246	CCDC152	3.09073	0.261183	0.288383	0.54003	none
120245	LRRC25	3.08902	1.77929	0.274727	0.561098	none
120244	SPAST	3.08813	2.96852	0.224801	0.648202	none
120243	SEMA4C	3.08731	1.91662	0.270953	0.567106	none
120242	DLGAP5	3.08679	1.03571	0.286848	0.542349	none
120241	MDP1	3.08586	1.15633	0.285727	0.544049	none
120240	RPP14	3.08549	1.69186	0.277002	0.557517	none
120239	BCL2L12	3.08512	3.26718	0.208296	0.68132	none
120238	PTPRE	3.08504	2.26435	0.259734	0.585472	none
120237	RNF144B	3.08354	1.79515	0.275058	0.560575	none
120236	HSP90B1	3.08294	0.703123	0.2884	0.540005	none
120235	SLC7A6	3.08224	3.88119	0.175148	0.756596	none
120234	SOX11	3.08125	-0.231057	0.287827	0.540868	none
120233	METTL5	3.08104	2.78013	0.236474	0.626217	none
120232	CATSPERB	3.08026	0.187445	0.289569	0.538248	none
120231	hsa-mir-187	3.07923	3.98002	0.170396	0.76854	none
120230	SRRM5	3.07893	3.75722	0.181996	0.739939	none
120229	CLSTN3	3.07886	2.86122	0.232008	0.634496	none
120228	ZAR1	3.07735	1.75016	0.276874	0.557717	none
120227	POLR2L	3.07729	1.74375	0.276998	0.557523	none
120226	PTPRCAP	3.07716	1.38365	0.284295	0.54623	none
120225	TMEM212	3.07685	1.91965	0.272275	0.564993	none
120224	TRIM49C	3.07655	1.45465	0.28329	0.547769	none
120223	PCDH20	3.07653	1.33914	0.284913	0.545287	none
120222	NDNF	3.07446	3.97747	0.17105	0.766878	none
120221	SEPHS2	3.07402	2.00646	0.270074	0.568517	none
120220	CAMK1	3.074	2.89991	0.231149	0.636107	none
120219	DEFB105A	3.074	2.42273	0.2547	0.593971	none
120218	KLHL3	3.07322	3.67417	0.187137	0.72784	none
120217	CHMP2A	3.07269	2.87693	0.2319	0.634699	none
120216	VIPAS39	3.07162	0.179544	0.290591	0.536718	none
120215	EIF3J	3.06993	1.42398	0.284803	0.545455	none
120214	hsa-mir-381	3.0699	1.26018	0.286518	0.542848	none
120213	HCRTR1	3.06913	-0.450307	0.289359	0.538564	none
120212	hsa-mir-6800	3.06906	3.83166	0.179326	0.746358	none
120211	TEX12	3.0686	2.78024	0.237721	0.623932	none
120210	IL9	3.06851	2.62785	0.245863	0.609307	none
120209	NFKBIE	3.06827	2.40319	0.25627	0.591302	none
120208	hsa-mir-548i-4	3.06775	1.9515	0.272577	0.564511	none
120207	IL1RL2	3.06768	2.36196	0.258038	0.588316	none
120206	GPKOW	3.06762	1.01952	0.289379	0.538533	none
120205	GNG11	3.06702	1.37024	0.285871	0.54383	none
120204	CHRDL1	3.06675	4.9322	0.150214	0.82329	none
120203	TMED1	3.06617	1.67874	0.279893	0.553008	none
120202	SESN3	3.06447	1.1945	0.288223	0.540271	none
120201	DHODH	3.06366	1.53438	0.28331	0.547739	none
120200	hsa-mir-4298	3.06355	0.723648	0.290811	0.536389	none
120199	HIST3H2A	3.06254	1.19289	0.288455	0.539921	none
120198	NDUFA7	3.06253	3.00971	0.225853	0.646175	none
120197	MTRNR2L1	3.06219	2.02855	0.27106	0.566935	none
120196	EWSR1	3.0616	3.44965	0.201072	0.696648	none
120195	NUDCD3	3.06045	2.58609	0.249136	0.603563	none
120194	hsa-mir-636	3.05872	3.19272	0.215994	0.665558	none
120193	FADS2	3.058	1.55417	0.283656	0.547208	none
120192	HERC4	3.05781	1.79873	0.278405	0.555324	none
120191	FCGR2A	3.05643	2.40924	0.2577	0.588885	none
120190	PI4KB	3.05384	2.76083	0.24074	0.618452	none
120189	hsa-mir-6836	3.05288	1.97361	0.273908	0.562395	none
120188	ZAR1L	3.05119	0.67762	0.292804	0.533423	none
120187	GAB4	3.05109	0.105109	0.293191	0.532849	none
120186	RPP21	3.05096	2.1256	0.269791	0.568972	none
120185	ARHGAP33	3.05007	1.36883	0.288166	0.540357	none
120184	CPEB1	3.04947	0.978705	0.292017	0.534593	none
120183	MB21D1	3.04946	3.06778	0.224361	0.649052	none
120182	SSR4	3.04901	1.49288	0.286171	0.543374	none
120181	RPH3A	3.04854	3.34628	0.208526	0.680839	none
120180	GPR25	3.04824	4.08758	0.170977	0.767063	none
120179	RMND5A	3.04721	1.62435	0.283633	0.547243	none
120178	KRTAP19-3	3.0472	1.79307	0.280037	0.552784	none
120177	ADAMTS9	3.04575	3.9834	0.174245	0.75884	none
120176	LCE5A	3.04574	1.85145	0.278515	0.555151	none
120175	SYNCRIP	3.0454	3.61511	0.19355	0.713207	none
120174	NMNAT3	3.04505	2.71377	0.244507	0.611709	none
120173	APLP1	3.04426	2.62519	0.24925	0.603365	none
120172	DAD1	3.04323	2.82462	0.238667	0.622208	none
120171	RNF139	3.0422	1.9441	0.276227	0.558734	none
120170	CYP2C19	3.04038	2.51249	0.255523	0.592571	none
120169	OR4F4	3.03907	3.55891	0.197554	0.704313	none
120168	YTHDC1	3.03865	2.18841	0.269194	0.569935	none
120167	TBC1D3C	3.03857	1.16651	0.292068	0.534516	none
120166	SERPINA11	3.03742	2.88922	0.235915	0.627244	none
120165	ZMAT5	3.03726	2.88401	0.236225	0.626675	none
120164	PRIMA1	3.0369	4.03599	0.173364	0.761041	none
120163	CALHM3	3.03617	6.0506	0.152252	0.817437	none
120162	UBE2C	3.03463	1.14395	0.292881	0.533309	none
120161	SKA2	3.03216	2.18434	0.2703	0.568154	none
120160	IL13RA2	3.03179	0.193807	0.295932	0.528808	none
120159	KCNS3	3.03132	1.79445	0.282188	0.549461	none
120158	PDLIM5	3.03017	1.28018	0.29193	0.534722	none
120157	SSMEM1	3.02998	3.24525	0.216731	0.664079	none
120156	ZNF571	3.02965	1.98033	0.27688	0.557708	none
120155	RAB6B	3.02942	1.60695	0.286473	0.542916	none
120154	C19orf21	3.02887	2.64362	0.250364	0.601427	none
120153	MUC20	3.02818	0.476743	0.296545	0.527909	none
120152	TNFAIP3	3.02784	2.46018	0.259393	0.586042	none
120151	C11orf52	3.02772	1.39145	0.291004	0.536101	none
120150	SYT14	3.0275	1.03411	0.294907	0.530315	none
120149	C1orf189	3.0259	3.84323	0.184126	0.734885	none
120148	hsa-mir-518b	3.02573	3.84697	0.183969	0.735255	none
120147	PINX1	3.02568	3.47771	0.203966	0.690441	none
120146	C5orf47	3.02544	-0.171891	0.296183	0.52844	none
120145	DPAGT1	3.02394	1.6397	0.286505	0.542868	none
120144	RBAK	3.02364	-0.338435	0.295771	0.529045	none
120143	SPOP	3.02332	0.71993	0.296393	0.528132	none
120142	RAB11FIP5	3.02304	2.71226	0.247687	0.606096	none
120141	SPATA31E1	3.0224	3.82409	0.185546	0.731549	none
120140	AFMID	3.02223	0.916471	0.296081	0.52859	none
120139	ARHGAP25	3.02184	5.21357	0.154222	0.811855	none
120138	CDC27	3.02036	2.59659	0.25398	0.595201	none
120137	CRLS1	3.02035	0.740837	0.296818	0.527509	none
120136	ULBP3	3.01815	1.69868	0.286084	0.543506	none
120135	GPR75-ASB3	3.01808	2.89751	0.238042	0.623346	none
120134	CRIP3	3.01796	2.15769	0.273354	0.563275	none
120133	FAM53B	3.01792	1.61823	0.287802	0.540906	none
120132	CNIH2	3.01783	3.95802	0.179057	0.747008	none
120131	LRIT3	3.01782	2.62409	0.252882	0.597082	none
120130	STK17B	3.0175	1.22117	0.294389	0.531079	none
120129	CSE1L	3.01748	2.02072	0.277426	0.556853	none
120128	SAMD10	3.01747	3.91897	0.181251	0.741719	none
120127	CSRP2	3.01722	2.33677	0.265942	0.575213	none
120126	RARA	3.01679	5.71027	0.154107	0.812178	none
120125	WNK1	3.01672	2.47705	0.260221	0.584658	none
120124	DHRS4L2	3.01642	5.91027	0.154404	0.811342	none
120123	CDK15	3.01503	1.76923	0.284997	0.54516	none
120122	SDHD	3.0143	2.69601	0.249634	0.602696	none
120121	BOLL	3.01361	2.56131	0.256747	0.590495	none
120120	ISG20	3.01345	3.51043	0.203689	0.691033	none
120119	NonTargetingControlGuideForHuman_0935	3.01328	0.985052	0.297062	0.527153	none
120118	LIPC	3.01312	5.58113	0.154384	0.811398	none
120117	BBS10	3.01241	3.4762	0.205762	0.686635	none
120116	MTHFD2	3.01232	1.74309	0.28594	0.543726	none
120115	ACAP1	3.01169	2.20701	0.272113	0.565251	none
120114	C7orf49	3.01072	0.815049	0.297958	0.525844	none
120113	MAFF	3.00989	1.68708	0.28745	0.541438	none
120112	CYB5R2	3.00917	2.03766	0.278078	0.555833	none
120111	TIMM13	3.00725	3.6482	0.196698	0.7062	none
120110	SNRNP25	3.00698	4.62066	0.160029	0.795802	none
120109	KIF15	3.00694	2.01583	0.27901	0.55438	none
120108	TMEM31	3.00689	1.17327	0.296375	0.528159	none
120107	BPIFB2	3.00562	4.03048	0.177448	0.750928	none
120106	FLRT2	3.00536	1.38982	0.294201	0.531356	none
120105	ATF3	3.00482	1.27788	0.295414	0.529569	none
120104	CCDC43	3.00478	1.88534	0.283166	0.547959	none
120103	ARHGEF19	3.00383	5.30883	0.157183	0.803595	none
120102	YY1	3.00287	2.79981	0.245497	0.609954	none
120101	GABRB2	3.00169	0.488933	0.300332	0.522399	none
120100	UQCRC2	3.00065	2.30672	0.269512	0.569422	none
120099	SNX25	2.99991	5.84602	0.1563	0.806041	none
120098	hsa-mir-7-3	2.99954	1.24512	0.296566	0.527878	none
120097	ANP32E	2.99753	1.23825	0.296988	0.527261	none
120096	ZMYM2	2.99742	0.707234	0.300091	0.522748	none
120095	COG7	2.99728	3.70889	0.194813	0.710383	none
120094	ARAP3	2.99696	3.94681	0.182309	0.739191	none
120093	UBE2E3	2.99637	1.29322	0.296534	0.527925	none
120092	SVEP1	2.99559	1.76977	0.287743	0.540996	none
120091	ZNF510	2.99485	0.0259552	0.301041	0.521374	none
120090	NUP88	2.99374	1.10963	0.2989	0.524475	none
120089	GPI	2.99374	1.77934	0.287781	0.540938	none
120088	NAB1	2.99298	1.96064	0.282585	0.548851	none
120087	GZMK	2.99186	3.02973	0.234208	0.630398	none
120086	ATAD3C	2.99077	1.79771	0.2877	0.54106	none
120085	ODF2L	2.99059	1.87258	0.285504	0.544388	none
120084	C2orf53	2.98945	1.51764	0.293906	0.531791	none
120083	SAMD9L	2.98842	1.48705	0.294728	0.530579	none
120082	TRIM17	2.98719	1.46435	0.295462	0.529499	none
120081	EIF4H	2.98689	2.80055	0.247628	0.6062	none
120080	SEMA3B	2.98675	3.04994	0.233739	0.631268	none
120079	hsa-mir-3151	2.98547	0.799775	0.301335	0.52095	none
120078	TP53TG5	2.98517	1.76264	0.28935	0.538577	none
120077	GIGYF1	2.9847	2.01616	0.282166	0.549495	none
120076	ACTG2	2.98393	1.61754	0.292604	0.53372	none
120075	OR2T5	2.98371	2.37253	0.269134	0.570032	none
120074	S1PR5	2.98351	1.68238	0.291216	0.535784	none
120073	ZSWIM8	2.98293	3.39669	0.21466	0.668249	none
120072	FAM132A	2.98232	2.75093	0.25102	0.600292	none
120071	NFU1	2.98196	5.36052	0.158562	0.799801	none
120070	PPL	2.98179	4.90282	0.160434	0.794704	none
120069	PAGE4	2.98112	3.67357	0.198772	0.701644	none
120068	SPAG1	2.98052	0.807699	0.302177	0.519738	none
120067	CHORDC1	2.98048	1.9808	0.283733	0.547091	none
120066	hsa-mir-489	2.97971	2.66693	0.255911	0.591912	none
120065	RPL3	2.97934	1.65009	0.292569	0.533772	none
120064	LIN9	2.97854	2.35465	0.270575	0.567713	none
120063	hsa-mir-6083	2.9783	2.87693	0.244654	0.611448	none
120062	ANO5	2.97811	3.4404	0.21239	0.672865	none
120061	hsa-mir-3131	2.97783	2.32738	0.271849	0.565672	none
120060	SRCRB4D	2.97781	6.68699	0.160979	0.793232	none
120059	C12orf50	2.97765	1.61804	0.293485	0.532414	none
120058	WTIP	2.97715	1.84555	0.288192	0.540318	none
120057	GLYCTK	2.97615	0.878632	0.302645	0.519067	none
120056	NSG1	2.97603	3.34159	0.218355	0.660837	none
120055	SNRPD1	2.97514	2.43483	0.2678	0.57219	none
120054	KXD1	2.97512	3.33751	0.218802	0.65995	none
120053	RANBP3	2.97482	3.09244	0.232946	0.632745	none
120052	SLC27A3	2.97444	2.7836	0.250315	0.601513	none
120051	FAM183A	2.97311	2.1399	0.28017	0.552579	none
120050	PPP1R13B	2.97222	2.96031	0.240772	0.618395	none
120049	EXOC8	2.97146	2.85499	0.246826	0.60761	none
120048	FEZ2	2.97141	3.53908	0.207603	0.682766	none
120047	MYCL1	2.97118	1.74646	0.291684	0.535088	none
120046	IQSEC3	2.97077	2.74947	0.252748	0.597312	none
120045	EIF2D	2.97059	2.6146	0.259924	0.585153	none
120044	TFAP4	2.97048	2.50961	0.265326	0.57622	none
120043	ZNF132	2.96816	1.99096	0.285174	0.544891	none
120042	MAPK9	2.96667	1.72349	0.292779	0.533461	none
120041	PFDN1	2.96583	0.579043	0.304861	0.515899	none
120040	RNF168	2.96512	0.651241	0.304768	0.51603	none
120039	TMEM102	2.96471	2.40653	0.270379	0.568027	none
120038	CCDC120	2.96453	1.01686	0.303905	0.517262	none
120037	LHX2	2.96409	2.2846	0.275558	0.559786	none
120036	NOTCH3	2.96348	2.02807	0.284757	0.545526	none
120035	VBP1	2.96183	0.00819117	0.305514	0.514969	none
120034	SOLH	2.96139	3.39555	0.217575	0.662391	none
120033	C22orf26	2.9613	-0.217189	0.305091	0.515571	none
120032	hsa-mir-5579	2.96037	2.25486	0.277384	0.556919	none
120031	VNN2	2.95997	2.92762	0.244333	0.612017	none
120030	TBX22	2.95859	4.01791	0.183924	0.735362	none
120029	LCN9	2.95737	0.58433	0.306266	0.513902	none
120028	TAF1A	2.95734	2.1905	0.280461	0.552128	none
120027	NonTargetingControlGuideForHuman_0107	2.95721	2.37748	0.272688	0.564334	none
120026	RHBDD2	2.95713	3.24792	0.226332	0.645254	none
120025	SPRED3	2.95552	1.1526	0.303933	0.517222	none
120024	NOSTRIN	2.95486	2.45355	0.269842	0.568891	none
120023	ZNF92	2.95483	1.65068	0.296033	0.52866	none
120022	HSD17B12	2.95468	1.035	0.305239	0.515359	none
120021	SRL	2.9538	2.0233	0.286303	0.543175	none
120020	OR10H4	2.95279	1.23626	0.303282	0.518154	none
120019	hsa-mir-4794	2.95162	0.792913	0.306321	0.513824	none
120018	FREM2	2.95069	0.852447	0.306283	0.513878	none
120017	KLHL22	2.9493	0.577178	0.307283	0.512461	none
120016	PIGX	2.9492	3.43159	0.216816	0.663909	none
120015	CENPM	2.94842	1.97656	0.288488	0.539873	none
120014	BIVM	2.94783	0.523106	0.307829	0.51169	none
120013	SPOCK3	2.94737	1.16431	0.304916	0.51582	none
120012	PGAP3	2.94458	2.73082	0.257507	0.58921	none
120011	ZNF69	2.94424	2.40496	0.27336	0.563265	none
120010	C6orf70	2.94414	1.53732	0.300004	0.522873	none
120009	OR2W3	2.94389	0.271633	0.308941	0.510124	none
120008	ARL15	2.94353	2.66427	0.261137	0.583131	none
120007	ADRA2B	2.94346	3.6403	0.205527	0.687131	none
120006	NUFIP2	2.94345	4.53065	0.169603	0.770567	none
120005	NUBP2	2.9432	2.41945	0.27291	0.563981	none
120004	TAX1BP1	2.94314	3.35133	0.222308	0.653045	none
120003	UNC119B	2.94299	3.22858	0.229441	0.639329	none
120002	TRIB1	2.94281	2.90935	0.247736	0.606011	none
120001	OR8U1	2.94208	4.0192	0.186045	0.730383	none
120000	SFMBT1	2.94176	2.82094	0.253122	0.59667	none
119999	PLEKHS1	2.94162	0.923758	0.307452	0.512222	none
119998	AKAP2	2.941	3.93	0.190998	0.718972	none
119997	LIPI	2.94061	6.1429	0.163958	0.785269	none
119996	PTP4A2	2.94043	5.27988	0.163841	0.785576	none
119995	RNF212	2.94024	-0.134585	0.308154	0.511232	none
119994	MRPS24	2.94013	1.50069	0.301332	0.520955	none
119993	ARHGAP11B	2.93943	2.69541	0.26009	0.584876	none
119992	CHCHD3	2.93888	4.71032	0.166727	0.777994	none
119991	B9D1	2.93885	-1.05904	0.305842	0.514503	none
119990	RAB40B	2.93785	2.33273	0.27726	0.557114	none
119989	MZT2A	2.93757	2.23173	0.281518	0.550494	none
119988	NAT10	2.93737	2.03406	0.28832	0.540125	none
119987	COX4I2	2.93666	2.97029	0.245181	0.610513	none
119986	ZNF280D	2.93658	3.90017	0.192598	0.715349	none
119985	NonTargetingControlGuideForHuman_0777	2.93633	1.54732	0.300909	0.521565	none
119984	GJB5	2.93612	0.57642	0.309351	0.509548	none
119983	PCDHGA8	2.93533	-1.86531	0.305521	0.514959	none
119982	PRKCB	2.93421	3.84781	0.19573	0.708342	none
119981	SH2B1	2.93395	3.04434	0.241399	0.617264	none
119980	ZNF665	2.93264	-0.757744	0.307788	0.511748	none
119979	ZNF425	2.93109	1.26284	0.306144	0.514075	none
119978	FAM172A	2.93004	2.6223	0.265285	0.576287	none
119977	ENPP1	2.92951	-0.22229	0.309225	0.509725	none
119976	CD37	2.92904	3.03439	0.242676	0.614973	none
119975	KBTBD7	2.92868	2.5901	0.267185	0.573188	none
119974	PMS2	2.92733	2.62827	0.265334	0.576208	none
119973	GABRA6	2.92722	2.82352	0.254748	0.593889	none
119972	ZNF613	2.92587	3.96694	0.190675	0.719706	none
119971	NonTargetingControlGuideForHuman_0125	2.92418	2.32534	0.279581	0.553493	none
119970	CORO2B	2.92399	1.91976	0.293648	0.532173	none
119969	ZNF765	2.92371	1.18703	0.308067	0.511355	none
119968	FLNC	2.92228	3.04793	0.243066	0.614277	none
119967	NonTargetingControlGuideForHuman_0210	2.92196	3.88943	0.195155	0.709621	none
119966	PDCL3	2.92174	3.38741	0.223892	0.649962	none
119965	AANAT	2.92144	0.992513	0.310093	0.508508	none
119964	PSMG2	2.91848	2.18259	0.286385	0.54305	none
119963	hsa-mir-6867	2.91847	2.86345	0.253769	0.595561	none
119962	EMB	2.91807	2.01016	0.291826	0.534876	none
119961	PYGO1	2.91599	1.89589	0.295493	0.529452	none
119960	GHSR	2.91571	0.380217	0.31285	0.504665	none
119959	hsa-mir-6775	2.91545	2.86036	0.254429	0.594434	none
119958	LAGE3	2.9151	2.34102	0.280206	0.552523	none
119957	PFDN5	2.91344	2.1223	0.289281	0.53868	none
119956	ADAMTS4	2.91306	1.44146	0.306578	0.513459	none
119955	CHRNB4	2.91272	3.07917	0.242413	0.615444	none
119954	PAPOLB	2.91139	3.8674	0.197811	0.703751	none
119953	ZNRF1	2.91134	2.40486	0.278093	0.55581	none
119952	PAK2	2.91099	5.0868	0.168462	0.773497	none
119951	FAM86C1	2.9107	1.83753	0.298005	0.525777	none
119950	LYPD4	2.90944	1.43966	0.307146	0.512655	none
119949	NDUFB7	2.90908	2.30321	0.282634	0.548775	none
119948	PRKAG3	2.9088	2.11442	0.290137	0.537397	none
119947	C5orf15	2.90827	1.30143	0.309016	0.51002	none
119946	CNTNAP4	2.90819	1.49847	0.305991	0.514291	none
119945	MAP4K4	2.90793	0.81665	0.312688	0.504889	none
119944	AKNAD1	2.90727	2.60846	0.269414	0.56958	none
119943	hsa-mir-6747	2.90696	2.34542	0.281247	0.550912	none
119942	ZNF333	2.90687	1.63942	0.303152	0.518339	none
119941	C1orf204	2.90655	3.54495	0.216497	0.664547	none
119940	TMEM64	2.90593	2.65914	0.266783	0.573842	none
119939	hsa-mir-135a-1	2.90587	1.39246	0.308319	0.510999	none
119938	RPL30	2.90547	1.54252	0.305499	0.51499	none
119937	CLIC1	2.90466	2.71318	0.264085	0.578257	none
119936	DGCR2	2.90447	2.76482	0.261271	0.582909	none
119935	MRC1	2.90365	6.09961	0.168594	0.773158	none
119934	RCE1	2.90358	3.27383	0.232358	0.633843	none
119933	POLE	2.90311	1.93742	0.296134	0.528511	none
119932	CCL1	2.90291	2.57749	0.271549	0.566152	none
119931	DDX42	2.90205	0.874275	0.31337	0.503943	none
119930	HK1	2.90029	3.54953	0.216716	0.66411	none
119929	GPR21	2.89905	2.55614	0.273154	0.563592	none
119928	VPS29	2.89704	1.65046	0.304332	0.516653	none
119927	FMO5	2.89691	1.41706	0.309371	0.50952	none
119926	NonTargetingControlGuideForHuman_0865	2.89522	-0.32588	0.314223	0.502762	none
119925	CEP290	2.89433	0.833287	0.314549	0.502312	none
119924	CDIP1	2.89396	2.5428	0.274632	0.561249	none
119923	CAPZA3	2.89386	2.83088	0.259141	0.586464	none
119922	TLN1	2.89299	1.62982	0.305394	0.515139	none
119921	DNTTIP2	2.8923	-0.685162	0.314142	0.502874	none
119920	GBAS	2.8917	2.54214	0.275019	0.560638	none
119919	POLB	2.89029	0.952495	0.314857	0.501887	none
119918	C3orf37	2.88962	0.956591	0.314895	0.501835	none
119917	CHST3	2.88956	0.185636	0.316406	0.499755	none
119916	SKP1	2.88899	1.5586	0.307543	0.512094	none
119915	MYH15	2.88824	3.83458	0.202663	0.693226	none
119914	VMA21	2.888	1.9722	0.297288	0.526823	none
119913	hsa-mir-4638	2.88703	1.49308	0.309285	0.509641	none
119912	HPN	2.88691	5.35557	0.170365	0.76862	none
119911	SPERT	2.88669	2.10807	0.293504	0.532385	none
119910	HIST2H4B	2.88661	2.18232	0.290997	0.536112	none
119909	PSG6	2.88649	1.78761	0.303012	0.51854	none
119908	TRPC5	2.88526	2.98695	0.251565	0.59935	none
119907	PIP5KL1	2.88505	0.741976	0.316237	0.499987	none
119906	GPR142	2.88468	-0.0182535	0.316025	0.500279	none
119905	CHTOP	2.88439	2.56657	0.274761	0.561045	none
119904	SOX10	2.88371	2.00215	0.297089	0.527113	none
119903	COIL	2.88352	4.33362	0.181562	0.740976	none
119902	GDAP1L1	2.88317	4.48661	0.178278	0.748902	none
119901	RFX5	2.88297	3.40902	0.227316	0.64337	none
119900	SYF2	2.88239	1.64928	0.306598	0.51343	none
119899	SCYL2	2.88066	1.24798	0.313575	0.503659	none
119898	UNC5D	2.8805	1.84857	0.302068	0.519895	none
119897	hsa-mir-626	2.87962	-0.32215	0.316395	0.499771	none
119896	CXorf27	2.87939	2.82626	0.261482	0.582559	none
119895	NINJ2	2.87891	4.41472	0.183454	0.736473	none
119894	TRUB1	2.87852	1.10605	0.315662	0.500778	none
119893	CMC2	2.87841	1.2607	0.313834	0.5033	none
119892	hsa-mir-7161	2.87807	2.34527	0.285448	0.544473	none
119891	CDC42EP4	2.87786	3.72945	0.209756	0.678286	none
119890	CORO1B	2.87768	2.18401	0.292275	0.534208	none
119889	hsa-mir-3976	2.87749	1.79253	0.30421	0.516827	none
119888	PTF1A	2.87668	3.97852	0.196531	0.70657	none
119887	TSPAN18	2.87642	2.99183	0.252603	0.597562	none
119886	SMCR8	2.87621	1.795	0.304308	0.516687	none
119885	MEIS1	2.87538	2.35572	0.28537	0.544591	none
119884	PIGK	2.875	1.45713	0.31177	0.506166	none
119883	hsa-mir-1268a	2.875	1.85796	0.302647	0.519064	none
119882	PRND	2.87438	2.34581	0.285986	0.543655	none
119881	TMEM151A	2.87275	1.66935	0.307563	0.512066	none
119880	COASY	2.8727	3.26015	0.237486	0.624362	none
119879	CHRNA1	2.87233	4.56269	0.178217	0.749051	none
119878	GLYR1	2.87188	4.15625	0.190404	0.720323	none
119877	SLC6A15	2.87139	3.12082	0.24592	0.609206	none
119876	CGA	2.87131	2.37772	0.285068	0.545051	none
119875	COMTD1	2.8711	1.60354	0.309244	0.509699	none
119874	POM121L2	2.86959	1.78476	0.305602	0.514844	none
119873	OR6C65	2.86957	2.155	0.294702	0.530618	none
119872	SPATS2	2.86941	4.28603	0.18528	0.732171	none
119871	FGF13	2.86829	1.34872	0.31438	0.502546	none
119870	MBD1	2.86806	1.17588	0.316397	0.499767	none
119869	C7	2.86765	3.53805	0.2219	0.653842	none
119868	IQCF2	2.86678	2.80398	0.264553	0.577487	none
119867	WFDC12	2.86666	2.17555	0.294228	0.531316	none
119866	LARS2	2.8662	0.648632	0.319356	0.495724	none
119865	MRP63	2.86488	1.06991	0.318064	0.497486	none
119864	STK38L	2.86393	0.974104	0.318558	0.496812	none
119863	SPATA31C2	2.8637	2.89076	0.260192	0.584707	none
119862	CYTH3	2.86316	1.87056	0.304107	0.516974	none
119861	PCDHGA6	2.86221	0.644297	0.319975	0.494885	none
119860	HAUS2	2.86174	2.93268	0.258058	0.588284	none
119859	TRIO	2.86132	2.87931	0.261158	0.583096	none
119858	RBM42	2.86043	2.04946	0.299137	0.52413	none
119857	hsa-mir-548as	2.86018	0.0717261	0.320658	0.493958	none
119856	ITGB7	2.86002	6.07047	0.174251	0.758824	none
119855	DPF2	2.85996	3.2787	0.238218	0.623025	none
119854	KDM1A	2.85986	2.51754	0.280943	0.551382	none
119853	TGIF2LX	2.85869	0.75617	0.32005	0.494782	none
119852	TCOF1	2.85841	1.33486	0.31603	0.500271	none
119851	RPL32	2.85774	2.32134	0.28944	0.538441	none
119850	PTGER3	2.85748	0.306716	0.321532	0.492775	none
119849	hsa-mir-4687	2.85667	3.75505	0.211383	0.67493	none
119848	ORC2	2.85602	2.68199	0.272903	0.563991	none
119847	LGALS7B	2.85584	3.3165	0.236604	0.625978	none
119846	MFSD5	2.8557	2.06476	0.29939	0.523763	none
119845	ACTN4	2.85518	1.13322	0.318679	0.496646	none
119844	hsa-mir-4754	2.85487	3.00628	0.254861	0.593697	none
119843	XRCC6BP1	2.85487	3.47697	0.227511	0.642998	none
119842	hsa-mir-4800	2.85486	1.49667	0.31391	0.503194	none
119841	NOTCH2NL	2.85483	2.61626	0.276485	0.558328	none
119840	CNTN1	2.85443	2.51344	0.281924	0.549867	none
119839	CALHM3	2.85395	3.44033	0.22961	0.639008	none
119838	EIF2S1	2.85341	0.857295	0.320613	0.494019	none
119837	KIAA0317	2.85332	3.82371	0.208152	0.681619	none
119836	KIAA0196	2.85326	3.81756	0.208438	0.681022	none
119835	S1PR2	2.8525	3.33105	0.23652	0.626133	none
119834	TINF2	2.85097	2.846	0.264517	0.577547	none
119833	FGFRL1	2.85084	2.51525	0.282408	0.549124	none
119832	VGLL2	2.85071	2.66407	0.274686	0.561164	none
119831	FIGN	2.85027	1.42146	0.316296	0.499906	none
119830	hsa-mir-365b	2.85011	2.13654	0.298129	0.525595	none
119829	ARHGEF25	2.84978	1.5848	0.312764	0.504783	none
119828	DTX3L	2.84974	1.8516	0.306593	0.513438	none
119827	VSTM5	2.84889	4.21168	0.191186	0.718545	none
119826	SLC5A8	2.84851	2.17874	0.296812	0.527518	none
119825	CLDN5	2.84828	3.15131	0.247494	0.606435	none
119824	ZKSCAN2	2.84777	2.64377	0.276089	0.558951	none
119823	TXNDC2	2.84715	4.62532	0.180344	0.743898	none
119822	LGALS14	2.84469	2.75039	0.270805	0.567343	none
119821	TMEM231	2.84436	1.37538	0.317694	0.497991	none
119820	UPK3B	2.84406	2.05168	0.301525	0.520676	none
119819	EXOSC3	2.84372	5.00177	0.177679	0.750365	none
119818	KPNA4	2.84364	2.99928	0.257152	0.58981	none
119817	CD3G	2.8431	2.8137	0.267683	0.572379	none
119816	NIPA1	2.84297	3.27813	0.240795	0.618353	none
119815	NEUROD2	2.84272	5.6086	0.175938	0.754639	none
119814	WDR45	2.84234	1.47899	0.316182	0.500063	none
119813	TESK2	2.84206	2.03283	0.30234	0.519505	none
119812	OR2T29	2.84201	0.802714	0.322364	0.491653	none
119811	ITGB7	2.84192	-0.0175843	0.323143	0.490605	none
119810	GNG2	2.83962	2.38268	0.289584	0.538225	none
119809	RRP9	2.83923	0.634666	0.323264	0.490443	none
119808	DAGLA	2.83888	5.43732	0.177959	0.749679	none
119807	ABTB1	2.83871	3.294	0.240442	0.61899	none
119806	PSIP1	2.83798	-0.364367	0.322543	0.491412	none
119805	OSR2	2.83714	2.03367	0.303035	0.518507	none
119804	MLEC	2.83707	1.37606	0.318785	0.496502	none
119803	DCAF13	2.83674	3.98135	0.201853	0.694964	none
119802	LRRC16B	2.83463	3.72217	0.216251	0.665043	none
119801	CA14	2.83345	3.28432	0.241909	0.616348	none
119800	hsa-mir-7975	2.8331	1.73771	0.312039	0.505791	none
119799	IL15RA	2.83257	1.59942	0.315064	0.501601	none
119798	ALG8	2.83194	3.49075	0.229812	0.638627	none
119797	BAAT	2.8316	3.10038	0.252886	0.597076	none
119796	CRYAA	2.83064	2.2531	0.296344	0.528204	none
119795	NUDT17	2.82995	2.07128	0.30305	0.518486	none
119794	C1orf115	2.8299	2.9248	0.263255	0.579623	none
119793	ARGLU1	2.82981	-2.07902	0.321035	0.493448	none
119792	C19orf71	2.8298	2.20858	0.298376	0.525236	none
119791	EIF3M	2.82933	1.66959	0.314052	0.502999	none
119790	GORASP1	2.82915	0.971692	0.32377	0.489763	none
119789	MAF	2.82882	4.32778	0.189164	0.723162	none
119788	APRT	2.8284	4.25257	0.192294	0.716034	none
119787	LACC1	2.8283	0.295995	0.326022	0.486753	none
119786	TEX13B	2.82711	3.67307	0.220004	0.65757	none
119785	SLX4	2.82708	3.8871	0.208526	0.68084	none
119784	AGFG2	2.82664	0.899051	0.324504	0.48878	none
119783	PAK3	2.82615	4.33194	0.189354	0.722725	none
119782	CILP	2.8259	0.646213	0.325369	0.487623	none
119781	LMF2	2.8258	2.18475	0.300097	0.522738	none
119780	PHACTR2	2.82573	5.2101	0.179936	0.744882	none
119779	UBE2N	2.82563	2.07163	0.30369	0.51757	none
119778	PALMD	2.82554	2.61448	0.280966	0.551346	none
119777	BEST4	2.825	1.27745	0.321701	0.492547	none
119776	CBX3	2.82376	2.1865	0.300181	0.522617	none
119775	UGT1A7	2.82341	1.13821	0.323473	0.490161	none
119774	TOMM34	2.82329	2.9256	0.264489	0.577592	none
119773	PAN3	2.82245	1.05155	0.324653	0.488581	none
119772	CD3D	2.82244	2.0554	0.304673	0.516166	none
119771	ARMCX3	2.82215	2.6219	0.281088	0.551158	none
119770	NOC3L	2.8219	1.2716	0.322222	0.491845	none
119769	H2AFX	2.82166	2.53773	0.285592	0.544254	none
119768	MLKL	2.82137	1.55961	0.317551	0.498187	none
119767	GIF	2.82107	0.789981	0.325602	0.487313	none
119766	RNF2	2.82085	3.90822	0.208143	0.681637	none
119765	RTTN	2.81985	2.02515	0.305939	0.514365	none
119764	FLNC	2.81963	3.15174	0.251722	0.599079	none
119763	CYP2U1	2.81857	4.90329	0.181552	0.740999	none
119762	PARP2	2.81835	1.57496	0.317729	0.497943	none
119761	SLC23A1	2.81762	3.43188	0.235496	0.628016	none
119760	OXCT1	2.81727	1.56013	0.318259	0.497219	none
119759	HSD17B14	2.81686	2.52852	0.286835	0.542368	none
119758	DEFB103B	2.81663	4.47978	0.187439	0.727139	none
119757	PPIL6	2.81599	2.21526	0.300142	0.522673	none
119756	FOXP3	2.81592	0.0492317	0.327041	0.485398	none
119755	CLCNKA	2.81535	3.442	0.235102	0.628744	none
119754	ZFR2	2.81515	2.35173	0.29452	0.530886	none
119753	CHAD	2.81497	1.60866	0.317554	0.498182	none
119752	DENND4B	2.81416	3.46461	0.234069	0.630657	none
119751	WDR66	2.81399	2.10119	0.304566	0.516318	none
119750	PVALB	2.8135	1.82161	0.312971	0.504495	none
119749	CEBPZ	2.8135	2.39646	0.29293	0.533236	none
119748	NTPCR	2.81321	3.74446	0.218151	0.661242	none
119747	TOP3B	2.81269	3.84011	0.213016	0.671587	none
119746	INVS	2.81253	1.90391	0.310643	0.507739	none
119745	hsa-mir-1229	2.81156	2.38315	0.293767	0.531997	none
119744	TEX22	2.81156	1.99863	0.307972	0.511489	none
119743	OR4E2	2.81154	2.03988	0.306765	0.513194	none
119742	GDE1	2.81135	3.71596	0.21994	0.657696	none
119741	CHP1	2.81097	2.01297	0.307598	0.512016	none
119740	MTSS1L	2.8095	1.54063	0.319778	0.495151	none
119739	hsa-mir-3154	2.80939	1.6279	0.317936	0.49766	none
119738	TRAPPC6B	2.80846	3.65002	0.223912	0.649922	none
119737	WDR33	2.80844	1.16919	0.325433	0.487538	none
119736	HAUS7	2.80711	1.17007	0.325649	0.487251	none
119735	hsa-let-7g	2.8065	1.40151	0.323073	0.490699	none
119734	COPS6	2.80566	1.87077	0.312624	0.504978	none
119733	A4GALT	2.80546	2.47328	0.290938	0.536199	none
119732	ATP5L2	2.80463	1.30299	0.324434	0.488873	none
119731	BRDT	2.80448	1.62759	0.318686	0.496637	none
119730	SLC22A10	2.80231	1.51937	0.321403	0.492951	none
119729	HOXC4	2.80194	0.982976	0.327902	0.484256	none
119728	TRIM77	2.80182	5.559	0.181427	0.741299	none
119727	TMEM208	2.8008	1.07923	0.327603	0.484652	none
119726	PCSK1	2.79865	1.89607	0.312983	0.50448	none
119725	DDX18	2.79854	2.48994	0.291311	0.535643	none
119724	UQCRFS1	2.79804	1.17801	0.326923	0.485554	none
119723	hsa-mir-384	2.79803	2.65413	0.283029	0.548169	none
119722	CCL4	2.79788	2.85388	0.272025	0.565392	none
119721	MAP4K1	2.79716	2.3224	0.298503	0.525051	none
119720	C20orf85	2.79695	2.98794	0.264523	0.577537	none
119719	OSGEP	2.79663	5.2383	0.182982	0.737591	none
119718	TRAP1	2.79613	3.98358	0.207517	0.682947	none
119717	EHD1	2.79573	0.678993	0.32971	0.481868	none
119716	GJB4	2.79552	2.51448	0.290759	0.536466	none
119715	AQP12B	2.79535	0.54652	0.330418	0.480936	none
119714	LIPE	2.79529	1.26755	0.326337	0.486334	none
119713	DRAXIN	2.79497	2.72154	0.279886	0.553018	none
119712	PPP1R14A	2.794	3.92822	0.210829	0.676069	none
119711	RGL1	2.79384	1.05561	0.328893	0.482945	none
119710	NonTargetingControlGuideForHuman_0649	2.79329	2.97881	0.265626	0.57573	none
119709	TERF2IP	2.79288	2.10002	0.307896	0.511596	none
119708	hsa-mir-6756	2.79273	1.09272	0.328736	0.483153	none
119707	C14orf119	2.79265	2.39337	0.296265	0.52832	none
119706	NonTargetingControlGuideForHuman_0806	2.79244	0.209972	0.331234	0.479865	none
119705	TMEM252	2.79215	1.61459	0.320854	0.493692	none
119704	SLC38A4	2.7921	0.978728	0.329471	0.482183	none
119703	ARL11	2.79206	2.80338	0.275767	0.559458	none
119702	NHSL1	2.79136	1.88631	0.314378	0.502548	none
119701	TTC23L	2.79106	1.30299	0.326507	0.486108	none
119700	WDR66	2.79063	2.11213	0.307852	0.511658	none
119699	ZNF281	2.79001	2.83479	0.27427	0.561822	none
119698	SARDH	2.78986	3.11945	0.25811	0.588196	none
119697	CIZ1	2.78978	1.36665	0.326011	0.486768	none
119696	HIGD1A	2.78925	3.51875	0.234405	0.630034	none
119695	MSGN1	2.7891	1.54885	0.322806	0.491059	none
119694	ERN1	2.78865	3.86318	0.215352	0.666851	none
119693	CMTM1	2.7885	2.69325	0.282558	0.548893	none
119692	SUMO1	2.78838	2.55186	0.290007	0.537591	none
119691	RSPH10B2	2.78834	1.04134	0.329874	0.481652	none
119690	BCAS2	2.78823	1.57943	0.322216	0.491853	none
119689	CLCN5	2.78753	2.48277	0.293254	0.532756	none
119688	TAS2R38	2.78752	2.40449	0.296528	0.527934	none
119687	C9orf153	2.7873	1.10878	0.329334	0.482364	none
119686	TLCD1	2.78721	2.23661	0.303635	0.517648	none
119685	MRFAP1	2.78707	2.52574	0.291474	0.5354	none
119684	CCDC89	2.78565	1.73431	0.319331	0.495759	none
119683	CLDN11	2.78541	2.54835	0.290552	0.536776	none
119682	GPR37L1	2.78535	3.59517	0.23042	0.637479	none
119681	C4orf48	2.78496	2.2957	0.301681	0.520452	none
119680	APEX2	2.78487	3.87745	0.214942	0.667678	none
119679	GRM4	2.78483	0.659129	0.331538	0.479466	none
119678	HCST	2.78465	2.68641	0.28337	0.547646	none
119677	NonTargetingControlGuideForHuman_0736	2.78454	-0.151753	0.331435	0.479602	none
119676	OR6C1	2.78447	4.58489	0.189775	0.72176	none
119675	ABCB5	2.78427	3.26872	0.250843	0.600597	none
119674	USP37	2.78408	4.62849	0.188967	0.723615	none
119673	GPHB5	2.78318	2.02736	0.311465	0.50659	none
119672	SPAST	2.78233	3.38137	0.243695	0.613153	none
119671	SWAP70	2.7819	1.85691	0.316682	0.499376	none
119670	MPV17L	2.78113	1.63546	0.322126	0.491975	none
119669	GTF3C4	2.78086	2.89852	0.272101	0.56527	none
119668	PRKCG	2.78071	2.54091	0.291647	0.535142	none
119667	DPP4	2.77804	2.80687	0.278018	0.555926	none
119666	CYP11A1	2.77789	2.5424	0.292032	0.53457	none
119665	RAVER1	2.77749	1.09352	0.330984	0.480193	none
119664	MORC3	2.77727	0.571221	0.333099	0.477426	none
119663	AP3B1	2.77662	2.0511	0.311789	0.506139	none
119662	PRRC2C	2.77587	3.00931	0.266546	0.574228	none
119661	NonTargetingControlGuideForHuman_0600	2.77382	-0.341743	0.332452	0.478271	none
119660	KIAA0195	2.77328	1.9973	0.313879	0.503238	none
119659	CSTL1	2.77325	2.71779	0.283463	0.547504	none
119658	TCP11L1	2.77255	2.10272	0.310896	0.507384	none
119657	hsa-mir-551a	2.77241	5.28792	0.186116	0.730216	none
119656	ARL14EP	2.77159	2.61169	0.289358	0.538565	none
119655	AAMP	2.77141	0.677137	0.333667	0.476687	none
119654	NOA1	2.7714	2.19217	0.307944	0.511529	none
119653	TGM3	2.77126	2.71296	0.283981	0.54671	none
119652	ATP2B1	2.7708	1.55743	0.325393	0.487591	none
119651	DGKZ	2.77052	-0.59521	0.33246	0.478261	none
119650	TCP11	2.77023	4.25015	0.201089	0.696611	none
119649	DHRS1	2.77	2.87481	0.275286	0.560216	none
119648	ALG9	2.76999	1.52712	0.326192	0.486527	none
119647	C17orf58	2.76984	2.38457	0.300113	0.522715	none
119646	SPAG16	2.76976	2.66407	0.286829	0.542376	none
119645	RAB3GAP2	2.76952	1.85436	0.318686	0.496637	none
119644	TMEM158	2.76902	3.58486	0.233635	0.631461	none
119643	GMEB2	2.76862	0.996389	0.33303	0.477516	none
119642	FBLIM1	2.7684	1.39447	0.329002	0.482801	none
119641	C6orf195	2.76832	1.98043	0.315124	0.501518	none
119640	DCT	2.76816	4.84291	0.188848	0.723888	none
119639	PSMB5	2.7681	1.83298	0.319545	0.495468	none
119638	ASPG	2.76797	2.29761	0.304068	0.51703	none
119637	COQ10A	2.76745	1.0211	0.333121	0.477398	none
119636	DIP2A	2.76711	1.5687	0.325695	0.487189	none
119635	SPSB3	2.76657	1.6667	0.323688	0.489873	none
119634	DET1	2.76645	1.91495	0.317371	0.498433	none
119633	COL4A1	2.76628	7.28384	0.19111	0.718717	none
119632	NXF2B	2.76586	2.57072	0.292343	0.534107	none
119631	BATF3	2.76487	2.47873	0.296929	0.527347	none
119630	TCTN2	2.76404	4.62599	0.19185	0.717037	none
119629	C8orf33	2.76388	2.37461	0.301441	0.520797	none
119628	LCN8	2.76365	1.7232	0.322932	0.490889	none
119627	OR5L2	2.76311	1.61327	0.325378	0.487612	none
119626	AMZ1	2.76286	3.59348	0.233873	0.631021	none
119625	F8	2.76144	2.64465	0.289129	0.538908	none
119624	AEN	2.76133	-0.329956	0.334218	0.47597	none
119623	RAB6C	2.76091	1.28657	0.331357	0.479703	none
119622	NDUFAF5	2.7604	-0.472141	0.334377	0.475764	none
119621	C3orf72	2.75974	2.85211	0.277946	0.55604	none
119620	HYI	2.75925	1.32685	0.331203	0.479906	none
119619	NonTargetingControlGuideForHuman_0457	2.75809	2.869	0.277308	0.557038	none
119618	STAP1	2.75808	1.70068	0.324283	0.489076	none
119617	SAR1B	2.75779	1.86594	0.320165	0.494626	none
119616	CDR2L	2.75755	1.10706	0.333925	0.476351	none
119615	GPATCH4	2.75754	2.32873	0.304369	0.516599	none
119614	SIN3B	2.75722	2.30757	0.305314	0.515253	none
119613	YKT6	2.75703	-0.493375	0.334933	0.475042	none
119612	hsa-mir-30c-1	2.75635	1.44193	0.330161	0.481274	none
119611	SNRPA	2.75622	0.431453	0.336844	0.472571	none
119610	TEX30	2.75617	1.54635	0.327887	0.484276	none
119609	NonTargetingControlGuideForHuman_0231	2.75586	0.00982618	0.336398	0.473147	none
119608	NUDT9	2.75532	2.64145	0.290332	0.537105	none
119607	OR8G5	2.755	2.39303	0.302053	0.519916	none
119606	PRAC	2.75443	2.96382	0.272408	0.56478	none
119605	FAM110A	2.7542	2.79084	0.282283	0.549316	none
119604	KIF20A	2.75411	1.32026	0.332058	0.478786	none
119603	hsa-mir-4421	2.75389	2.72252	0.286099	0.543484	none
119602	hsa-mir-6715b	2.75287	0.19398	0.337354	0.471914	none
119601	CCDC73	2.75266	0.791044	0.336184	0.473423	none
119600	ABAT	2.75127	6.13119	0.189322	0.7228	none
119599	UBN2	2.75064	1.05992	0.335575	0.474211	none
119598	NPTXR	2.74978	0.991545	0.336029	0.473623	none
119597	HRSP12	2.74819	3.46834	0.243578	0.613363	none
119596	CCL14	2.74758	1.74226	0.325047	0.488054	none
119595	UBE2V1	2.74751	3.03612	0.269337	0.569703	none
119594	hsa-mir-4324	2.74748	-1.23086	0.335228	0.474659	none
119593	METTL2A	2.74703	2.5545	0.296151	0.528488	none
119592	ULBP2	2.74699	3.119	0.264595	0.577418	none
119591	AFP	2.74604	1.66392	0.326957	0.485509	none
119590	MYCL	2.746	-1.2796	0.33459	0.475488	none
119589	MYBPHL	2.74526	2.62791	0.292552	0.533797	none
119588	PDE8B	2.74463	3.2154	0.259235	0.586307	none
119587	ZNF598	2.74436	1.92309	0.320599	0.494038	none
119586	UAP1L1	2.74425	1.28776	0.333917	0.476361	none
119585	SLC26A5	2.74297	6.29319	0.190913	0.719164	none
119584	PEX12	2.74233	3.12445	0.264959	0.576821	none
119583	RPS3A	2.74193	0.46438	0.338945	0.469871	none
119582	ADAMTS15	2.74166	1.21279	0.335203	0.474692	none
119581	DYNC1I1	2.74059	2.08861	0.316331	0.499859	none
119580	PDIA4	2.74041	2.14688	0.314649	0.502173	none
119579	EML1	2.74019	2.4454	0.302167	0.519754	none
119578	TYW3	2.73981	3.71354	0.230752	0.636855	none
119577	LPAR1	2.73945	0.19255	0.339464	0.469207	none
119576	PTGES3	2.73808	3.49404	0.243582	0.613354	none
119575	MICALL2	2.73761	1.4035	0.3337	0.476644	none
119574	LCE3E	2.73745	2.74675	0.287324	0.541628	none
119573	FAM210A	2.73735	1.84242	0.32408	0.489348	none
119572	NIT2	2.73729	-0.0829304	0.339093	0.469682	none
119571	KRT23	2.73694	1.0686	0.337694	0.471477	none
119570	PELI3	2.7358	2.43599	0.303313	0.518109	none
119569	FARSA	2.73559	3.0166	0.272289	0.564969	none
119568	ZDHHC15	2.73549	3.47814	0.244929	0.61096	none
119567	POPDC3	2.73523	2.99714	0.273821	0.562534	none
119566	FAM83G	2.7352	2.59352	0.295939	0.528797	none
119565	AADACL3	2.73446	1.77653	0.326431	0.486208	none
119564	KRTAP1-5	2.73341	2.58038	0.296913	0.527371	none
119563	CAMLG	2.73322	3.27232	0.257541	0.589153	none
119562	B4GALNT3	2.73316	1.23982	0.336269	0.473313	none
119561	LCA5L	2.73201	1.10583	0.337942	0.471158	none
119560	KCNV2	2.7319	4.96002	0.193481	0.713361	none
119559	PIM3	2.73166	2.74975	0.288074	0.540496	none
119558	NOP9	2.73139	1.40547	0.334694	0.475352	none
119557	SRY	2.73119	0.0916992	0.340395	0.468017	none
119556	PDE4C	2.73097	0.269482	0.340876	0.467404	none
119555	CCNE2	2.7307	5.4247	0.191405	0.718046	none
119554	SLURP1	2.72926	2.28963	0.310474	0.507974	none
119553	PTPRN	2.72892	2.84853	0.282949	0.548292	none
119552	hsa-mir-5700	2.72862	2.3838	0.306575	0.513463	none
119551	C22orf28	2.7282	2.76712	0.287764	0.540964	none
119550	RBMY1D	2.72701	0.691117	0.340507	0.467874	none
119549	NRG4	2.72689	2.10105	0.318083	0.497459	none
119548	KLHL36	2.72674	1.75189	0.328108	0.483984	none
119547	KCNK15	2.72644	2.79161	0.286567	0.542773	none
119546	OR8H3	2.72627	1.00697	0.339611	0.469019	none
119545	hsa-mir-1297	2.72602	-0.425335	0.339903	0.468645	none
119544	LRRC37B	2.72529	1.00671	0.339729	0.468867	none
119543	CHRNA5	2.72502	1.76771	0.328032	0.484083	none
119542	MARCKSL1	2.72491	2.58577	0.297947	0.525861	none
119541	RAB6A	2.72471	1.41329	0.335688	0.474064	none
[truncated: 119,540 more rows]

## Sheet: Table_1_C_GO-Analysis
Gene	BP		MF		CC
PLEKHA5	GO:006145		GO:0032266		GO:0005829
			GO:0010314
			GO:0070273
RANBP3L	GO:0045668		GO:0005515		GO:0005634
	GO:0045663		GO:0046332		GO:0005737
APBB3	GO:0050714		GO:0050750		GO:0005634
	GO:0006355		GO:0001540		GO:0005829
			GO:0005515		GO:0015629
PRDX5	GO:0034599		GO:0051920		GO:0005829
	GO:0098869		GO:0008379		GO:0005759
	GO:0006915		GO:0005515
C9orf139
CHST4	GO:0005975		GO:0008146		GO:0000139
	GO:0006954		GO:0016740		GO:0016020
	GO:0007267		GO:0001517		GO:0005794
TAS2R30	GO:0001580		GO:0033038		GO:0005886
	GO:0007186		GO:0033038		GO:0016020
	GO:0050909		GO:0004930		GO:0016021
FBXL15	GO:0030282		GO:0005515		GO:0005829
	GO:0031146				GO:0019005
	GO:0016567
hsa-mir-6510
MTMR2	GO:0046856		GO:0004438		GO:000582
	GO:0006629		GO:0052629		GO:0005737
	GO:0006661		GO:0016787		GO:0016020
ETV7	GO:0006355		GO:0003677		GO:0005634
	GO:0006366		GO:0001227
	GO:0030154		GO:0003700
SNRPE	GO:0000398		GO:0003723		GO:0005681
	GO:0008380		GO:0005515		GO:0005634
	GO:0006397				GO:0005654
GOLGA8O	GO:0007030		GO:0005515		GO:0005801
					GO:0005794
					GO:0032580
NKX2-2	GO:0006355		GO:0005515		GO:0007030
	GO:0030154		GO:0001228
	GO:0010628
KDELR2	GO:0006888		GO:0046923		GO:0005783
	GO:0006621		GO:0005046		GO:0000139
	GO:0006890				GO:0005801
SH3BGR	GO:0065003		GO:0017124		GO:0005829
hsa-mir-4765
FAM76B
CCDC61	GO:0030030		GO:0005515		GO:0005813
	GO:0098534			GO:0008017	GO:0005815
	GO:0090307				GO:0120103
UNC45A	GO:0007517		GO:0005515		GO:0005829
	GO:0061077		GO:0045296		GO:0005634
	GO:0030154		GO:0051879		GO:0005794
SFSWAP	GO:0000395		GO:0003723		GO:0005634
	GO:0048025		GO:0005515
	GO:0006396
GALNT2	GO:0006493		GO:0004653		GO:0005794
	GO:001626		GO:0005515		GO:0000139
	GO:0006486		GO:0046872		GO:001602
ALDH2	GO:0046185		GO:0004029		GO:0005739
	GO:0006066		GO:0016491		GO:0005759
	GO:0005975
NDUFAF3	GO:0032981			GO:0005515	GO:0005739
					GO:0005634
					GO:0005743
TRPV2	GO:0070588		GO:0005261		GO:0005886
		GO:0120162	GO:0005262
	GO:0090280		GO:0005216
TMEM110	GO:0032237		GO:0005246		GO:0140268
	GO:0035584		GO:0005515		GO:0005783
	GO:0070886
ZNF544	GO:0006355		GO:0001228		GO:0005634
	GO:0006357		GO:0005515
	GO:0045944		GO:0046872
TM9SF4	GO:0072657		GO:0005515		GO:0005794
	GO:0070863				GO:0016021
	GO:0051453				GO:0005768
LOC646862
KRTAP3-3			GO:0005198		GO:0045095
			GO:0005515		GO:0005882
					GO:0005829
CALM2	GO:1905949		GO:0005509		GO:0008076
	GO:1901387		GO:1901020		GO:0005829
			GO:0050848
C8orf47
ZNF680	GO:0006357		GO:0000981		GO:0005634
	GO:0006355		GO:0003677
			GO:0000978
CTCFL	GO:0045944		GO:0000978
			GO:0000981
SYS1	GO:0043001		GO:0005515		GO:0005794
	GO:0006895				GO:0032588
	GO:0015031
NR1D1	GO:0006355		GO:0003700		GO:0005634
	GO:0000122		GO:0003677		GO:0005654
	GO:0007623
KRTAP4-6
hsa-let-7a-3
TBR1	GO:0006355		GO:0003700		GO:0005634
	GO:0006357		GO:0003677
	GO:0007420		GO:0005515
H3F3A	GO:0006334		GO:0000978		GO:0005634
	GO:0006336		GO:0031492		GO:0005634
	GO:0032200		GO:0005515		GO:0005654
RPLP2	GO:0006412		GO:0003735		GO:0005840
	GO:0006414		GO:0005515		GO:0022625
	GO:0002182				GO:0005829
FREM3	GO:0007155		GO:0046872		GO:0005576
	GO:0007154				GO:0005604
					GO:0016021
MYOG	GO:0007519		GO:0003700		GO:0005654
	GO:0006357		GO:0000981		GO:0005634
	GO:0007517		GO:0043565
MFRP	GO:0042462				GO:0016324
	GO:0007601				GO:0005886
					GO:0016021
AIFM2	GO:0022904		GO:0016491		GO:0005739
	GO:1900407		GO:0003677		GO:0005634
	GO:0008637		GO:0005515		GO:0005811
ZNF469	GO:0000122		GO:0003677		GO:0005634
	GO:1903053		GO:0046872
hsa-mir-346
OTUB2	GO:0016579		GO:0004843		GO:0005634
	GO:0071108		GO:0043130
	GO:0070536		GO:0005515
KPNA6	GO:0006606		GO:0008139		GO:0005634
	GO:0006607		GO:0061608		GO:0005654
	GO:0015031		GO:0005515		GO:0005829
FGF11	GO:0007399		GO:0008083		GO:0005634
	GO:0007267		GO:0005515		GO:0005737
	GO:0007165		GO:0017080
SNAP29	GO:0006887		GO:0019905		GO:0005829
	GO:0015031		GO:0005484		GO:0000139
	GO:0006906		GO:0005515		GO:0005886
DSCR3	GO:0006886		GO:0005515		GO:0005634
	GO:0032456				GO:0005768
MARCKSL1	GO:0007015		GO:0051015		GO:0005737
	GO:0007417		GO:0003779		GO:0005886
			GO:0005516		GO:0005856
MPZ	GO:0042552		GO:0005198		GO:0005886
	GO:0098742				GO:0016323
	GO:0007268				GO:0005764
NCL	GO:0048026		GO:0005515		GO:0005634
	GO:0017148		GO:0003677		GO:0005681
	GO:0045944		GO:0003723
DYM	GO:0007030		GO:0019899		GO:0005794
	GO:0060348		GO:0005515		GO:0016020
					GO:0005737
ERF	GO:0003700		GO:0006355		GO:0005634
	GO:0043565		GO:0006357		GO:0000785
	GO:0030154		GO:0000981		GO:0005654
ARPC4-TTLL3	GO:0030041		GO:0003779		GO:0005856
	GO:0034314				GO:0005737
	GO:0034314				GO:0005885
PIP5K1C	GO:0046854		GO:0016308		GO:0005886
	GO:0006887		GO:0052812		GO:0012505
	GO:0016310		GO:0016307		GO:0005829
LDHA	GO:0006089		GO:0016491		GO:0005737
	GO:0006090		GO:0004459		GO:0005829
	GO:0005975		GO:0005515		GO:1990204
NFE2L3	GO:0006355		GO:0000981		GO:0000785
	GO:0006357		GO:0003700		GO:0005634
	GO:0006366		GO:0005515		GO:0090575
HOXA4	GO:0006357		GO:0000981		GO:0005634
	GO:0006355		GO:0003700		GO:0016604
	GO:0009952		GO:0003677		GO:0000785
LHX4	GO:0006355		GO:0000981		GO:0005634
	GO:0006357		GO:0003677
			GO:0043565
hsa-mir-4686
ZNF676	GO:0006355		GO:0000978		GO:0005634
	GO:0006357		GO:0000981
			GO:0046872
C16orf97
RRN3	GO:0006361		GO:0001181		GO:0005634
	GO:0045893		GO:0001042		GO:0005654
	GO:2000142		GO:0070063		GO:0005654
APOBEC1	GO:0006397		GO:0003723		GO:0005654
	GO:0016556		GO:0003723		GO:0005634
	GO:0016554		GO:0005515		GO:0005737
TEAD1	GO:0006357		GO:0003700		GO:0000785
	GO:0006355		GO:0000981		GO:0005634
	GO:0035329
ARHGAP33	GO:0015031		GO:0005096		GO:0005829
	GO:0050790		GO:0035091		GO:0005886
	GO:0007165
COL5A1	GO:0007155		GO:0005201		GO:0031012
	GO:0030199		GO:0005178		GO:0005788
	GO:0030198		GO:0005515
CCDC42B	GO:0003341		GO:0070840		GO:0005929
	GO:0036159				GO:0005856
PTPRC	GO:0050852		GO:0004725		GO:0005886
	GO:0007166		GO:0004721		GO:0005925
	GO:0016311
RPL30	GO:0006412		GO:0003735		GO:0005840
	GO:0002181		GO:0003723		GO:0005829
					GO:0022625
TMEM106B	GO:0032418		GO:0051117		GO:0005765
	GO:0007041		GO:0005515		GO:0005768
	GO:1905146				GO:0016020
DCDC2B	GO:0035556		GO:0005515		GO:0005815
					GO:0005874
H2AFJ	GO:0031507		GO:0046982		GO:0005634
			GO:0003677		GO:0000786
					GO:0005694
KCNK9	GO:0030322		GO:0005267		GO:0016020
	GO:0006813		GO:0005249		GO:0005886
	GO:0006811
ITGA5	GO:0007155		GO:0050839		GO:0005925
	GO:0007229		GO:0046872		GO:0005886
	GO:0030335		GO:0005515		GO:0009986
hsa-mir-1254-1
ANO8	GO:0034220		GO:0005229		GO:0005886
	GO:0006821				GO:0005788
	GO:0055085				GO:0016020
SFR1	GO:0045893		GO:0030374		GO:0005634
	GO:0000724		GO:0005515		GO:0032798
	GO:0006281
RTN2	GO:0065002		GO:0005515		GO:0005783
	GO:0015031				GO:0016020
					GO:0016529
ATAD5	GO:0006974		GO:0003677		GO:0005634
	GO:0033260		GO:0005524
	GO:0090618		GO:0000166
DNAAF2	GO:0060285		GO:0005515		GO:0005829
	GO:0070286				GO:0120293
TMEM128					GO:0016020
TMF1	GO:0045944		GO:0050681		GO:0005794
	GO:0061136		GO:0003677		GO:0005634
	GO:0030521		GO:0005515
REV1	GO:0006974		GO:0003677		GO:0005654
	GO:0006281		GO:0003684		GO:0005634
	GO:0006260		GO:0003887
C2CD3	GO:0060271		GO:0005515		GO:0005814
	GO:0061511				GO:0005813
					GO:0036064
