# Supplementary figures and images for: A CRISPR screen in intestinal epithelial cells identifies novel factors for polarity and apical transport
Source: eLife journal article supplement (doi:10.7554/elife.80135), 2023-01-20

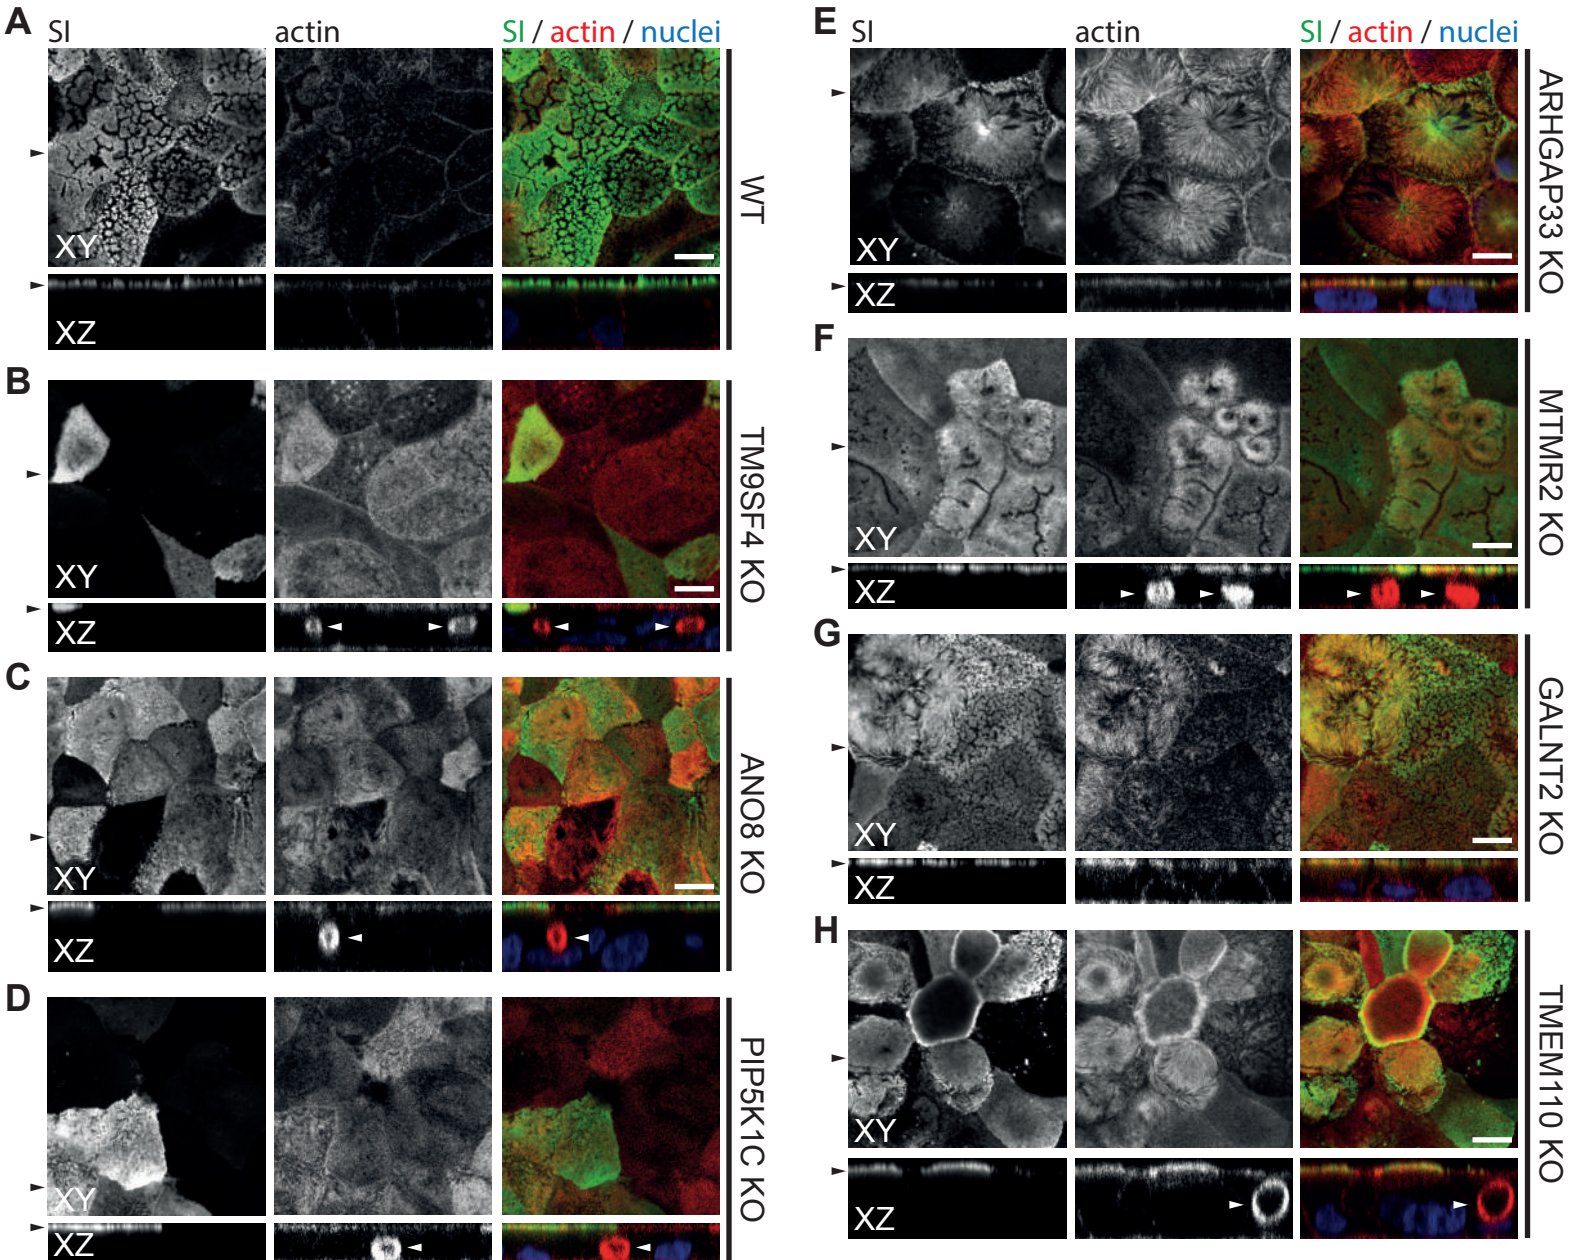

Supplement: supp [file elife-80135-supp-v1.zip]

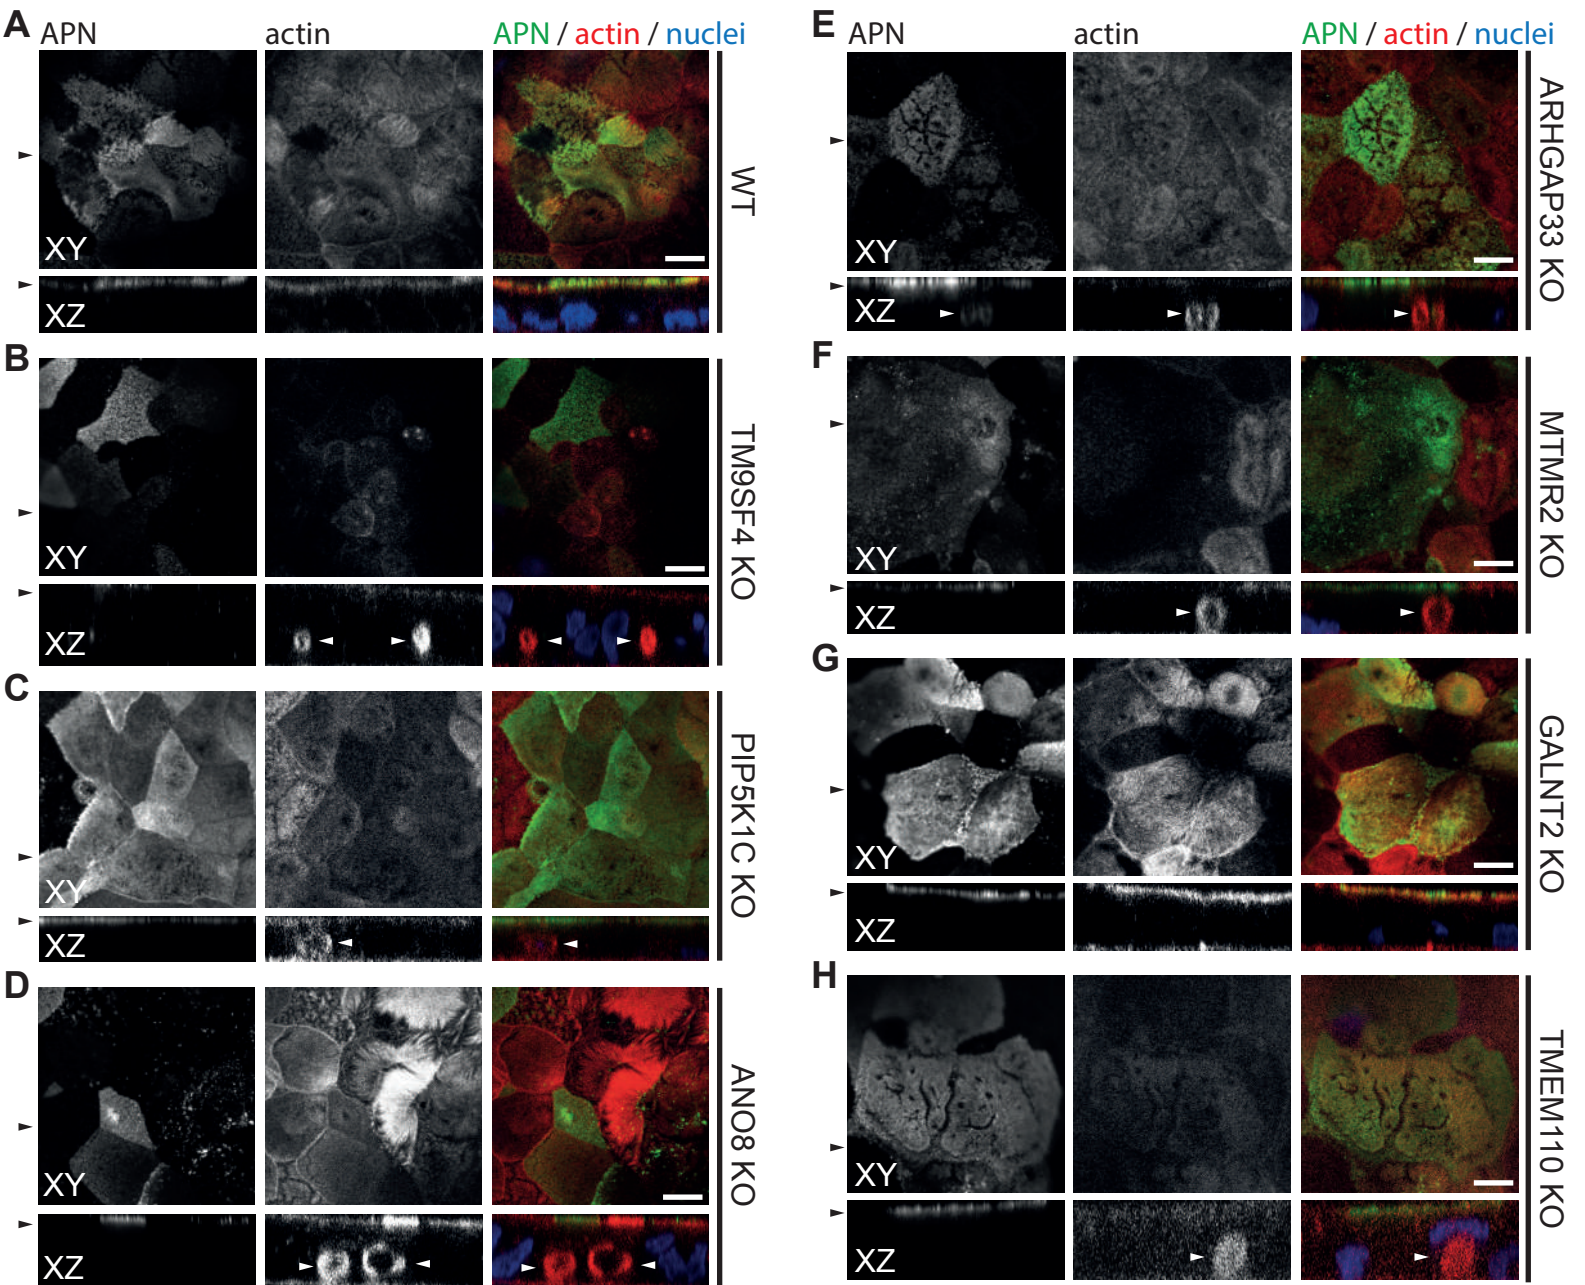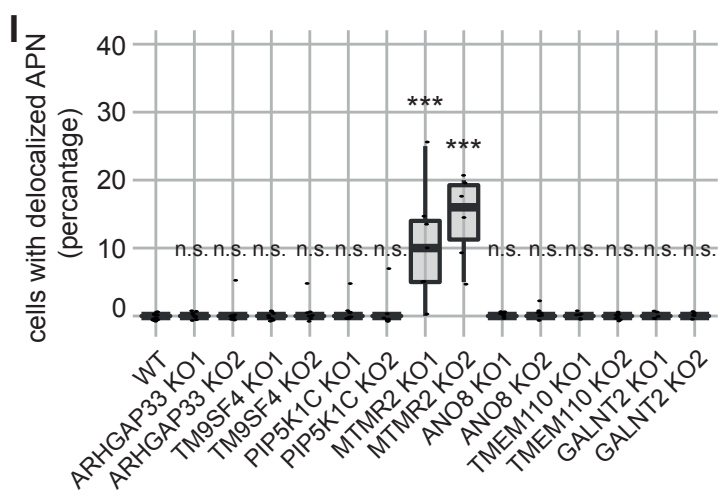

Supplement: supp [file elife-80135-supp-v1.zip]

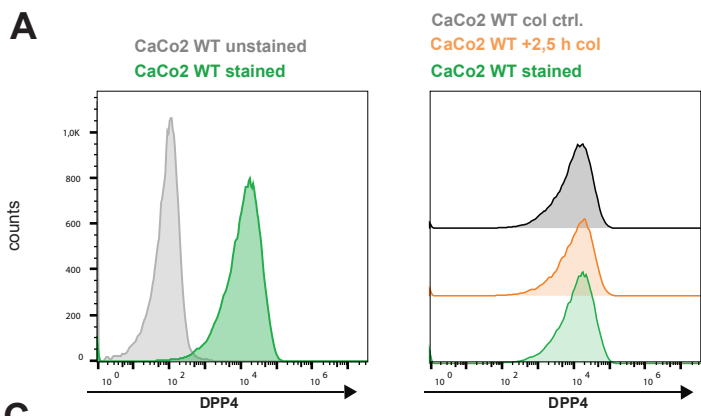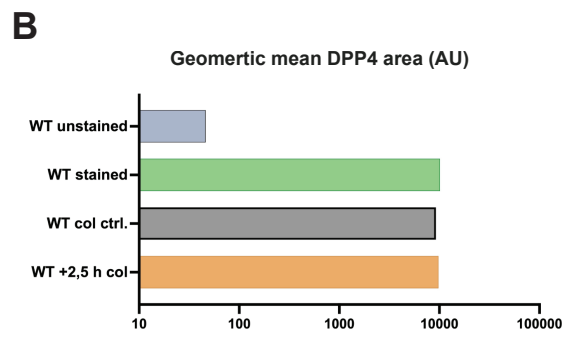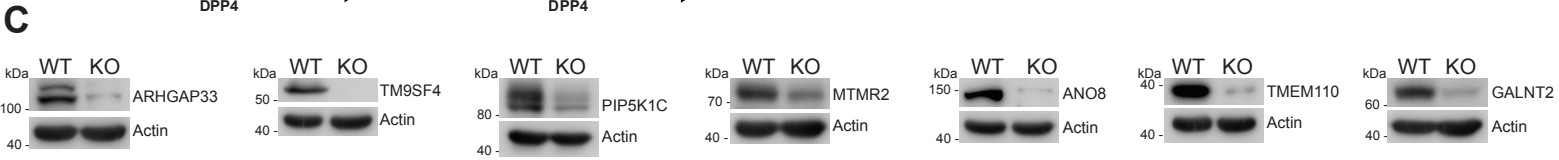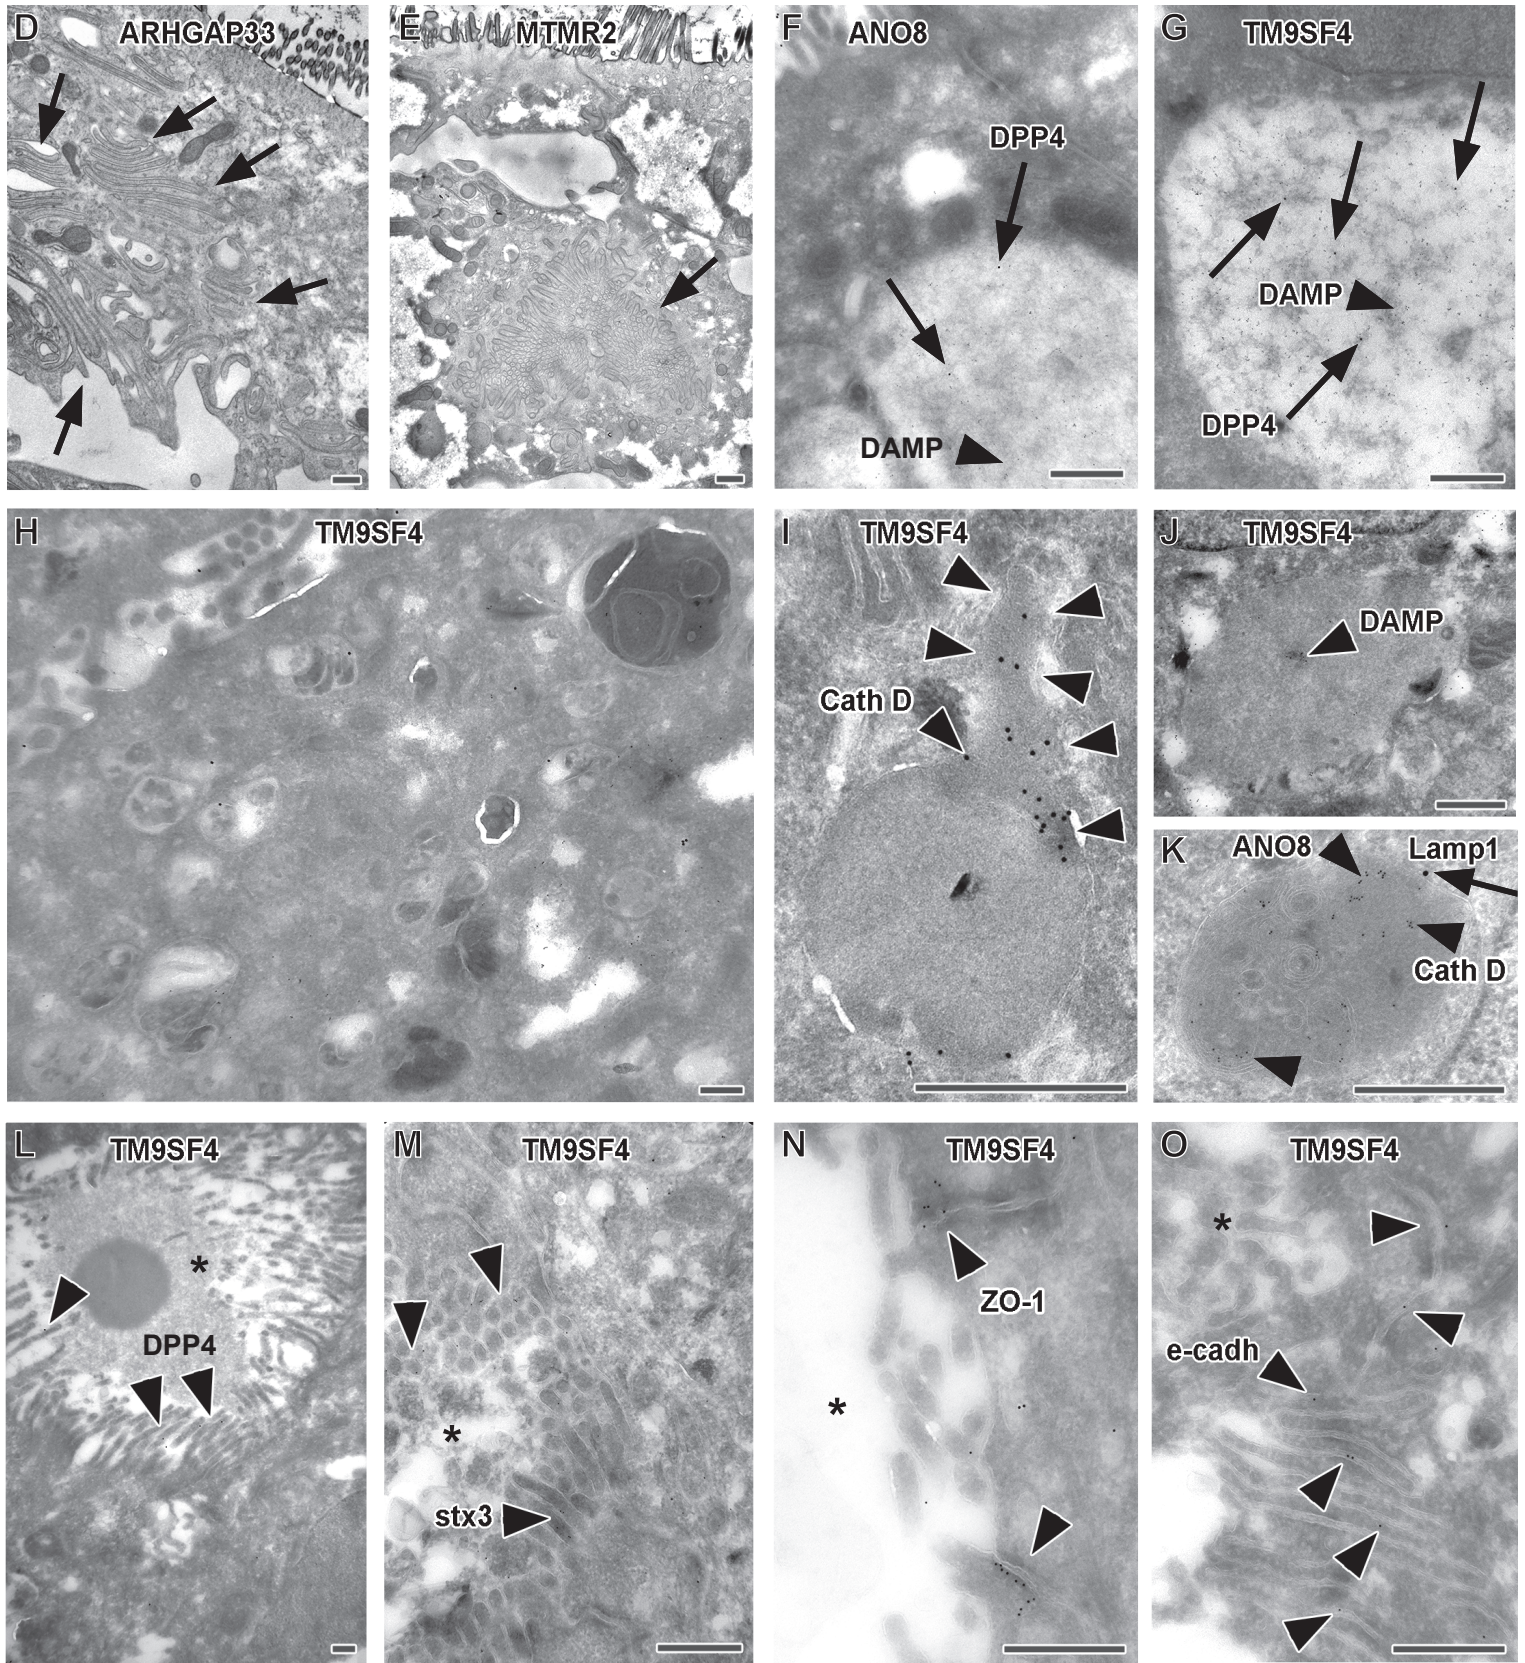

Supplement: supp [file elife-80135-supp-v1.zip]
